# Supplementary material for: Reducing and meta-analysing estimates from distributed lag non-linear models
Source: BMC Med Res Methodol. 2013 Jan 9;13:1. doi: 10.1186/1471-2288-13-1 (PMC3599933; doi:10.1186/1471-2288-13-1)
Supplement: Additional file 2 — Data. This csv file includes the time series data for the 10 regions of England and Wales during the period 1993–2006, used in the example. [file 1471-2288-13-1-S2.csv]

	date	year	month	day	time	yday	dow	region	regnames	tmean	tmin	tmax	dewp	rh	death
1	1993-01-01	1993	1	1	1	1	Fri	1	N-East	2.60374736785889	-0.388518214225769	5.64015102386475	0.891811668872833	84.8620223999023	125
2	1993-01-02	1993	1	2	2	2	Sat	1	N-East	0.119176626205444	-2.39403653144836	2.68488526344299	0.46724659204483	88.9935531616211	96
3	1993-01-03	1993	1	3	3	3	Sun	1	N-East	-2.91299796104431	-5.70385599136353	-0.0630022808909416	-4.83275365829468	90.901123046875	92
4	1993-01-04	1993	1	4	4	4	Mon	1	N-East	1.640505194664	-3.85672664642334	7.22418785095215	1.06724655628204	86.2743072509766	80
5	1993-01-05	1993	1	5	5	5	Tue	1	N-East	4.30699586868286	-0.132330626249313	8.78360462188721	2.86724662780762	66.7146301269531	103
6	1993-01-06	1993	1	6	6	6	Wed	1	N-East	4.46766471862793	2.88887572288513	6.04328632354736	0.712282538414001	72.0913009643555	119
7	1993-01-07	1993	1	7	7	7	Thu	1	N-East	5.26765966415405	1.79884052276611	8.75096797943115	2.01228260993958	71.9497375488281	97
8	1993-01-08	1993	1	8	8	8	Fri	1	N-East	5.72722053527832	2.59795689582825	8.86796569824219	-1.65086984634399	61.0199584960938	113
9	1993-01-09	1993	1	9	9	9	Sat	1	N-East	6.56201028823853	2.92950010299683	10.2122383117676	3.07952904701233	67.7204666137695	87
10	1993-01-10	1993	1	10	10	10	Sun	1	N-East	7.18454694747925	3.38013792037964	11.0088481903076	2.7573184967041	72.4012298583984	116
11	1993-01-11	1993	1	11	11	11	Mon	1	N-East	2.07651472091675	-0.146024152636528	4.3333535194397	0.648515522480011	84.8694915771484	104
12	1993-01-12	1993	1	12	12	12	Tue	1	N-East	2.31619572639465	-0.534685492515564	5.20450496673584	-2.75322437286377	65.4584426879883	111
13	1993-01-13	1993	1	13	13	13	Wed	1	N-East	3.84925532341003	1.58020639419556	6.13367700576782	3.18771767616272	85.4889450073242	97
14	1993-01-14	1993	1	14	14	14	Thu	1	N-East	5.38920021057129	1.58878433704376	9.2144136428833	-1.88771748542786	61.5193481445312	98
15	1993-01-15	1993	1	15	15	15	Fri	1	N-East	7.60972356796265	2.84051203727722	12.3976392745972	4.95905828475952	73.5812606811523	112
16	1993-01-16	1993	1	16	16	16	Sat	1	N-East	8.74074649810791	4.47762107849121	13.0122213363647	7.94268178939819	76.7491226196289	104
17	1993-01-17	1993	1	17	17	17	Sun	1	N-East	8.74953842163086	4.83310079574585	12.6739854812622	-2.62221097946167	50.2994918823242	88
18	1993-01-18	1993	1	18	18	18	Mon	1	N-East	4.76631498336792	2.70949506759644	6.82189559936523	0.0877174735069275	71.9310150146484	96
19	1993-01-19	1993	1	19	19	19	Tue	1	N-East	6.24920034408569	2.70338463783264	9.79855632781982	0.567246615886688	74.7403259277344	98
20	1993-01-20	1993	1	20	20	20	Wed	1	N-East	8.24264621734619	4.60275650024414	11.8881235122681	3.02047109603882	63.3275299072266	80
21	1993-01-21	1993	1	21	21	21	Thu	1	N-East	8.84769248962402	5.54446649551392	12.1532602310181	4.60818862915039	74.1514892578125	101
22	1993-01-22	1993	1	22	22	22	Fri	1	N-East	6.29185485839844	3.77167558670044	8.81044960021973	0.964892148971558	70.9718475341797	71
23	1993-01-23	1993	1	23	23	23	Sat	1	N-East	6.73798799514771	2.24246549606323	11.2418689727783	0.436847597360611	79.7620315551758	103
24	1993-01-24	1993	1	24	24	24	Sun	1	N-East	4.96865701675415	1.00450575351715	8.93671131134033	-0.232753410935402	61.3648910522461	117
25	1993-01-25	1993	1	25	25	25	Mon	1	N-East	1.53085076808929	-0.704972386360168	3.76833987236023	-8.11054229736328	51.5783004760742	102
26	1993-01-26	1993	1	26	26	26	Tue	1	N-East	3.39214110374451	0.340235650539398	6.4494800567627	2.27952933311462	80.3303985595703	98
27	1993-01-27	1993	1	27	27	27	Wed	1	N-East	3.49427700042725	0.383697181940079	6.60895156860352	1.636847615242	88.4333648681641	87
28	1993-01-28	1993	1	28	28	28	Thu	1	N-East	5.30775928497314	2.19889402389526	8.42032718658447	5.88945770263672	93.6455383300781	100
29	1993-01-29	1993	1	29	29	29	Fri	1	N-East	4.88189315795898	3.55499625205994	6.20225954055786	3.88362336158752	88.1573181152344	79
30	1993-01-30	1993	1	30	30	30	Sat	1	N-East	5.58070421218872	3.53594422340393	7.62120485305786	3.03275370597839	80.7169952392578	116
31	1993-01-31	1993	1	31	31	31	Sun	1	N-East	4.87793827056885	1.77593564987183	7.98608446121216	-0.612282514572144	67.4859771728516	70
32	1993-02-01	1993	2	1	32	32	Mon	1	N-East	0.904855132102966	-2.49428963661194	4.31618404388428	1.00818836688995	91.7198638916016	83
33	1993-02-02	1993	2	2	33	33	Tue	1	N-East	5.75205039978027	1.11333429813385	10.4087400436401	3.31637644767761	76.6111602783203	91
34	1993-02-03	1993	2	3	34	34	Wed	1	N-East	7.79339027404785	5.52678394317627	10.0527791976929	3.86960101127625	67.7363357543945	74
35	1993-02-04	1993	2	4	35	35	Thu	1	N-East	8.28367233276367	6.59659051895142	9.96081733703613	4.23684740066528	71.5930404663086	95
36	1993-02-05	1993	2	5	36	36	Fri	1	N-East	7.61454486846924	5.16813468933105	10.0540943145752	3.54912996292114	71.7152481079102	83
37	1993-02-06	1993	2	6	37	37	Sat	1	N-East	10.0127992630005	7.10043144226074	12.9222078323364	7.93684768676758	84.8847427368164	107
38	1993-02-07	1993	2	7	38	38	Sun	1	N-East	11.6206512451172	8.571702003479	14.6650438308716	8.90409374237061	84.2911987304688	80
39	1993-02-08	1993	2	8	39	39	Mon	1	N-East	7.96398639678955	6.54122161865234	9.38127613067627	7.66315269470215	95.1900634765625	68
40	1993-02-09	1993	2	9	40	40	Tue	1	N-East	6.70763635635376	5.42965793609619	7.97568893432617	6.01637697219849	91.6152572631836	80
41	1993-02-10	1993	2	10	41	41	Wed	1	N-East	4.19343519210815	3.32956886291504	5.04893112182617	2.7573184967041	89.5333709716797	75
42	1993-02-11	1993	2	11	42	42	Thu	1	N-East	4.20439529418945	3.14810538291931	5.25327634811401	1.82047080993652	80.0497512817383	73
43	1993-02-12	1993	2	12	43	43	Fri	1	N-East	3.17235207557678	0.75342983007431	5.59594869613647	1.01228249073029	80.6497497558594	97
44	1993-02-13	1993	2	13	44	44	Sat	1	N-East	2.5885055065155	-0.873997211456299	6.05450439453125	1.54094183444977	88.2029724121094	87
45	1993-02-14	1993	2	14	45	45	Sun	1	N-East	3.98116493225098	0.714292228221893	7.25417137145996	1.91637670993805	85.8251800537109	72
46	1993-02-15	1993	2	15	46	46	Mon	1	N-East	4.86148881912231	1.587357878685	8.13892078399658	-0.5119349360466	62.0238494873047	85
47	1993-02-16	1993	2	16	47	47	Tue	1	N-East	7.93717241287231	4.76080513000488	11.1206693649292	6.31228303909302	81.5280380249023	100
48	1993-02-17	1993	2	17	48	48	Wed	1	N-East	10.0299196243286	6.99408769607544	13.0635080337524	6.10000038146973	77.0736923217773	86
49	1993-02-18	1993	2	18	49	49	Thu	1	N-East	6.45586061477661	4.10200548171997	8.80344200134277	3.17134070396423	72.318115234375	92
50	1993-02-19	1993	2	19	50	50	Fri	1	N-East	6.32866907119751	3.56131839752197	9.09286022186279	-2.63449335098267	50.9070625305176	70
51	1993-02-20	1993	2	20	51	51	Sat	1	N-East	5.35037565231323	1.92268145084381	8.78391933441162	2.28362345695496	71.5519943237305	75
52	1993-02-21	1993	2	21	52	52	Sun	1	N-East	3.68055629730225	1.56004917621613	5.79859066009521	-7.2426815032959	45.5006141662598	71
53	1993-02-22	1993	2	22	53	53	Mon	1	N-East	2.84592509269714	-0.409414738416672	6.10782527923584	-0.442681550979614	72.1579284667969	83
54	1993-02-23	1993	2	23	54	54	Tue	1	N-East	3.53539538383484	-0.0151489060372114	7.09438896179199	2.03275346755981	80.1859741210938	95
55	1993-02-24	1993	2	24	55	55	Wed	1	N-East	5.73317623138428	4.03971433639526	7.4237003326416	2.55322432518005	74.9777908325195	102
56	1993-02-25	1993	2	25	56	56	Thu	1	N-East	5.85086870193481	4.22771501541138	7.46700716018677	1.72865927219391	69.9006118774414	79
57	1993-02-26	1993	2	26	57	57	Fri	1	N-East	3.57019925117493	0.963098466396332	6.17861366271973	-1.6672465801239	68.4555816650391	95
58	1993-02-27	1993	2	27	58	58	Sat	1	N-East	-0.310434967279434	-3.41423749923706	2.80137944221497	-3.32047080993652	82.9783020019531	87
59	1993-02-28	1993	2	28	59	59	Sun	1	N-East	0.22596962749958	-2.40917062759399	2.86577224731445	0.497030973434448	93.2582321166992	104
60	1993-03-01	1993	3	1	60	60	Mon	1	N-East	1.60716104507446	-0.31953763961792	3.53596687316895	-2.77778935432434	67.0291748046875	83
61	1993-03-02	1993	3	2	61	61	Tue	1	N-East	2.2806191444397	0.96001398563385	3.601069688797	-1.38362324237823	70.7736892700195	80
62	1993-03-03	1993	3	3	62	62	Wed	1	N-East	2.4791362285614	1.60766172409058	3.34594202041626	-0.0918116495013237	83.3000030517578	88
63	1993-03-04	1993	3	4	63	63	Thu	1	N-East	3.61844205856323	0.789086222648621	6.45399618148804	-3.38362336158752	61.9391975402832	92
64	1993-03-05	1993	3	5	64	64	Fri	1	N-East	7.17264032363892	2.12974262237549	12.2281169891357	4.88771772384644	70.9280395507812	102
65	1993-03-06	1993	3	6	65	65	Sat	1	N-East	7.7475962638855	3.07036709785461	12.4347162246704	3.85086989402771	76.0064544677734	101
66	1993-03-07	1993	3	7	66	66	Sun	1	N-East	4.9582896232605	1.11994397640228	8.7999792098999	2.38362336158752	76.8713455200195	101
67	1993-03-08	1993	3	8	67	67	Mon	1	N-East	5.08622980117798	3.18237471580505	6.9868597984314	2.05322432518005	76.0947799682617	109
68	1993-03-09	1993	3	9	68	68	Tue	1	N-East	3.28062510490417	-0.170325458049774	6.73576259613037	0.553224265575409	74.6094131469727	105
69	1993-03-10	1993	3	10	69	69	Wed	1	N-East	1.90838587284088	-1.49869418144226	5.32071495056152	0.595905840396881	81.3993759155273	101
70	1993-03-11	1993	3	11	70	70	Thu	1	N-East	5.16147375106812	2.52885341644287	7.79402542114258	4	87.1555786132812	96
71	1993-03-12	1993	3	12	71	71	Fri	1	N-East	7.93544578552246	3.33747148513794	12.5390129089355	4.03275346755981	66.3919143676758	101
72	1993-03-13	1993	3	13	72	72	Sat	1	N-East	11.8692455291748	7.23499822616577	16.5084590911865	7.3344931602478	73.2368469238281	98
73	1993-03-14	1993	3	14	73	73	Sun	1	N-East	8.82531929016113	4.34134960174561	13.320990562439	4.41228294372559	67.925178527832	102
74	1993-03-15	1993	3	15	74	74	Mon	1	N-East	11.1731252670288	7.35251140594482	14.9929151535034	6.33684778213501	66.1275405883789	109
75	1993-03-16	1993	3	16	75	75	Tue	1	N-East	8.77905559539795	5.47310352325439	12.0839443206787	2.72456526756287	69.8988723754883	82
76	1993-03-17	1993	3	17	76	76	Wed	1	N-East	11.6671504974365	7.87001466751099	15.4652128219604	8.09181213378906	71.8146286010742	92
77	1993-03-18	1993	3	18	77	77	Thu	1	N-East	8.09456920623779	6.01025152206421	10.1732883453369	0.960798025131226	65.2671432495117	92
78	1993-03-19	1993	3	19	78	78	Fri	1	N-East	7.10038328170776	3.81619930267334	10.3868246078491	0.636847615242004	60.8310127258301	103
79	1993-03-20	1993	3	20	79	79	Sat	1	N-East	7.93556690216064	6.08477926254272	9.78022384643555	1.2286593914032	60.7743072509766	74
80	1993-03-21	1993	3	21	80	80	Sun	1	N-East	9.13689708709717	6.30767822265625	11.9633588790894	2.71811652183533	60.7315254211426	95
81	1993-03-22	1993	3	22	81	81	Mon	1	N-East	6.06719350814819	1.99073195457458	10.1468811035156	0.508188366889954	62.1637649536133	86
82	1993-03-23	1993	3	23	82	82	Tue	1	N-East	4.53531885147095	1.6366525888443	7.43542718887329	-1.94503593444824	61.4110527038574	99
83	1993-03-24	1993	3	24	83	83	Wed	1	N-East	6.17215061187744	1.56413578987122	10.788969039917	4.89938497543335	83.3238372802734	95
84	1993-03-25	1993	3	25	84	84	Thu	1	N-East	4.20531606674194	0.116170465946198	8.30623435974121	-4.25905847549438	50.1269149780273	86
85	1993-03-26	1993	3	26	85	85	Fri	1	N-East	2.9960560798645	-3.54965114593506	9.56360149383545	-2.23858737945557	57.470832824707	88
86	1993-03-27	1993	3	27	86	86	Sat	1	N-East	3.64690208435059	-1.97300946712494	9.28366184234619	-1.50173985958099	61.1322402954102	90
87	1993-03-28	1993	3	28	87	87	Sun	1	N-East	4.96877145767212	2.47462701797485	7.46320009231567	-0.559058248996735	65.7088012695312	101
88	1993-03-29	1993	3	29	88	88	Mon	1	N-East	6.12343072891235	2.20365929603577	10.0456295013428	-1.23449325561523	55.7240562438965	92
89	1993-03-30	1993	3	30	89	89	Tue	1	N-East	9.41234683990479	5.9765305519104	12.8523015975952	2.82865929603577	58.6234397888184	84
90	1993-03-31	1993	3	31	90	90	Wed	1	N-East	6.35328006744385	1.71568739414215	10.9998817443848	1.96550691127777	65.1953964233398	97
91	1993-04-01	1993	4	1	91	91	Thu	1	N-East	6.65193033218384	2.6582396030426	10.6535501480103	1.36141264438629	60.7193489074707	91
92	1993-04-02	1993	4	2	92	92	Fri	1	N-East	6.95547962188721	2.76151561737061	11.1567497253418	2.05731844902039	65.4766616821289	97
93	1993-04-03	1993	4	3	93	93	Sat	1	N-East	5.43793201446533	0.372922956943512	10.5155181884766	3.24094176292419	72.5462646484375	92
94	1993-04-04	1993	4	4	94	94	Sun	1	N-East	7.12574577331543	2.85686492919922	11.3980340957642	-0.648515522480011	57.9474906921387	91
95	1993-04-05	1993	4	5	95	95	Mon	1	N-East	7.01444149017334	2.68939304351807	11.3523931503296	3.32047080993652	71.484245300293	113
96	1993-04-06	1993	4	6	96	96	Tue	1	N-East	8.784255027771	5.68933010101318	11.8790349960327	4.32047128677368	69.7012329101562	87
97	1993-04-07	1993	4	7	97	97	Wed	1	N-East	7.26660394668579	4.83740425109863	9.69229698181152	3.76960110664368	73.6936492919922	79
98	1993-04-08	1993	4	8	98	98	Thu	1	N-East	5.75065040588379	3.73337054252625	7.76181030273438	4.20409440994263	83.6883316040039	86
99	1993-04-09	1993	4	9	99	99	Fri	1	N-East	6.31069040298462	5.00959300994873	7.60145998001099	5.29181241989136	94	78
100	1993-04-10	1993	4	10	100	100	Sat	1	N-East	9.53497505187988	5.11769962310791	13.9540939331055	2.90235447883606	57.2796287536621	84
101	1993-04-11	1993	4	11	101	101	Sun	1	N-East	5.12479496002197	2.45840740203857	7.79504823684692	3.5286591053009	87.1146392822266	87
102	1993-04-12	1993	4	12	102	102	Mon	1	N-East	5.4225959777832	3.95211410522461	6.88657188415527	5.67952871322632	97.4526062011719	75
103	1993-04-13	1993	4	13	103	103	Tue	1	N-East	5.67328405380249	4.33266067504883	7.00633907318115	2.08771729469299	75.9877166748047	103
104	1993-04-14	1993	4	14	104	104	Wed	1	N-East	6.40508365631104	3.12675857543945	9.65863704681396	-0.663152396678925	57.876049041748	85
105	1993-04-15	1993	4	15	105	105	Thu	1	N-East	7.11339282989502	-0.477807551622391	14.7172222137451	1.88188350200653	57.47021484375	104
106	1993-04-16	1993	4	16	106	106	Fri	1	N-East	9.67850208282471	7.82840156555176	11.5396270751953	5.14912986755371	68.7070617675781	95
107	1993-04-17	1993	4	17	107	107	Sat	1	N-East	9.10285949707031	6.60112524032593	11.6128845214844	1.80818831920624	58.3140258789062	76
108	1993-04-18	1993	4	18	108	108	Sun	1	N-East	6.72454500198364	5.23374128341675	8.22920799255371	4.86315250396729	96.3912048339844	81
109	1993-04-19	1993	4	19	109	109	Mon	1	N-East	8.51218223571777	4.6469407081604	12.4085073471069	6.97134113311768	86.0667343139648	82
110	1993-04-20	1993	4	20	110	110	Tue	1	N-East	11.0732507705688	7.97905397415161	14.1519622802734	7.01228284835815	70.2906875610352	111
111	1993-04-21	1993	4	21	111	111	Wed	1	N-East	10.8045892715454	7.7708888053894	13.81676197052	3.39416599273682	56.2380790710449	80
112	1993-04-22	1993	4	22	112	112	Thu	1	N-East	9.94466400146484	7.1418981552124	12.76673412323	5.76550674438477	68.0216979980469	75
113	1993-04-23	1993	4	23	113	113	Fri	1	N-East	12.5709047317505	9.13999366760254	15.9965028762817	6.91637706756592	65.833984375	82
114	1993-04-24	1993	4	24	114	114	Sat	1	N-East	9.8686408996582	6.07220649719238	13.6741170883179	6.43684768676758	71.3895645141602	98
115	1993-04-25	1993	4	25	115	115	Sun	1	N-East	7.00536870956421	5.50764989852905	8.50185298919678	6.81637668609619	92.9310150146484	80
116	1993-04-26	1993	4	26	116	116	Mon	1	N-East	7.32388019561768	6.17903089523315	8.44417762756348	6.40818881988525	94.2473831176758	87
117	1993-04-27	1993	4	27	117	117	Tue	1	N-East	7.54004287719727	5.85463953018188	9.23568439483643	6.68771696090698	92.2286529541016	82
118	1993-04-28	1993	4	28	118	118	Wed	1	N-East	7.96595907211304	5.47633838653564	10.4779052734375	4.26141262054443	76.8152542114258	67
119	1993-04-29	1993	4	29	119	119	Thu	1	N-East	9.27196311950684	4.12917804718018	14.4296112060547	3.88597774505615	61.9656105041504	96
120	1993-04-30	1993	4	30	120	120	Fri	1	N-East	11.4403619766235	5.24053430557251	17.6548500061035	7.60818862915039	80.2994918823242	77
121	1993-05-01	1993	5	1	121	121	Sat	1	N-East	11.5156412124634	7.30108642578125	15.7265348434448	6.00235414505005	65.4591674804688	97
122	1993-05-02	1993	5	2	122	122	Sun	1	N-East	8.03604888916016	5.57254362106323	10.5111465454102	2.03684759140015	67.9392013549805	78
123	1993-05-03	1993	5	3	123	123	Mon	1	N-East	7.51331281661987	2.09698891639709	12.9044485092163	-0.35086989402771	51.3053283691406	88
124	1993-05-04	1993	5	4	124	124	Tue	1	N-East	8.81195735931396	2.85465168952942	14.7737474441528	-0.228044599294662	44.473804473877	84
125	1993-05-05	1993	5	5	125	125	Wed	1	N-East	9.60708808898926	6.56869792938232	12.6099271774292	7.54094171524048	83.2988739013672	80
126	1993-05-06	1993	5	6	126	126	Thu	1	N-East	9.57030868530273	6.74363851547241	12.3788156509399	6.42865943908691	79.9766616821289	76
127	1993-05-07	1993	5	7	127	127	Fri	1	N-East	7.80181503295898	2.11025404930115	13.553879737854	4.37369537353516	62.2386894226074	92
128	1993-05-08	1993	5	8	128	128	Sat	1	N-East	8.02689552307129	5.17571067810059	10.9201946258545	5.27778959274292	76.0205764770508	83
129	1993-05-09	1993	5	9	129	129	Sun	1	N-East	9.10876083374023	6.47246170043945	11.753698348999	5.52865934371948	75.3497467041016	87
130	1993-05-10	1993	5	10	130	130	Mon	1	N-East	10.0712184906006	8.0300760269165	12.1165351867676	7.8040943145752	85.704704284668	66
131	1993-05-11	1993	5	11	131	131	Tue	1	N-East	11.178035736084	7.70744848251343	14.6719303131104	7.80000066757202	77.4292678833008	79
132	1993-05-12	1993	5	12	132	132	Wed	1	N-East	7.57715940475464	6.49839687347412	8.68565940856934	5.42047071456909	87.0982666015625	78
133	1993-05-13	1993	5	13	133	133	Thu	1	N-East	6.12192440032959	4.87149333953857	7.38900566101074	3.54094171524048	81.5006103515625	79
134	1993-05-14	1993	5	14	134	134	Fri	1	N-East	6.15416717529297	4.22371387481689	8.07360076904297	5.25496435165405	96.1649017333984	79
135	1993-05-15	1993	5	15	135	135	Sat	1	N-East	5.98447847366333	1.71380114555359	10.2751913070679	0.990071892738342	59.2936553955078	74
136	1993-05-16	1993	5	16	136	136	Sun	1	N-East	8.4237813949585	3.11948728561401	13.7769660949707	5.80000019073486	75.8350982666016	78
137	1993-05-17	1993	5	17	137	137	Mon	1	N-East	14.3192090988159	9.38765716552734	19.2505226135254	10.8426809310913	70.0024566650391	91
138	1993-05-18	1993	5	18	138	138	Tue	1	N-East	12.4655904769897	8.57510280609131	16.3648014068604	1.17195546627045	42.7311210632324	85
139	1993-05-19	1993	5	19	139	139	Wed	1	N-East	11.325270652771	7.41462182998657	15.2473659515381	6.9573187828064	75.6731796264648	82
140	1993-05-20	1993	5	20	140	140	Thu	1	N-East	9.06895732879639	4.63596200942993	13.486686706543	5.52456521987915	74.7251815795898	72
141	1993-05-21	1993	5	21	141	141	Fri	1	N-East	10.6210489273071	7.28465700149536	13.97252368927	9.37543392181396	88.5111541748047	85
142	1993-05-22	1993	5	22	142	142	Sat	1	N-East	11.9702291488647	5.4216570854187	18.4945526123047	7.8040943145752	62.2240562438965	76
143	1993-05-23	1993	5	23	143	143	Sun	1	N-East	13.6881694793701	8.93784618377686	18.4496459960938	7.50235414505005	57.3252830505371	79
144	1993-05-24	1993	5	24	144	144	Mon	1	N-East	10.8663005828857	6.51064968109131	15.2155447006226	8.11637687683105	74.7451477050781	96
145	1993-05-25	1993	5	25	145	145	Tue	1	N-East	10.3531265258789	8.07639598846436	12.6232652664185	6.14913034439087	80.6579360961914	99
146	1993-05-26	1993	5	26	146	146	Wed	1	N-East	8.08360195159912	7.01384878158569	9.15005493164062	3.24913024902344	70.8292770385742	86
147	1993-05-27	1993	5	27	147	147	Thu	1	N-East	8.26033401489258	7.25870132446289	9.23468589782715	4.71637678146362	77.2672424316406	88
148	1993-05-28	1993	5	28	148	148	Fri	1	N-East	9.88260459899902	6.03176546096802	13.7450685501099	4.92630481719971	71.2321395874023	79
149	1993-05-29	1993	5	29	149	149	Sat	1	N-East	13.7267589569092	8.79976654052734	18.6587200164795	8.39416599273682	60.6082916259766	91
150	1993-05-30	1993	5	30	150	150	Sun	1	N-East	13.7149114608765	10.2617597579956	17.1660289764404	10.1327533721924	67.3539428710938	94
151	1993-05-31	1993	5	31	151	151	Mon	1	N-East	12.7849884033203	10.81396484375	14.748236656189	8.8409423828125	75.2526092529297	90
152	1993-06-01	1993	6	1	152	152	Tue	1	N-East	11.8506460189819	8.68154907226562	15.0493507385254	9.86724662780762	83.4058380126953	87
153	1993-06-02	1993	6	2	153	153	Wed	1	N-East	12.4663381576538	10.0542030334473	14.8957386016846	10.2713413238525	92.0169906616211	81
154	1993-06-03	1993	6	3	154	154	Thu	1	N-East	11.1438188552856	8.39014053344727	13.9153680801392	8.59590625762939	84.6777877807617	77
155	1993-06-04	1993	6	4	155	155	Fri	1	N-East	14.2794466018677	9.26777839660645	19.3288040161133	11.1590585708618	70.5018463134766	79
156	1993-06-05	1993	6	5	156	156	Sat	1	N-East	15.0566139221191	9.41965675354004	20.7063369750977	5.94503593444824	50.5953941345215	63
157	1993-06-06	1993	6	6	157	157	Sun	1	N-East	14.4481859207153	7.66986322402954	21.2087593078613	10.8344917297363	65.4713439941406	70
158	1993-06-07	1993	6	7	158	158	Mon	1	N-East	15.8499374389648	11.0091228485107	20.7286052703857	10.0959062576294	60.2795295715332	64
159	1993-06-08	1993	6	8	159	159	Tue	1	N-East	15.5648012161255	9.15675830841064	21.9949054718018	10.624566078186	61.8755378723145	84
160	1993-06-09	1993	6	9	160	160	Wed	1	N-East	17.8144397735596	12.3846826553345	23.211971282959	12.5040941238403	60.9194526672363	60
161	1993-06-10	1993	6	10	161	161	Thu	1	N-East	13.6657886505127	11.6520957946777	15.6784887313843	12.0795297622681	90.2719497680664	89
162	1993-06-11	1993	6	11	162	162	Fri	1	N-East	13.1733522415161	12.0462436676025	14.3075790405273	12.5713415145874	93.1707229614258	91
163	1993-06-12	1993	6	12	163	163	Sat	1	N-East	11.7409133911133	10.5653734207153	12.8877792358398	10.2713413238525	95.4508666992188	77
164	1993-06-13	1993	6	13	164	164	Sun	1	N-East	10.1676645278931	7.47706508636475	12.8616390228271	3.07369542121887	61.4029693603516	75
165	1993-06-14	1993	6	14	165	165	Mon	1	N-East	10.0573225021362	7.59251260757446	12.5385789871216	5.42047071456909	75.9426727294922	71
166	1993-06-15	1993	6	15	166	166	Tue	1	N-East	10.3444261550903	4.11677312850952	16.589693069458	7.2573184967041	60.3766593933105	72
167	1993-06-16	1993	6	16	167	167	Wed	1	N-East	13.8448028564453	10.7579307556152	16.9463005065918	7.42456483840942	61.1877212524414	78
168	1993-06-17	1993	6	17	168	168	Thu	1	N-East	14.671178817749	11.2921733856201	18.047779083252	8.25322437286377	57.8398170471191	63
169	1993-06-18	1993	6	18	169	169	Fri	1	N-East	14.3969535827637	10.5857410430908	18.1793403625488	10.9245643615723	69.9281463623047	63
170	1993-06-19	1993	6	19	170	170	Sat	1	N-East	13.5466871261597	10.5599002838135	16.5168991088867	7.19416570663452	59.5018463134766	87
171	1993-06-20	1993	6	20	171	171	Sun	1	N-East	13.2453346252441	9.01759338378906	17.5031929016113	7.93684768676758	63.9883308410645	71
172	1993-06-21	1993	6	21	172	172	Mon	1	N-East	12.3845615386963	8.77162742614746	15.976993560791	6.22865915298462	59.7947807312012	79
173	1993-06-22	1993	6	22	173	173	Tue	1	N-East	12.9989252090454	10.3249406814575	15.6879320144653	7.71637678146362	68.7275390625	70
174	1993-06-23	1993	6	23	174	174	Wed	1	N-East	11.044807434082	7.61699199676514	14.4911756515503	5.30818891525269	66.1941680908203	76
175	1993-06-24	1993	6	24	175	175	Thu	1	N-East	9.82557106018066	5.77132415771484	13.9077014923096	4.26550674438477	57.3649978637695	78
176	1993-06-25	1993	6	25	176	176	Fri	1	N-East	12.7047386169434	8.5358772277832	16.8498973846436	8.81228256225586	77.0743179321289	71
177	1993-06-26	1993	6	26	177	177	Sat	1	N-East	15.2359886169434	10.2224836349487	20.2693958282471	11.1754350662231	65.4286575317383	83
178	1993-06-27	1993	6	27	178	178	Sun	1	N-East	14.3332986831665	9.30538463592529	19.3406982421875	7.56315231323242	57.7409439086914	72
179	1993-06-28	1993	6	28	179	179	Mon	1	N-East	13.5937061309814	8.25083541870117	18.9498920440674	11.1467752456665	71.7169952392578	70
180	1993-06-29	1993	6	29	180	180	Tue	1	N-East	16.3799800872803	10.6810026168823	22.0972137451172	13.0344934463501	69.3018417358398	79
181	1993-06-30	1993	6	30	181	181	Wed	1	N-East	15.8780765533447	11.114595413208	20.6533966064453	14.5058336257935	80.7374649047852	69
182	1993-07-01	1993	7	1	182	182	Thu	1	N-East	15.8275527954102	11.4897556304932	20.1866512298584	14.8730802536011	90.1403274536133	71
183	1993-07-02	1993	7	2	183	183	Fri	1	N-East	15.7841682434082	11.2646408081055	20.3131446838379	11.6672468185425	65.4637680053711	73
184	1993-07-03	1993	7	3	184	184	Sat	1	N-East	18.3544540405273	15.1418027877808	21.5569763183594	14.0467758178711	77.3268203735352	75
185	1993-07-04	1993	7	4	185	185	Sun	1	N-East	17.0163097381592	14.0402841567993	19.9935836791992	13.3607978820801	77.089958190918	74
186	1993-07-05	1993	7	5	186	186	Mon	1	N-East	12.1363716125488	8.03955554962158	16.2027034759521	5.25322437286377	56.6415557861328	71
187	1993-07-06	1993	7	6	187	187	Tue	1	N-East	13.6293935775757	8.76304531097412	18.4901485443115	6.42047071456909	54.6567001342773	60
188	1993-07-07	1993	7	7	188	188	Wed	1	N-East	14.6635389328003	9.820068359375	19.5328903198242	9.5	61.3812675476074	85
189	1993-07-08	1993	7	8	189	189	Thu	1	N-East	15.1234035491943	11.8121557235718	18.4410915374756	11.4204702377319	70.4883422851562	80
190	1993-07-09	1993	7	9	190	190	Fri	1	N-East	10.7706508636475	7.26489734649658	14.2850961685181	4.74094152450562	62.7081909179688	93
191	1993-07-10	1993	7	10	191	191	Sat	1	N-East	10.9791698455811	7.12542724609375	14.8259248733521	3.76960110664368	54.9251823425293	71
192	1993-07-11	1993	7	11	192	192	Sun	1	N-East	12.4245004653931	8.93221282958984	15.9269647598267	4.5392017364502	57.0334701538086	79
193	1993-07-12	1993	7	12	193	193	Mon	1	N-East	11.4842977523804	6.29221200942993	16.6485862731934	4.71873092651367	56.171443939209	77
194	1993-07-13	1993	7	13	194	194	Tue	1	N-East	13.311056137085	7.56666469573975	19.0382518768311	6.735107421875	52.941047668457	74
195	1993-07-14	1993	7	14	195	195	Wed	1	N-East	13.022801399231	11.5463409423828	14.4739265441895	11.4204702377319	92.2614059448242	76
196	1993-07-15	1993	7	15	196	196	Thu	1	N-East	13.8233423233032	12.1613388061523	15.4748878479004	13.0836248397827	93.6351089477539	82
197	1993-07-16	1993	7	16	197	197	Fri	1	N-East	17.5379219055176	13.4238500595093	21.6644096374512	13.4163751602173	72.4158630371094	61
198	1993-07-17	1993	7	17	198	198	Sat	1	N-East	16.7983722686768	13.9354829788208	19.6891670227051	9.95322418212891	61.9023513793945	60
199	1993-07-18	1993	7	18	199	199	Sun	1	N-East	14.3810567855835	8.85956287384033	19.9050235748291	9.7426815032959	67.4976425170898	68
200	1993-07-19	1993	7	19	200	200	Mon	1	N-East	13.6554393768311	11.8176984786987	15.4931221008301	11.5040950775146	86.3129043579102	81
201	1993-07-20	1993	7	20	201	201	Tue	1	N-East	14.1849899291992	10.7844762802124	17.5974559783936	10.0754356384277	76.8637619018555	80
202	1993-07-21	1993	7	21	202	202	Wed	1	N-East	13.7179660797119	10.2545614242554	17.1928825378418	8.05731868743896	62.1480026245117	76
203	1993-07-22	1993	7	22	203	203	Thu	1	N-East	14.0034971237183	8.66585445404053	19.3534679412842	8.44094181060791	58.6708297729492	76
204	1993-07-23	1993	7	23	204	204	Fri	1	N-East	17.2636947631836	14.1714601516724	20.3439826965332	14.9204702377319	77.151481628418	80
205	1993-07-24	1993	7	24	205	205	Sat	1	N-East	15.3511667251587	12.1590089797974	18.5368518829346	7.14094209671021	57.3450355529785	60
206	1993-07-25	1993	7	25	206	206	Sun	1	N-East	13.4688091278076	10.2335176467896	16.6983242034912	7.60000038146973	65.0952911376953	78
207	1993-07-26	1993	7	26	207	207	Mon	1	N-East	13.8207159042358	10.9204988479614	16.7133827209473	6.20409440994263	56.8163757324219	81
208	1993-07-27	1993	7	27	208	208	Tue	1	N-East	14.3387765884399	10.2124662399292	18.4633045196533	12.5713415145874	84.5176086425781	84
209	1993-07-28	1993	7	28	209	209	Wed	1	N-East	15.8946237564087	12.7567481994629	19.0251522064209	10.7368469238281	71.2461547851562	80
210	1993-07-29	1993	7	29	210	210	Thu	1	N-East	16.0324935913086	11.5651884078979	20.4983158111572	12.4081888198853	68.978401184082	69
211	1993-07-30	1993	7	30	211	211	Fri	1	N-East	14.0649166107178	9.16801834106445	18.9621143341064	6.36141300201416	50.5555801391602	83
212	1993-07-31	1993	7	31	212	212	Sat	1	N-East	13.9285755157471	10.828125	17.0217590332031	8.2426815032959	67.2250747680664	83
213	1993-08-01	1993	8	1	213	213	Sun	1	N-East	15.0464992523193	10.5159769058228	19.5747509002686	9.92047023773193	61.5251770019531	79
214	1993-08-02	1993	8	2	214	214	Mon	1	N-East	16.1042728424072	12.6090097427368	19.5919227600098	8.59825992584229	58.481372833252	77
215	1993-08-03	1993	8	3	215	215	Tue	1	N-East	15.1224670410156	11.9700040817261	18.2652759552002	8.17778968811035	59.2357215881348	84
216	1993-08-04	1993	8	4	216	216	Wed	1	N-East	15.4246263504028	11.8726902008057	18.9698276519775	7.7696008682251	55.8620262145996	90
217	1993-08-05	1993	8	5	217	217	Thu	1	N-East	12.972204208374	9.74326133728027	16.189489364624	10.136848449707	86.6661224365234	71
218	1993-08-06	1993	8	6	218	218	Fri	1	N-East	13.2495250701904	8.48595237731934	18.0192794799805	9.98362350463867	68.0409469604492	89
219	1993-08-07	1993	8	7	219	219	Sat	1	N-East	15.7858572006226	12.9052066802979	18.6555290222168	13.1286592483521	77.6181182861328	75
220	1993-08-08	1993	8	8	220	220	Sun	1	N-East	14.1791391372681	10.867395401001	17.4840450286865	10.8040943145752	75.4368438720703	82
221	1993-08-09	1993	8	9	221	221	Mon	1	N-East	15.7585954666138	12.8410339355469	18.6651515960693	13.863151550293	86.0912017822266	79
222	1993-08-10	1993	8	10	222	222	Tue	1	N-East	12.8614091873169	9.11064910888672	16.6101932525635	6.43039894104004	61.5151519775391	83
223	1993-08-11	1993	8	11	223	223	Wed	1	N-East	13.1169376373291	9.86739158630371	16.3591976165771	10.600001335144	91.7795333862305	68
224	1993-08-12	1993	8	12	224	224	Thu	1	N-East	11.4413776397705	8.00306510925293	14.878867149353	6.38597774505615	61.8930397033691	69
225	1993-08-13	1993	8	13	225	225	Fri	1	N-East	12.1692237854004	6.86954164505005	17.4769039154053	4.37369537353516	48.2825012207031	85
226	1993-08-14	1993	8	14	226	226	Sat	1	N-East	14.6861886978149	9.64970397949219	19.721981048584	7.99007225036621	55.5860824584961	88
227	1993-08-15	1993	8	15	227	227	Sun	1	N-East	14.5961418151855	10.9681901931763	18.2199039459229	11.1122827529907	78.5415573120117	67
228	1993-08-16	1993	8	16	228	228	Mon	1	N-East	13.6972780227661	11.2598857879639	16.1255111694336	9.51637649536133	79.2450332641602	70
229	1993-08-17	1993	8	17	229	229	Tue	1	N-East	13.5058670043945	6.80718278884888	20.2164306640625	7.61228227615356	54.8217010498047	89
230	1993-08-18	1993	8	18	230	230	Wed	1	N-East	15.1339702606201	10.149754524231	20.1198291778564	9.11637687683105	59.1251831054688	85
231	1993-08-19	1993	8	19	231	231	Thu	1	N-East	16.0741920471191	11.2104167938232	20.9326267242432	11.4982595443726	62.2673492431641	81
232	1993-08-20	1993	8	20	232	232	Fri	1	N-East	15.3140430450439	10.9835929870605	19.6428985595703	9.1450366973877	61.7023544311523	62
233	1993-08-21	1993	8	21	233	233	Sat	1	N-East	14.8721160888672	10.6129465103149	19.1330051422119	6.82047080993652	56.6088027954102	95
234	1993-08-22	1993	8	22	234	234	Sun	1	N-East	12.71617603302	9.31141090393066	16.1172637939453	4.81228303909302	64.4023590087891	74
235	1993-08-23	1993	8	23	235	235	Mon	1	N-East	9.63728332519531	5.86537218093872	13.4119176864624	5.94094133377075	68.1128997802734	90
236	1993-08-24	1993	8	24	236	236	Tue	1	N-East	11.3142423629761	8.08342933654785	14.5437316894531	4.9573187828064	61.793041229248	59
237	1993-08-25	1993	8	25	237	237	Wed	1	N-East	12.1452703475952	9.50674629211426	14.776798248291	8.98362255096436	83.264892578125	83
238	1993-08-26	1993	8	26	238	238	Thu	1	N-East	10.6650419235229	7.64113616943359	13.6832189559937	5.95731830596924	68.3087997436523	74
239	1993-08-27	1993	8	27	239	239	Fri	1	N-East	11.5770835876465	7.51565456390381	15.6383075714111	9.14912986755371	76.478401184082	70
240	1993-08-28	1993	8	28	240	240	Sat	1	N-East	14.978798866272	9.27106189727783	20.6909427642822	10.1122827529907	70.4777908325195	81
241	1993-08-29	1993	8	29	241	241	Sun	1	N-East	15.0174989700317	10.7020378112793	19.3300285339355	10.3655071258545	63.0193481445312	85
242	1993-08-30	1993	8	30	242	242	Mon	1	N-East	13.2468681335449	8.86329078674316	17.6332035064697	7.26550674438477	66.8889465332031	83
243	1993-08-31	1993	8	31	243	243	Tue	1	N-East	15.5900955200195	8.85589504241943	22.3317031860352	10.1409425735474	60.3076782226562	80
244	1993-09-01	1993	9	1	244	244	Wed	1	N-East	16.12770652771	8.446702003479	23.8182697296143	10.6696014404297	61.6690864562988	71
245	1993-09-02	1993	9	2	245	245	Thu	1	N-East	15.326376914978	11.638970375061	19.0088005065918	10.1532249450684	66.3632583618164	77
246	1993-09-03	1993	9	3	246	246	Fri	1	N-East	12.0436735153198	9.98977375030518	14.0864667892456	5.26550674438477	68.3801422119141	83
247	1993-09-04	1993	9	4	247	247	Sat	1	N-East	10.2141771316528	8.1146240234375	12.3062305450439	4.81637668609619	70.0485153198242	68
248	1993-09-05	1993	9	5	248	248	Sun	1	N-East	10.0545969009399	7.27077388763428	12.8399267196655	5.22456502914429	67.9713439941406	81
249	1993-09-06	1993	9	6	249	249	Mon	1	N-East	10.5062227249146	7.02448797225952	13.9957027435303	7.14094209671021	71.6807556152344	79
250	1993-09-07	1993	9	7	250	250	Tue	1	N-East	12.5760269165039	10.2028589248657	14.9395961761475	9.10818862915039	75.1941680908203	95
251	1993-09-08	1993	9	8	251	251	Wed	1	N-East	13.102071762085	11.5459690093994	14.6433143615723	11.6631517410278	92.3853607177734	83
252	1993-09-09	1993	9	9	252	252	Thu	1	N-East	14.8011646270752	12.1383428573608	17.4518871307373	13.6754350662231	93.4573135375977	78
253	1993-09-10	1993	9	10	253	253	Fri	1	N-East	14.0339679718018	12.4837770462036	15.5669240951538	12.8081884384155	88.76611328125	79
254	1993-09-11	1993	9	11	254	254	Sat	1	N-East	13.6659622192383	10.307861328125	17.0147380828857	8.7081880569458	66.4450378417969	81
255	1993-09-12	1993	9	12	255	255	Sun	1	N-East	10.9335327148438	6.82610177993774	15.0458526611328	8.41637706756592	75.1310043334961	85
256	1993-09-13	1993	9	13	256	256	Mon	1	N-East	12.4752788543701	11.3114004135132	13.6244897842407	10.600001335144	84.5836181640625	76
257	1993-09-14	1993	9	14	257	257	Tue	1	N-East	10.1806354522705	8.87312698364258	11.4765949249268	7.8959059715271	84.3590621948242	59
258	1993-09-15	1993	9	15	258	258	Wed	1	N-East	9.92304515838623	8.7144660949707	11.1197862625122	7.11637687683105	80.6228332519531	63
259	1993-09-16	1993	9	16	259	259	Thu	1	N-East	10.0267419815063	8.72000217437744	11.3224468231201	7.60000038146973	82.7099380493164	77
260	1993-09-17	1993	9	17	260	260	Fri	1	N-East	8.71927070617676	3.33553528785706	14.1118354797363	5.42047071456909	70.6771774291992	73
261	1993-09-18	1993	9	18	261	261	Sat	1	N-East	10.3916730880737	5.67940044403076	15.1116256713867	6.39416646957397	67.3714447021484	71
262	1993-09-19	1993	9	19	262	262	Sun	1	N-East	12.3662986755371	8.49772262573242	16.232479095459	8.0614128112793	70.9872055053711	73
263	1993-09-20	1993	9	20	263	263	Mon	1	N-East	14.6737957000732	11.615984916687	17.7248802185059	11.1286592483521	75.9579315185547	79
264	1993-09-21	1993	9	21	264	264	Tue	1	N-East	12.5713415145874	8.99487400054932	16.1421966552734	8.99825954437256	69.1427841186523	89
265	1993-09-22	1993	9	22	265	265	Wed	1	N-East	12.1963453292847	7.06422710418701	17.3302364349365	8.49007225036621	71.6772766113281	79
266	1993-09-23	1993	9	23	266	266	Thu	1	N-East	12.5023078918457	8.88323020935059	16.1162281036377	7.4081883430481	66.3480072021484	67
267	1993-09-24	1993	9	24	267	267	Fri	1	N-East	11.5336380004883	7.5233268737793	15.5438375473022	7.84913063049316	72.0421676635742	66
268	1993-09-25	1993	9	25	268	268	Sat	1	N-East	9.77992343902588	5.8029727935791	13.7613134384155	5.34503602981567	71.5146408081055	64
269	1993-09-26	1993	9	26	269	269	Sun	1	N-East	10.059009552002	6.82220077514648	13.2958850860596	5.53275346755981	68.0801467895508	96
270	1993-09-27	1993	9	27	270	270	Mon	1	N-East	8.59196662902832	6.45717763900757	10.7257623672485	3.8204710483551	67.0409393310547	87
271	1993-09-28	1993	9	28	271	271	Tue	1	N-East	6.86592483520508	2.42039322853088	11.324538230896	3.54912996292114	75.1368408203125	76
272	1993-09-29	1993	9	29	272	272	Wed	1	N-East	8.90625858306885	4.57711267471313	13.2453155517578	8.32456493377686	83.7128982543945	79
273	1993-09-30	1993	9	30	273	273	Thu	1	N-East	11.5174617767334	8.67198467254639	14.3596429824829	8.13275337219238	77.3982620239258	77
274	1993-10-01	1993	10	1	274	274	Fri	1	N-East	10.873085975647	9.00528526306152	12.7304410934448	8.11228275299072	82.7859725952148	74
275	1993-10-02	1993	10	2	275	275	Sat	1	N-East	10.7060632705688	8.12013626098633	13.285870552063	10.0327529907227	88.3228149414062	81
276	1993-10-03	1993	10	3	276	276	Sun	1	N-East	12.2449102401733	8.75582790374756	15.7300596237183	9.16141319274902	79.9205780029297	74
277	1993-10-04	1993	10	4	277	277	Mon	1	N-East	11.2977647781372	8.08759307861328	14.5047130584717	5.40409421920776	60.6187286376953	89
278	1993-10-05	1993	10	5	278	278	Tue	1	N-East	7.83098411560059	3.93442058563232	11.7350225448608	8.7795295715332	93.8935546875	76
279	1993-10-06	1993	10	6	279	279	Wed	1	N-East	10.6776113510132	8.42152786254883	12.9287643432617	9.90818881988525	88.4251708984375	80
280	1993-10-07	1993	10	7	280	280	Thu	1	N-East	12.5796957015991	10.2522974014282	14.8981142044067	10.8081884384155	84.0749206542969	76
281	1993-10-08	1993	10	8	281	281	Fri	1	N-East	8.12764739990234	3.91898822784424	12.3409280776978	7.34094190597534	86.6631546020508	94
282	1993-10-09	1993	10	9	282	282	Sat	1	N-East	9.95666694641113	7.90411996841431	12.0023164749146	10.1000003814697	94.0976486206055	77
283	1993-10-10	1993	10	10	283	283	Sun	1	N-East	10.6675710678101	7.33636236190796	13.9918260574341	7.73684787750244	75.2339859008789	99
284	1993-10-11	1993	10	11	284	284	Mon	1	N-East	10.3674182891846	7.62441253662109	13.1072235107422	8.12047100067139	81.545654296875	80
285	1993-10-12	1993	10	12	285	285	Tue	1	N-East	8.70976829528809	7.84945678710938	9.56200122833252	5.84677600860596	79.060188293457	87
286	1993-10-13	1993	10	13	286	286	Wed	1	N-East	6.52177476882935	4.57526445388794	8.466233253479	2.48771739006042	76.1830139160156	103
287	1993-10-14	1993	10	14	287	287	Thu	1	N-East	5.27645492553711	1.88103008270264	8.67788028717041	0.604094207286835	69.5052261352539	86
288	1993-10-15	1993	10	15	288	288	Fri	1	N-East	3.99865174293518	0.272394388914108	7.73339414596558	-4.13039875030518	52.7006149291992	84
289	1993-10-16	1993	10	16	289	289	Sat	1	N-East	2.46483898162842	-2.0260374546051	6.97208786010742	-4.69999980926514	56.4116668701172	91
290	1993-10-17	1993	10	17	290	290	Sun	1	N-East	4.61736345291138	-1.31759822368622	10.5731945037842	-3.39355158805847	53.4520950317383	99
291	1993-10-18	1993	10	18	291	291	Mon	1	N-East	4.21644687652588	-2.27095174789429	10.7258911132812	-1.17952919006348	60.8198547363281	99
292	1993-10-19	1993	10	19	292	292	Tue	1	N-East	5.94580888748169	0.357721596956253	11.5521478652954	1.55322432518005	68.1573181152344	90
293	1993-10-20	1993	10	20	293	293	Wed	1	N-East	7.750075340271	3.77843689918518	11.7292346954346	4.53275299072266	70.7960052490234	90
294	1993-10-21	1993	10	21	294	294	Thu	1	N-East	5.97392463684082	3.04530692100525	8.90532684326172	3.03275370597839	76.4555740356445	84
295	1993-10-22	1993	10	22	295	295	Fri	1	N-East	6.04901599884033	2.71063351631165	9.39041996002197	2.54094171524048	75.9737014770508	89
296	1993-10-23	1993	10	23	296	296	Sat	1	N-East	6.3961877822876	2.39430737495422	10.4056844711304	2.43684768676758	69.7368469238281	94
297	1993-10-24	1993	10	24	297	297	Sun	1	N-East	6.7816367149353	2.4459490776062	11.1221952438354	5.41637706756592	76.1040954589844	105
298	1993-10-25	1993	10	25	298	298	Mon	1	N-East	8.23235321044922	7.11107635498047	9.34867000579834	3.26960110664368	68.031623840332	63
299	1993-10-26	1993	10	26	299	299	Tue	1	N-East	8.34384727478027	6.98521518707275	9.6951208114624	3.93684792518616	71.1415634155273	86
300	1993-10-27	1993	10	27	300	300	Wed	1	N-East	6.37026357650757	4.76946544647217	7.96476984024048	1.13275337219238	71.5924301147461	81
301	1993-10-28	1993	10	28	301	301	Thu	1	N-East	7.02099084854126	4.76253223419189	9.27679443359375	6.05322456359863	83.8310089111328	100
302	1993-10-29	1993	10	29	302	302	Fri	1	N-East	7.75713777542114	6.85419797897339	8.65007877349854	4.32047128677368	75.8514785766602	87
303	1993-10-30	1993	10	30	303	303	Sat	1	N-East	7.23898887634277	5.95862674713135	8.51113891601562	6.3344931602478	93.8063430786133	99
304	1993-10-31	1993	10	31	304	304	Sun	1	N-East	7.74234390258789	6.61113786697388	8.8643684387207	6.21637678146362	91.0245666503906	87
305	1993-11-01	1993	11	1	305	305	Mon	1	N-East	7.71734571456909	6.95427751541138	8.47003173828125	2.72456526756287	66.5637664794922	98
306	1993-11-02	1993	11	2	306	306	Tue	1	N-East	7.47145223617554	6.7276029586792	8.20534038543701	2.82865929603577	67.6965255737305	105
307	1993-11-03	1993	11	3	307	307	Wed	1	N-East	7.84415245056152	6.2518424987793	9.42938899993896	6.51637649536133	86.3105316162109	92
308	1993-11-04	1993	11	4	308	308	Thu	1	N-East	10.2073726654053	7.63738775253296	12.7715330123901	9.29590606689453	87.8398132324219	92
309	1993-11-05	1993	11	5	309	309	Fri	1	N-East	8.73251819610596	6.38546276092529	11.0741004943848	8.3040943145752	94.9596786499023	84
310	1993-11-06	1993	11	6	310	310	Sat	1	N-East	8.64911460876465	7.57438087463379	9.7122049331665	7.72865915298462	88.5883407592773	100
311	1993-11-07	1993	11	7	311	311	Sun	1	N-East	7.97340440750122	6.99850130081177	8.93787860870361	5.73684740066528	82.4743041992188	100
312	1993-11-08	1993	11	8	312	312	Mon	1	N-East	8.21060276031494	5.79290008544922	10.6284418106079	6.3040943145752	83.939208984375	108
313	1993-11-09	1993	11	9	313	313	Tue	1	N-East	7.11009979248047	5.59173774719238	8.6242036819458	4.71637678146362	80.8432922363281	104
314	1993-11-10	1993	11	10	314	314	Wed	1	N-East	5.39663553237915	2.17754030227661	8.62005519866943	3.8204710483551	83.0514831542969	108
315	1993-11-11	1993	11	11	315	315	Thu	1	N-East	4.57553958892822	1.14029228687286	8.0179500579834	2.66315269470215	79.1912002563477	105
316	1993-11-12	1993	11	12	316	316	Fri	1	N-East	5.63154935836792	1.63511848449707	9.63528251647949	2.4081883430481	76.2999954223633	81
317	1993-11-13	1993	11	13	317	317	Sat	1	N-East	4.37538623809814	1.95333123207092	6.80330514907837	2.59764552116394	86.4660110473633	110
318	1993-11-14	1993	11	14	318	318	Sun	1	N-East	4.51371097564697	2.86557650566101	6.16127490997314	1.0918116569519	74.0567016601562	105
319	1993-11-15	1993	11	15	319	319	Mon	1	N-East	3.54227113723755	-0.305854737758636	7.40245485305786	0.320470899343491	75.0088119506836	78
320	1993-11-16	1993	11	16	320	320	Tue	1	N-East	4.69372367858887	2.26165390014648	7.13312005996704	-1.78536307811737	57.8591613769531	100
321	1993-11-17	1993	11	17	321	321	Wed	1	N-East	2.23445606231689	1.20606219768524	3.26475119590759	-0.387717485427856	80.5088043212891	117
322	1993-11-18	1993	11	18	322	322	Thu	1	N-East	1.81807434558868	0.194014772772789	3.44625878334045	-0.591811656951904	81.4836273193359	93
323	1993-11-19	1993	11	19	323	323	Fri	1	N-East	1.61728525161743	-0.203102678060532	3.44478535652161	-0.695905804634094	78.2719573974609	99
324	1993-11-20	1993	11	20	324	324	Sat	1	N-East	0.437783271074295	-3.58656358718872	4.47820568084717	-0.867246568202972	83.3671417236328	88
325	1993-11-21	1993	11	21	325	325	Sun	1	N-East	1.26462352275848	-0.425257563591003	2.95733952522278	-0.0245650596916676	89.3431930541992	94
326	1993-11-22	1993	11	22	326	326	Mon	1	N-East	0.64415717124939	-0.929120540618896	2.21913456916809	-0.583623349666595	90.2789077758789	108
327	1993-11-23	1993	11	23	327	327	Tue	1	N-East	-1.53241527080536	-3.21243119239807	0.153737604618073	-2.0918116569519	91.9525985717773	112
328	1993-11-24	1993	11	24	328	328	Wed	1	N-East	-4.73285675048828	-9.93027400970459	0.488271802663803	-6.29007148742676	92.4724655151367	103
329	1993-11-25	1993	11	25	329	329	Thu	1	N-East	0.181069865822792	-4.60769748687744	4.99256229400635	0.563152492046356	93.9368438720703	98
330	1993-11-26	1993	11	26	330	330	Fri	1	N-East	1.26591789722443	-2.62867736816406	5.17133951187134	-1.19590580463409	85.5491256713867	115
331	1993-11-27	1993	11	27	331	331	Sat	1	N-East	0.269674688577652	-3.34542226791382	3.89464950561523	2.02047085762024	95.2818832397461	103
332	1993-11-28	1993	11	28	332	332	Sun	1	N-East	2.79712224006653	1.41941118240356	4.17221736907959	0.957318425178528	80.2795257568359	105
333	1993-11-29	1993	11	29	333	333	Mon	1	N-East	0.738988995552063	-0.752397119998932	2.23333621025085	-2.92630481719971	72.2251815795898	114
334	1993-11-30	1993	11	30	334	334	Tue	1	N-East	2.09144902229309	-0.086975984275341	4.2731409072876	1.91637670993805	93.9573211669922	96
335	1993-12-01	1993	12	1	335	335	Wed	1	N-East	5.19143867492676	1.08583164215088	9.30369091033936	2.81637644767761	84.1661148071289	124
336	1993-12-02	1993	12	2	336	336	Thu	1	N-East	8.70686817169189	5.08332967758179	12.3324165344238	5.59999990463257	69.4766616821289	104
337	1993-12-03	1993	12	3	337	337	Fri	1	N-East	10.5788221359253	9.27810668945312	11.8685827255249	7.45322418212891	79.0404357910156	130
338	1993-12-04	1993	12	4	338	338	Sat	1	N-East	7.4091362953186	4.69176769256592	10.1270895004272	1.90409421920776	74.8777923583984	127
339	1993-12-05	1993	12	5	339	339	Sun	1	N-East	7.70290088653564	5.53289651870728	9.87171745300293	4.60818862915039	74.6228256225586	108
340	1993-12-06	1993	12	6	340	340	Mon	1	N-East	8.20569610595703	6.38840579986572	10.0179147720337	3.84094190597534	68.833366394043	106
341	1993-12-07	1993	12	7	341	341	Tue	1	N-East	4.60774660110474	2.2037250995636	7.01187610626221	0.354964077472687	82.7215957641602	105
342	1993-12-08	1993	12	8	342	342	Wed	1	N-East	4.90548324584961	0.811930775642395	9.0039644241333	2.08771729469299	90.6321411132812	113
343	1993-12-09	1993	12	9	343	343	Thu	1	N-East	5.26595592498779	2.34730625152588	8.18737697601318	1.49590599536896	68.8187255859375	110
344	1993-12-10	1993	12	10	344	344	Fri	1	N-East	5.10510683059692	3.11668586730957	7.09059476852417	2	75.9047012329102	102
345	1993-12-11	1993	12	11	345	345	Sat	1	N-East	3.21232581138611	1.72163307666779	4.70012807846069	-0.479529112577438	72.2608947753906	95
346	1993-12-12	1993	12	12	346	346	Sun	1	N-East	1.6505925655365	-0.864642322063446	4.17223787307739	-0.242681547999382	88.7637634277344	108
347	1993-12-13	1993	12	13	347	347	Mon	1	N-East	3.04245853424072	1.15915977954865	4.92694091796875	-0.604094207286835	69.3894500732422	103
348	1993-12-14	1993	12	14	348	348	Tue	1	N-East	0.940235435962677	-1.48206317424774	3.37218594551086	-2.96315240859985	71.2251815795898	112
349	1993-12-15	1993	12	15	349	349	Wed	1	N-East	2.70699906349182	0.720370888710022	4.69868087768555	0.791811645030975	79.2982635498047	104
350	1993-12-16	1993	12	16	350	350	Thu	1	N-East	3.32354617118835	1.42714893817902	5.21955585479736	-0.508188366889954	74.1058349609375	108
351	1993-12-17	1993	12	17	351	351	Fri	1	N-East	4.73082685470581	1.78503167629242	7.6822247505188	0.33858734369278	77.1426773071289	102
352	1993-12-18	1993	12	18	352	352	Sat	1	N-East	8.15369606018066	3.70369076728821	12.6161756515503	7.7795295715332	81.2064514160156	110
353	1993-12-19	1993	12	19	353	353	Sun	1	N-East	7.82900094985962	5.08345508575439	10.5727987289429	2.63449335098267	69.6993865966797	101
354	1993-12-20	1993	12	20	354	354	Mon	1	N-East	1.03918242454529	-0.802878141403198	2.885822057724	-2.46960115432739	76.2894592285156	89
355	1993-12-21	1993	12	21	355	355	Tue	1	N-East	0.336791694164276	-3.02551555633545	3.71476078033447	-4.62047100067139	64.6754302978516	88
356	1993-12-22	1993	12	22	356	356	Wed	1	N-East	2.27782320976257	-0.248073145747185	4.81058931350708	1.52456510066986	87.7088012695312	105
357	1993-12-23	1993	12	23	357	357	Thu	1	N-East	1.99203407764435	0.671420454978943	3.31263113021851	0.287717491388321	82.9047088623047	103
358	1993-12-24	1993	12	24	358	358	Fri	1	N-East	2.17284488677979	0.872727394104004	3.47241616249084	-0.887717485427856	78.4573211669922	99
359	1993-12-25	1993	12	25	359	359	Sat	1	N-East	1.12691068649292	-0.323759317398071	2.57857894897461	-0.01637670584023	90.3871078491211	111
360	1993-12-26	1993	12	26	360	360	Sun	1	N-East	0.872101902961731	-0.223032563924789	1.96985590457916	-1.05905830860138	85.7444229125977	83
361	1993-12-27	1993	12	27	361	361	Mon	1	N-East	1.202845454216	-0.298627227544785	2.70981884002686	0.612282514572144	89.4719619750977	95
362	1993-12-28	1993	12	28	362	362	Tue	1	N-East	0.921064674854279	-1.02432692050934	2.87205672264099	0.328659236431122	93.8450393676758	97
363	1993-12-29	1993	12	29	363	363	Wed	1	N-East	2.8666684627533	-1.33107841014862	7.07201862335205	1.32456517219543	78.3842391967773	100
364	1993-12-30	1993	12	30	364	364	Thu	1	N-East	2.96627640724182	1.14728045463562	4.78748989105225	0.591811656951904	81.4398193359375	97
365	1993-12-31	1993	12	31	365	365	Fri	1	N-East	1.28624880313873	-1.17563211917877	3.84751033782959	-0.253224283456802	88.3847503662109	126
366	1994-01-01	1994	1	1	366	1	Sat	1	N-East	1.80702543258667	-1.28602933883667	4.90635347366333	0.359058231115341	81.7883224487305	116
367	1994-01-02	1994	1	2	367	2	Sun	1	N-East	2.52155423164368	-0.0018896737601608	5.04744243621826	1.68362331390381	90.1426773071289	99
368	1994-01-03	1994	1	3	368	3	Mon	1	N-East	2.94649767875671	1.58796918392181	4.30662775039673	2.80818819999695	92.0777893066406	93
369	1994-01-04	1994	1	4	369	4	Tue	1	N-East	1.29745471477509	-0.731675028800964	3.32861018180847	1.12630498409271	92.0134124755859	110
370	1994-01-05	1994	1	5	370	5	Wed	1	N-East	1.53275012969971	-0.625575482845306	3.69381213188171	1.90000009536743	89.1993865966797	102
371	1994-01-06	1994	1	6	371	6	Thu	1	N-East	2.65674138069153	0.614619076251984	4.6981348991394	1.01228249073029	86.2538375854492	104
372	1994-01-07	1994	1	7	372	7	Fri	1	N-East	2.93600463867188	1.20605373382568	4.66527318954468	2.41637682914734	85.3982696533203	113
373	1994-01-08	1994	1	8	373	8	Sat	1	N-East	0.6343754529953	-2.12445116043091	3.4005765914917	-1.10000002384186	86.6105422973633	93
374	1994-01-09	1994	1	9	374	9	Sun	1	N-East	3.4802417755127	-0.325760215520859	7.29989099502563	4.20818853378296	93.4900665283203	94
375	1994-01-10	1994	1	10	375	10	Mon	1	N-East	5.50620555877686	4.51738166809082	6.48826885223389	4.91637706756592	89.1193466186523	127
376	1994-01-11	1994	1	11	376	11	Tue	1	N-East	5.40029287338257	4.33622980117798	6.4583477973938	4.80000019073486	91.3736953735352	96
377	1994-01-12	1994	1	12	377	12	Wed	1	N-East	6.61449909210205	3.35981297492981	9.87135314941406	4.24268198013306	81.9666290283203	108
378	1994-01-13	1994	1	13	378	13	Thu	1	N-East	6.27352905273438	4.54219484329224	7.99898862838745	2.87543511390686	74.7321395874023	112
379	1994-01-14	1994	1	14	379	14	Fri	1	N-East	6.21850967407227	4.80674123764038	7.62331295013428	1.97543501853943	74.309928894043	94
380	1994-01-15	1994	1	15	380	15	Sat	1	N-East	3.2619948387146	0.692241787910461	5.83840799331665	1.48362326622009	87.8467712402344	94
381	1994-01-16	1994	1	16	381	16	Sun	1	N-East	1.51829791069031	-0.392018139362335	3.43553972244263	-1.64503598213196	78.7502517700195	90
382	1994-01-17	1994	1	17	382	17	Mon	1	N-East	1.38785362243652	-1.81889474391937	4.60905647277832	-0.0965204611420631	94.0290603637695	94
383	1994-01-18	1994	1	18	383	18	Tue	1	N-East	4.67279243469238	1.0490266084671	8.31449794769287	2.93684768676758	74.5357131958008	103
384	1994-01-19	1994	1	19	384	19	Wed	1	N-East	3.84985399246216	0.422140717506409	7.28565454483032	-2.00409412384033	67.0784072875977	109
385	1994-01-20	1994	1	20	385	20	Thu	1	N-East	5.87619638442993	2.01673579216003	9.74470901489258	5.37952899932861	82.9105453491211	92
386	1994-01-21	1994	1	21	386	21	Fri	1	N-East	7.80890703201294	5.53117895126343	10.0797357559204	5.62047100067139	72.7152481079102	90
387	1994-01-22	1994	1	22	387	22	Sat	1	N-East	6.27546358108521	3.81039881706238	8.73973178863525	1.08771753311157	66.8146362304688	93
388	1994-01-23	1994	1	23	388	23	Sun	1	N-East	5.35899639129639	3.20783925056458	7.51151561737061	-1.28188359737396	66.9356231689453	101
389	1994-01-24	1994	1	24	389	24	Mon	1	N-East	5.09986686706543	2.54180335998535	7.65963459014893	0.600000023841858	74.6988754272461	94
390	1994-01-25	1994	1	25	390	25	Tue	1	N-East	6.15415811538696	3.27916097640991	9.03515625	2.52630496025085	71.1228256225586	89
391	1994-01-26	1994	1	26	391	26	Wed	1	N-East	5.22603464126587	1.88957178592682	8.5669116973877	-0.300000011920929	67.8163833618164	80
392	1994-01-27	1994	1	27	392	27	Thu	1	N-East	4.81138181686401	2.10684084892273	7.51958703994751	-0.616376757621765	67.6409378051758	80
393	1994-01-28	1994	1	28	393	28	Fri	1	N-East	2.19785141944885	0.527382016181946	3.87046718597412	-7.12221050262451	50.7766647338867	82
394	1994-01-29	1994	1	29	394	29	Sat	1	N-East	4.68917226791382	-0.490488886833191	9.89108467102051	3.09999990463257	77.6661224365234	98
395	1994-01-30	1994	1	30	395	30	Sun	1	N-East	5.882239818573	3.31554079055786	8.45325660705566	-0.469600975513458	66.1438064575195	105
396	1994-01-31	1994	1	31	396	31	Mon	1	N-East	5.31170558929443	3.73133516311646	6.88870334625244	0.616376757621765	68.6684799194336	115
397	1994-02-01	1994	2	1	397	32	Tue	1	N-East	6.21604156494141	3.95489144325256	8.47311210632324	4.90818881988525	86.0999984741211	95
398	1994-02-02	1994	2	2	398	33	Wed	1	N-East	3.75573468208313	1.18718290328979	6.33110475540161	-0.879529058933258	68.9637756347656	94
399	1994-02-03	1994	2	3	399	34	Thu	1	N-East	1.84748041629791	-1.38632774353027	5.09759426116943	-1.19181168079376	69.9672393798828	104
400	1994-02-04	1994	2	4	400	35	Fri	1	N-East	5.09987783432007	2.08215999603271	8.12226390838623	2.57369518280029	72.2632522583008	98
401	1994-02-05	1994	2	5	401	36	Sat	1	N-East	5.08839845657349	3.01270318031311	7.16232776641846	3.10818839073181	84.7702255249023	99
402	1994-02-06	1994	2	6	402	37	Sun	1	N-East	3.21355891227722	0.738906741142273	5.69471549987793	2.18362331390381	89.7713394165039	84
403	1994-02-07	1994	2	7	403	38	Mon	1	N-East	3.81515097618103	1.05410635471344	6.58836126327515	0.932753384113312	78.2561950683594	92
404	1994-02-08	1994	2	8	404	39	Tue	1	N-East	3.44079732894897	0.615073323249817	6.27574491500854	0.983623325824738	79.7333755493164	79
405	1994-02-09	1994	2	9	405	40	Wed	1	N-East	4.98847723007202	2.80997228622437	7.16716051101685	0.224565073847771	68.2473907470703	86
406	1994-02-10	1994	2	10	406	41	Thu	1	N-East	5.01018047332764	1.84462869167328	8.18965435028076	-0.412282526493073	65.008186340332	85
407	1994-02-11	1994	2	11	407	42	Fri	1	N-East	3.66695380210876	1.78054237365723	5.56076622009277	1.54094183444977	80.5883331298828	89
408	1994-02-12	1994	2	12	408	43	Sat	1	N-East	3.60291624069214	1.80961990356445	5.39825201034546	-1.45086991786957	67.3169937133789	89
409	1994-02-13	1994	2	13	409	44	Sun	1	N-East	1.47781157493591	0.194429263472557	2.76137042045593	-4.15086984634399	63.3310165405273	87
410	1994-02-14	1994	2	14	410	45	Mon	1	N-East	0.189990878105164	-0.880069971084595	1.26369047164917	-3.76724672317505	72.6982574462891	101
411	1994-02-15	1994	2	15	411	46	Tue	1	N-East	-0.23875917494297	-1.48995280265808	1.01606392860413	-2.94677567481995	78.2924194335938	83
412	1994-02-16	1994	2	16	412	47	Wed	1	N-East	-0.610775768756866	-2.21953248977661	1.00838601589203	-1.39181160926819	89.1122894287109	100
413	1994-02-17	1994	2	17	413	48	Thu	1	N-East	-1.15481579303741	-5.68060541152954	3.40363311767578	-2.39181160926819	84.8888397216797	98
414	1994-02-18	1994	2	18	414	49	Fri	1	N-East	1.471031665802	-1.5204062461853	4.48598718643188	-0.546775698661804	74.2555770874023	71
415	1994-02-19	1994	2	19	415	50	Sat	1	N-East	-0.00612337933853269	-3.53811836242676	3.54372930526733	-2.45905828475952	75.8473892211914	81
416	1994-02-20	1994	2	20	416	51	Sun	1	N-East	0.358602821826935	-1.13776707649231	1.86322498321533	-2.20000004768372	78.2362289428711	83
417	1994-02-21	1994	2	21	417	52	Mon	1	N-East	-1.44872081279755	-4.08177852630615	1.20374059677124	-4.56724691390991	74.8491363525391	98
418	1994-02-22	1994	2	22	418	53	Tue	1	N-East	-2.11705017089844	-6.77777576446533	2.57466053962708	-2.35731840133667	88.6238403320312	88
419	1994-02-23	1994	2	23	419	54	Wed	1	N-East	-0.58643651008606	-3.26225137710571	2.11092710494995	-3.35086965560913	67.6801452636719	84
420	1994-02-24	1994	2	24	420	55	Thu	1	N-East	1.12543284893036	-0.375790685415268	2.62966203689575	-2.17134070396423	71.3695983886719	84
421	1994-02-25	1994	2	25	421	56	Fri	1	N-East	-0.47338405251503	-4.40108585357666	3.47722935676575	-3.47308039665222	75.3661193847656	102
422	1994-02-26	1994	2	26	422	57	Sat	1	N-East	1.82617700099945	-1.79465770721436	5.46420764923096	2.3204710483551	90.9415588378906	94
423	1994-02-27	1994	2	27	423	58	Sun	1	N-East	4.92832231521606	2.41144919395447	7.44783306121826	5.67952871322632	94.408805847168	73
424	1994-02-28	1994	2	28	424	59	Mon	1	N-East	5.12415075302124	3.4845552444458	6.76225090026855	4.42047119140625	87.2298889160156	96
425	1994-03-01	1994	3	1	425	60	Tue	1	N-East	4.35150718688965	2.4214015007019	6.28127861022949	1.75322425365448	80.197135925293	94
426	1994-03-02	1994	3	2	426	61	Wed	1	N-East	5.61456394195557	1.9298951625824	9.30805015563965	2.79590559005737	78.3730773925781	107
427	1994-03-03	1994	3	3	427	62	Thu	1	N-East	5.82103872299194	3.70511293411255	7.9368839263916	1.17952919006348	70.1040954589844	87
428	1994-03-04	1994	3	4	428	63	Fri	1	N-East	7.34831523895264	3.46212601661682	11.2404336929321	2.2573184967041	72.5135116577148	82
429	1994-03-05	1994	3	5	429	64	Sat	1	N-East	7.86694383621216	4.37268018722534	11.3632850646973	1.43684756755829	57.3128967285156	74
430	1994-03-06	1994	3	6	430	65	Sun	1	N-East	7.19058704376221	3.97370576858521	10.4105672836304	2.64913034439087	67.6316299438477	78
431	1994-03-07	1994	3	7	431	66	Mon	1	N-East	9.61651039123535	7.32061100006104	11.9090909957886	4.12456464767456	63.1064491271973	90
432	1994-03-08	1994	3	8	432	67	Tue	1	N-East	11.0265674591064	8.6839017868042	13.3582363128662	7.34913015365601	72.8801422119141	97
433	1994-03-09	1994	3	9	433	68	Wed	1	N-East	6.93531036376953	4.99480533599854	8.87197303771973	-0.405833929777145	56.6199607849121	79
434	1994-03-10	1994	3	10	434	69	Thu	1	N-East	6.98946285247803	4.28073596954346	9.70019054412842	-0.830398976802826	55.2784042358398	85
435	1994-03-11	1994	3	11	435	70	Fri	1	N-East	6.59109497070312	5.07839775085449	8.09587669372559	1.24503600597382	64.9749221801758	91
436	1994-03-12	1994	3	12	436	71	Sat	1	N-East	5.03367042541504	2.07923984527588	7.9920334815979	-1.30409419536591	61.9269180297852	99
437	1994-03-13	1994	3	13	437	72	Sun	1	N-East	6.70639419555664	3.50708723068237	9.9101676940918	-2.9713408946991	49.5105438232422	90
438	1994-03-14	1994	3	14	438	73	Mon	1	N-East	8.60422992706299	4.18142175674438	13.0337047576904	3.40000009536743	58.7128982543945	91
439	1994-03-15	1994	3	15	439	74	Tue	1	N-East	5.31726217269897	2.63865423202515	8.00143337249756	-0.179529115557671	64.288330078125	83
440	1994-03-16	1994	3	16	440	75	Wed	1	N-East	3.59148263931274	1.30898237228394	5.87553834915161	-1.71637666225433	66.5426788330078	89
441	1994-03-17	1994	3	17	441	76	Thu	1	N-East	4.13970279693604	0.841112017631531	7.44733619689941	-1.575434923172	60.4204750061035	92
442	1994-03-18	1994	3	18	442	77	Fri	1	N-East	3.75902915000916	1.73540818691254	5.78409719467163	1.38362324237823	79.0918121337891	89
443	1994-03-19	1994	3	19	443	78	Sat	1	N-East	4.55248785018921	0.30913308262825	8.81213188171387	-1.32108545303345	61.8647880554199	90
444	1994-03-20	1994	3	20	444	79	Sun	1	N-East	3.89569759368896	0.789407432079315	7.01213121414185	0.27308052778244	74.3893508911133	90
445	1994-03-21	1994	3	21	445	80	Mon	1	N-East	4.15172386169434	-0.62714421749115	8.94631195068359	-3.31637644767761	54.6678619384766	90
446	1994-03-22	1994	3	22	446	81	Tue	1	N-East	9.57447624206543	4.86364793777466	14.2978343963623	4.24913024902344	55.2135124206543	104
447	1994-03-23	1994	3	23	447	82	Wed	1	N-East	10.1771774291992	7.35621070861816	12.9911880493164	7.6040940284729	76.9181137084961	87
448	1994-03-24	1994	3	24	448	83	Thu	1	N-East	6.70746564865112	4.39764976501465	9.01955604553223	-0.195905819535255	59.1508712768555	95
449	1994-03-25	1994	3	25	449	84	Fri	1	N-East	7.40394115447998	4.5601487159729	10.2462940216064	1.16141271591187	63.9269180297852	81
450	1994-03-26	1994	3	26	450	85	Sat	1	N-East	5.26262617111206	1.0456120967865	9.49366569519043	-4.40583419799805	48.1152496337891	89
451	1994-03-27	1994	3	27	451	86	Sun	1	N-East	4.24487495422363	0.558184027671814	7.94883871078491	-1.02221071720123	62.8872108459473	86
452	1994-03-28	1994	3	28	452	87	Mon	1	N-East	8.38684558868408	4.14776563644409	12.6345300674438	4.43275356292725	67.4678649902344	82
453	1994-03-29	1994	3	29	453	88	Tue	1	N-East	8.58043098449707	5.55504512786865	11.6048622131348	-0.9549640417099	50.2456474304199	84
454	1994-03-30	1994	3	30	454	89	Wed	1	N-East	7.43343591690063	3.221027135849	11.651967048645	2.94913005828857	66.6251831054688	85
455	1994-03-31	1994	3	31	455	90	Thu	1	N-East	7.11643218994141	3.84986662864685	10.3894081115723	0.632753431797028	58.8801422119141	84
456	1994-04-01	1994	4	1	456	91	Fri	1	N-East	6.54204797744751	3.81313943862915	9.27406978607178	0.916376650333405	61.0853652954102	92
457	1994-04-02	1994	4	2	457	92	Sat	1	N-East	4.7206916809082	2.15405654907227	7.29158735275269	-1.39416599273682	64.3835144042969	84
458	1994-04-03	1994	4	3	458	93	Sun	1	N-East	4.82623147964478	1.36536455154419	8.29284572601318	5.57891416549683	98.0348968505859	70
459	1994-04-04	1994	4	4	459	94	Mon	1	N-East	5.26952457427979	2.46853375434875	8.07583045959473	-3.361412525177	55.5069580078125	68
460	1994-04-05	1994	4	5	460	95	Tue	1	N-East	4.74537372589111	1.39782643318176	8.10429096221924	-0.879529058933258	61.2853660583496	74
461	1994-04-06	1994	4	6	461	96	Wed	1	N-East	5.77950525283813	2.02056312561035	9.54846286773682	-2.02630472183228	53.5906867980957	69
462	1994-04-07	1994	4	7	462	97	Thu	1	N-East	4.53164911270142	2.29217123985291	6.77099847793579	2.64913034439087	89.4918060302734	77
463	1994-04-08	1994	4	8	463	98	Fri	1	N-East	3.36201357841492	0.475430339574814	6.25712394714355	1.52047097682953	78.6047058105469	72
464	1994-04-09	1994	4	9	464	99	Sat	1	N-East	3.22464275360107	-0.103783302009106	6.5573468208313	-2.25905823707581	60.515251159668	66
465	1994-04-10	1994	4	10	465	100	Sun	1	N-East	5.76359891891479	1.53736245632172	9.99982357025146	0.610542774200439	64.7790222167969	67
466	1994-04-11	1994	4	11	466	101	Mon	1	N-East	5.90681838989258	-1.26973593235016	13.109489440918	0.75322425365448	56.8105392456055	60
467	1994-04-12	1994	4	12	467	102	Tue	1	N-East	7.15547895431519	5.65184831619263	8.65401840209961	4.36724662780762	83.9174957275391	80
468	1994-04-13	1994	4	13	468	103	Wed	1	N-East	6.26323413848877	3.03348684310913	9.49788475036621	-0.530399024486542	56.3029670715332	71
469	1994-04-14	1994	4	14	469	104	Thu	1	N-East	5.21526336669922	2.65827226638794	7.77395820617676	-1.42221069335938	58.3012313842773	81
470	1994-04-15	1994	4	15	470	105	Fri	1	N-East	5.65647029876709	3.60896849632263	7.70272636413574	0.349130123853683	66.1169891357422	74
471	1994-04-16	1994	4	16	471	106	Sat	1	N-East	5.79316902160645	1.8587144613266	9.73259925842285	2.06960105895996	71.394775390625	77
472	1994-04-17	1994	4	17	472	107	Sun	1	N-East	6.22328233718872	4.07273864746094	8.37170028686523	-0.246775716543198	61.8070602416992	83
473	1994-04-18	1994	4	18	473	108	Mon	1	N-East	4.74699068069458	0.43946248292923	9.06293773651123	1.20000004768372	65.4818801879883	92
474	1994-04-19	1994	4	19	474	109	Tue	1	N-East	8.47028923034668	4.68328475952148	12.2606267929077	0.4549640417099	53.2888412475586	72
475	1994-04-20	1994	4	20	475	110	Wed	1	N-East	6.59582662582397	3.80182886123657	9.38934516906738	5.67134046554565	89.4713363647461	101
476	1994-04-21	1994	4	21	476	111	Thu	1	N-East	5.81224250793457	2.21966338157654	9.41386795043945	4.30000019073486	82.598258972168	81
477	1994-04-22	1994	4	22	477	112	Fri	1	N-East	9.22803688049316	6.04293870925903	12.4166126251221	6.87543535232544	77.3736953735352	82
478	1994-04-23	1994	4	23	478	113	Sat	1	N-East	10.008584022522	6.65408658981323	13.3595161437988	7.47134065628052	79.3550643920898	76
479	1994-04-24	1994	4	24	479	114	Sun	1	N-East	11.2999429702759	6.72625064849854	15.877631187439	4.39416646957397	55.8043022155762	91
480	1994-04-25	1994	4	25	480	115	Mon	1	N-East	7.79798984527588	3.67356133460999	11.9300498962402	2.74094176292419	72.0187301635742	76
481	1994-04-26	1994	4	26	481	116	Tue	1	N-East	10.4715461730957	5.16153764724731	15.7920026779175	-1.34032714366913	36.1649932861328	90
482	1994-04-27	1994	4	27	482	117	Wed	1	N-East	12.9120540618896	9.3475399017334	16.4740257263184	7.82456541061401	61.087718963623	70
483	1994-04-28	1994	4	28	483	118	Thu	1	N-East	14.1190528869629	12.4609975814819	15.7650632858276	8.9777889251709	68.9579315185547	76
484	1994-04-29	1994	4	29	484	119	Fri	1	N-East	15.396993637085	10.607292175293	20.1857891082764	8.06960105895996	55.4094161987305	79
485	1994-04-30	1994	4	30	485	120	Sat	1	N-East	10.530294418335	6.8512659072876	14.2107839584351	2.35731840133667	53.0023574829102	96
486	1994-05-01	1994	5	1	486	121	Sun	1	N-East	7.86638879776001	4.42626857757568	11.3118324279785	2.84094190597534	64.2626419067383	88
487	1994-05-02	1994	5	2	487	122	Mon	1	N-East	11.3453826904297	6.57895231246948	16.1107692718506	6.6736946105957	65.5054321289062	69
488	1994-05-03	1994	5	3	488	123	Tue	1	N-East	8.68102073669434	3.83554410934448	13.5289287567139	5.02456521987915	75.07666015625	79
489	1994-05-04	1994	5	4	489	124	Wed	1	N-East	10.0607404708862	7.57962608337402	12.5397787094116	4.05731868743896	64.0696029663086	78
490	1994-05-05	1994	5	5	490	125	Thu	1	N-East	8.66402530670166	5.53624820709229	11.7922353744507	4.7081880569458	71.4251708984375	81
491	1994-05-06	1994	5	6	491	126	Fri	1	N-East	10.0527763366699	6.2362208366394	13.8704319000244	-1.54032707214355	38.4609031677246	81
492	1994-05-07	1994	5	7	492	127	Sat	1	N-East	9.86150074005127	5.90761661529541	13.8188152313232	3.44329619407654	57.8750267028809	93
493	1994-05-08	1994	5	8	493	128	Sun	1	N-East	9.93701171875	4.92292213439941	14.9589357376099	2.97778940200806	57.007682800293	77
494	1994-05-09	1994	5	9	494	129	Mon	1	N-East	9.01847267150879	3.32931542396545	14.7175855636597	3.65967297554016	58.3276405334473	75
495	1994-05-10	1994	5	10	495	130	Tue	1	N-East	9.26322841644287	5.14646816253662	13.3796348571777	6.12865924835205	74.9053268432617	66
496	1994-05-11	1994	5	11	496	131	Wed	1	N-East	9.32321834564209	5.55067300796509	13.0937089920044	6.12865924835205	78.7193450927734	74
497	1994-05-12	1994	5	12	497	132	Thu	1	N-East	11.4911947250366	7.90185117721558	15.0771799087524	7.29590606689453	66.4234390258789	76
498	1994-05-13	1994	5	13	498	133	Fri	1	N-East	10.6713104248047	6.68802738189697	14.6573209762573	8.09590625762939	74.9310150146484	76
499	1994-05-14	1994	5	14	499	134	Sat	1	N-East	10.095067024231	7.04238748550415	13.1455125808716	7.31637668609619	78.3210830688477	78
500	1994-05-15	1994	5	15	500	135	Sun	1	N-East	7.59913444519043	6.67535591125488	8.51473999023438	5.87543487548828	88.6952972412109	99
501	1994-05-16	1994	5	16	501	136	Mon	1	N-East	7.8501296043396	5.79624223709106	9.89948177337646	0.75322425365448	60.700611114502	66
502	1994-05-17	1994	5	17	502	137	Tue	1	N-East	7.43500471115112	5.55544662475586	9.30893135070801	-0.373080551624298	57.5257911682129	67
503	1994-05-18	1994	5	18	503	138	Wed	1	N-East	6.66522216796875	4.32280254364014	9.00771522521973	-1.53039908409119	54.1269187927246	80
504	1994-05-19	1994	5	19	504	139	Thu	1	N-East	5.88968706130981	2.83869194984436	8.94315147399902	-2.58536314964294	48.750358581543	90
505	1994-05-20	1994	5	20	505	140	Fri	1	N-East	7.46064901351929	5.24616384506226	9.67191886901855	0.928659200668335	62.9859771728516	84
506	1994-05-21	1994	5	21	506	141	Sat	1	N-East	9.48340892791748	6.64513254165649	12.3179502487183	5.76141214370728	74.9831161499023	83
507	1994-05-22	1994	5	22	507	142	Sun	1	N-East	8.18756198883057	7.44170618057251	8.9200439453125	6.6040940284729	87.6958999633789	71
508	1994-05-23	1994	5	23	508	143	Mon	1	N-East	7.97050809860229	6.45240306854248	9.47954177856445	4.32047128677368	76.4696044921875	86
509	1994-05-24	1994	5	24	509	144	Tue	1	N-East	7.83914995193481	5.62988901138306	10.0447120666504	1.44913005828857	62.1439094543457	75
510	1994-05-25	1994	5	25	510	145	Wed	1	N-East	8.71559524536133	5.82336330413818	11.6064653396606	3.72456526756287	68.6982574462891	91
511	1994-05-26	1994	5	26	511	146	Thu	1	N-East	7.24578380584717	4.20838260650635	10.2851305007935	0.890071868896484	58.0070610046387	76
512	1994-05-27	1994	5	27	512	147	Fri	1	N-East	7.68079566955566	4.25414562225342	11.1123743057251	1.28597772121429	60.2128944396973	89
513	1994-05-28	1994	5	28	513	148	Sat	1	N-East	6.48721504211426	0.753419160842896	12.2317113876343	-0.438587367534637	50.549747467041	75
514	1994-05-29	1994	5	29	514	149	Sun	1	N-East	10.0731430053711	6.59744691848755	13.5474491119385	1.73275339603424	52.9473876953125	91
515	1994-05-30	1994	5	30	515	150	Mon	1	N-East	11.7762279510498	6.24803161621094	17.3111209869385	2.23275327682495	42.4836235046387	80
516	1994-05-31	1994	5	31	516	151	Tue	1	N-East	12.0944738388062	9.13101959228516	15.0491065979004	7.32047128677368	70.0760498046875	72
517	1994-06-01	1994	6	1	517	152	Wed	1	N-East	13.9727821350098	8.54695892333984	19.4019508361816	9.04677581787109	60.1234397888184	81
518	1994-06-02	1994	6	2	518	153	Thu	1	N-East	12.9238710403442	8.95608043670654	16.8925037384033	8.90992832183838	68.7573165893555	72
519	1994-06-03	1994	6	3	519	154	Fri	1	N-East	12.8968276977539	10.3673515319824	15.4174919128418	8.95496463775635	74.6227188110352	74
520	1994-06-04	1994	6	4	520	155	Sat	1	N-East	10.8064908981323	7.71337366104126	13.8964977264404	2.99764561653137	60.4039916992188	92
521	1994-06-05	1994	6	5	521	156	Sun	1	N-East	10.3422765731812	5.6221752166748	15.0706787109375	1.88362336158752	47.5830116271973	82
522	1994-06-06	1994	6	6	522	157	Mon	1	N-East	13.1218585968018	9.38800811767578	16.8506164550781	10.1163768768311	69.3859786987305	79
523	1994-06-07	1994	6	7	523	158	Tue	1	N-East	13.8548307418823	10.6335020065308	17.0708465576172	3.62691950798035	47.6287651062012	80
524	1994-06-08	1994	6	8	524	159	Wed	1	N-East	9.79487133026123	5.54823923110962	14.0492353439331	2.26724648475647	50.4584465026855	89
525	1994-06-09	1994	6	9	525	160	Thu	1	N-East	10.90358543396	6.6154522895813	15.1950359344482	6.76315212249756	64.8087005615234	84
526	1994-06-10	1994	6	10	526	161	Fri	1	N-East	11.0603551864624	7.64972639083862	14.4690589904785	2.40644860267639	53.5865898132324	80
527	1994-06-11	1994	6	11	527	162	Sat	1	N-East	11.9799127578735	7.64637470245361	16.3148670196533	6.26550674438477	60.9561920166016	82
528	1994-06-12	1994	6	12	528	163	Sun	1	N-East	14.70960521698	10.182933807373	19.2350120544434	8.12047100067139	60.9070625305176	89
529	1994-06-13	1994	6	13	529	164	Mon	1	N-East	16.8806648254395	9.57372760772705	24.1954460144043	11.1754350662231	59.0468826293945	68
530	1994-06-14	1994	6	14	530	165	Tue	1	N-East	13.3578186035156	9.11720180511475	17.5978050231934	3.58362317085266	48.6567039489746	67
531	1994-06-15	1994	6	15	531	166	Wed	1	N-East	11.3216390609741	7.93896532058716	14.7032508850098	6.40818881988525	63.4993896484375	80
532	1994-06-16	1994	6	16	532	167	Thu	1	N-East	10.9239521026611	8.7969217300415	13.0403747558594	8.53039932250977	86.9000015258789	82
533	1994-06-17	1994	6	17	533	168	Fri	1	N-East	12.3548517227173	7.89453077316284	16.8129463195801	8.07778930664062	65.183723449707	78
534	1994-06-18	1994	6	18	534	169	Sat	1	N-East	13.1938161849976	10.8770790100098	15.5003366470337	8.54503631591797	70.0889434814453	82
535	1994-06-19	1994	6	19	535	170	Sun	1	N-East	15.70494556427	12.4814767837524	18.922046661377	7.80000066757202	59.8982620239258	66
536	1994-06-20	1994	6	20	536	171	Mon	1	N-East	15.7785758972168	13.5174627304077	18.0290088653564	8.92456436157227	61.9736976623535	74
537	1994-06-21	1994	6	21	537	172	Tue	1	N-East	13.1955184936523	11.1757297515869	15.1995649337769	11.4918117523193	90.0409393310547	74
538	1994-06-22	1994	6	22	538	173	Wed	1	N-East	12.7180223464966	9.39925765991211	16.029182434082	4.3040943145752	51.0204696655273	82
539	1994-06-23	1994	6	23	539	174	Thu	1	N-East	11.7176275253296	6.15882253646851	17.2852115631104	3.5777895450592	51.6462669372559	75
540	1994-06-24	1994	6	24	540	175	Fri	1	N-East	15.0284957885742	10.5747375488281	19.4743099212646	9.54094123840332	66.2533264160156	63
541	1994-06-25	1994	6	25	541	176	Sat	1	N-East	17.6478061676025	12.9642877578735	22.3251037597656	14.5385875701904	71.3591613769531	83
542	1994-06-26	1994	6	26	542	177	Sun	1	N-East	13.3985271453857	9.18692588806152	17.6078414916992	7.14503574371338	59.6889495849609	97
543	1994-06-27	1994	6	27	543	178	Mon	1	N-East	18.2413120269775	13.8574705123901	22.6186504364014	11.0491304397583	56.3456497192383	69
544	1994-06-28	1994	6	28	544	179	Tue	1	N-East	19.5533485412598	12.8822765350342	26.22243309021	11.5736951828003	52.1194496154785	100
545	1994-06-29	1994	6	29	545	180	Wed	1	N-East	16.002555847168	12.9057970046997	19.0876846313477	4.98597764968872	48.3626403808594	68
546	1994-06-30	1994	6	30	546	181	Thu	1	N-East	14.5813436508179	8.51932048797607	20.6518211364746	7.65731859207153	52.2176055908203	64
547	1994-07-01	1994	7	1	547	182	Fri	1	N-East	13.1396684646606	8.76956176757812	17.5036735534668	8.25148487091064	65.6211853027344	74
548	1994-07-02	1994	7	2	548	183	Sat	1	N-East	13.5224733352661	10.9002866744995	16.1823120117188	11.8918113708496	87.7204666137695	78
549	1994-07-03	1994	7	3	549	184	Sun	1	N-East	16.5871734619141	12.5881013870239	20.5959777832031	13.7672472000122	81.5322418212891	93
550	1994-07-04	1994	7	4	550	185	Mon	1	N-East	15.0849056243896	12.8035554885864	17.3787250518799	13.2836236953735	89.9070587158203	74
551	1994-07-05	1994	7	5	551	186	Tue	1	N-East	16.3782978057861	12.6552305221558	20.1032981872559	9.80818843841553	58.7853660583496	62
552	1994-07-06	1994	7	6	552	187	Wed	1	N-East	14.0663938522339	9.31562519073486	18.8169116973877	10.9245643615723	68.5520935058594	68
553	1994-07-07	1994	7	7	553	188	Thu	1	N-East	15.2914934158325	11.935432434082	18.6504669189453	11.4859771728516	72.1960067749023	80
554	1994-07-08	1994	7	8	554	189	Fri	1	N-East	15.3433389663696	11.0329885482788	19.6616744995117	11.8327531814575	71.3626403808594	87
555	1994-07-09	1994	7	9	555	190	Sat	1	N-East	15.5490961074829	10.8809289932251	20.2161350250244	9.24503517150879	57.8310165405273	82
556	1994-07-10	1994	7	10	556	191	Sun	1	N-East	17.2780628204346	13.9772939682007	20.5797309875488	13.3122835159302	70.395393371582	69
557	1994-07-11	1994	7	11	557	192	Mon	1	N-East	18.4792633056641	14.1600351333618	22.7975482940674	14.4344930648804	81.15966796875	61
558	1994-07-12	1994	7	12	558	193	Tue	1	N-East	19.6928062438965	13.8544387817383	25.5257606506348	15.0754356384277	63.9738006591797	77
559	1994-07-13	1994	7	13	559	194	Wed	1	N-East	16.5376110076904	13.1262159347534	19.9391403198242	11.2450351715088	69.7684783935547	74
560	1994-07-14	1994	7	14	560	195	Thu	1	N-East	15.7986354827881	8.45669364929199	23.1488075256348	7.98014402389526	55.1920166015625	72
561	1994-07-15	1994	7	15	561	196	Fri	1	N-East	17.2014923095703	13.9049921035767	20.4830341339111	10.1409425735474	62.8643798828125	78
562	1994-07-16	1994	7	16	562	197	Sat	1	N-East	13.6199541091919	8.43545055389404	18.7357730865479	6.79826021194458	54.2790145874023	72
563	1994-07-17	1994	7	17	563	198	Sun	1	N-East	13.2001857757568	7.89282417297363	18.5139503479004	6.89416599273682	53.7953910827637	62
564	1994-07-18	1994	7	18	564	199	Mon	1	N-East	13.1062183380127	7.95063638687134	18.2700805664062	9.51637649536133	65.1514892578125	68
565	1994-07-19	1994	7	19	565	200	Tue	1	N-East	13.6991806030273	7.10507011413574	20.3036975860596	10.9245643615723	65.5275268554688	71
566	1994-07-20	1994	7	20	566	201	Wed	1	N-East	17.7817459106445	10.925479888916	24.6400356292725	11.9286594390869	53.4089088439941	57
567	1994-07-21	1994	7	21	567	202	Thu	1	N-East	17.9840602874756	14.2739791870117	21.6815986633301	13.3877172470093	70.4398193359375	94
568	1994-07-22	1994	7	22	568	203	Fri	1	N-East	16.1909427642822	11.324535369873	21.0577640533447	8.12865924835205	52.5859794616699	76
569	1994-07-23	1994	7	23	569	204	Sat	1	N-East	15.9932098388672	10.2674503326416	21.7280902862549	9.81463718414307	55.2492370605469	81
570	1994-07-24	1994	7	24	570	205	Sun	1	N-East	17.0937938690186	12.5736532211304	21.6116962432861	14.4327535629272	71.4895629882812	90
571	1994-07-25	1994	7	25	571	206	Mon	1	N-East	17.8400077819824	12.1883821487427	23.4888896942139	14.0040950775146	63.4193496704102	79
572	1994-07-26	1994	7	26	572	207	Tue	1	N-East	19.1591415405273	15.9670419692993	22.3370304107666	14.4795293807983	67.4906845092773	65
573	1994-07-27	1994	7	27	573	208	Wed	1	N-East	16.866626739502	12.8964910507202	20.8337364196777	9.67134094238281	64.2771759033203	69
574	1994-07-28	1994	7	28	574	209	Thu	1	N-East	14.7404899597168	8.00565433502197	21.4817085266113	7.69416618347168	48.7041969299316	74
575	1994-07-29	1994	7	29	575	210	Fri	1	N-East	15.9725856781006	9.21863174438477	22.7311840057373	9.06550598144531	49.6656112670898	87
576	1994-07-30	1994	7	30	576	211	Sat	1	N-East	19.4587669372559	13.555248260498	25.3695373535156	12.3736953735352	55.0773811340332	72
577	1994-07-31	1994	7	31	577	212	Sun	1	N-East	18.5357551574707	14.4847459793091	22.5722579956055	16.7303981781006	81.5503540039062	72
578	1994-08-01	1994	8	1	578	213	Mon	1	N-East	19.158353805542	14.9964170455933	23.3066864013672	12.0655078887939	59.5772743225098	69
579	1994-08-02	1994	8	2	579	214	Tue	1	N-East	17.6350860595703	13.3781881332397	21.8841800689697	11.6696004867554	58.643913269043	78
580	1994-08-03	1994	8	3	580	215	Wed	1	N-East	18.883810043335	14.9291496276855	22.8305053710938	16.93039894104	78.5632629394531	77
581	1994-08-04	1994	8	4	581	216	Thu	1	N-East	20.4800720214844	16.7728824615479	24.1741619110107	14.6777896881104	67.8714447021484	60
582	1994-08-05	1994	8	5	582	217	Fri	1	N-East	18.7938938140869	15.0365133285522	22.5469284057617	12.8286590576172	62.7637672424316	71
583	1994-08-06	1994	8	6	583	218	Sat	1	N-East	13.9665222167969	10.902063369751	17.0276718139648	10.9204702377319	74.0900726318359	76
584	1994-08-07	1994	8	7	584	219	Sun	1	N-East	14.1359577178955	11.836389541626	16.4223880767822	9.34503555297852	68.7702178955078	76
585	1994-08-08	1994	8	8	585	220	Mon	1	N-East	15.1479845046997	12.4110517501831	17.8761177062988	9.3818826675415	66.3298873901367	81
586	1994-08-09	1994	8	9	586	221	Tue	1	N-East	13.6687393188477	11.2767295837402	16.0482540130615	9.74913024902344	72.6012268066406	70
587	1994-08-10	1994	8	10	587	222	Wed	1	N-East	13.4497499465942	11.7150955200195	15.1697101593018	10.4573183059692	79.7561874389648	70
588	1994-08-11	1994	8	11	588	223	Thu	1	N-East	12.8615350723267	11.3873319625854	14.3207216262817	10.2959060668945	84.9081878662109	78
589	1994-08-12	1994	8	12	589	224	Fri	1	N-East	12.9798946380615	9.96999835968018	15.9803295135498	8.39590549468994	70.279541015625	70
590	1994-08-13	1994	8	13	590	225	Sat	1	N-East	11.4918079376221	7.0812554359436	15.9093236923218	3.44094181060791	52.8204689025879	83
591	1994-08-14	1994	8	14	591	226	Sun	1	N-East	11.7407236099243	6.75070142745972	16.741641998291	3.361412525177	49.557933807373	75
592	1994-08-15	1994	8	15	592	227	Mon	1	N-East	13.9278373718262	9.33170032501221	18.5233516693115	5.43510866165161	49.4205741882324	75
593	1994-08-16	1994	8	16	593	228	Tue	1	N-East	13.7326040267944	8.83246421813965	18.6364002227783	9.17369556427002	62.8731842041016	84
594	1994-08-17	1994	8	17	594	229	Wed	1	N-East	13.808479309082	10.0935678482056	17.52321434021	9.46141242980957	71.7971420288086	71
595	1994-08-18	1994	8	18	595	230	Thu	1	N-East	13.9158315658569	9.5308837890625	18.3039646148682	7.08362293243408	57.2526092529297	78
596	1994-08-19	1994	8	19	596	231	Fri	1	N-East	15.3807859420776	11.9702472686768	18.7866516113281	7.32456493377686	53.7269172668457	89
597	1994-08-20	1994	8	20	597	232	Sat	1	N-East	14.1891803741455	10.0236215591431	18.3556213378906	6.89590644836426	55.5198554992676	67
598	1994-08-21	1994	8	21	598	233	Sun	1	N-East	14.8890047073364	9.85938358306885	19.9178714752197	6.34739017486572	51.9164848327637	56
599	1994-08-22	1994	8	22	599	234	Mon	1	N-East	14.0412893295288	8.95997047424316	19.1291618347168	9.92691898345947	63.3147430419922	79
600	1994-08-23	1994	8	23	600	235	Tue	1	N-East	15.3860912322998	12.8833417892456	17.8740215301514	14.7713413238525	91.4947738647461	73
601	1994-08-24	1994	8	24	601	236	Wed	1	N-East	13.4635877609253	9.42595958709717	17.5007247924805	8.722825050354	65.2328567504883	84
602	1994-08-25	1994	8	25	602	237	Thu	1	N-East	14.1398105621338	10.5431127548218	17.7306270599365	8.71463775634766	63.5755424499512	85
603	1994-08-26	1994	8	26	603	238	Fri	1	N-East	14.282919883728	10.8783092498779	17.6800384521484	6.1040940284729	54.215763092041	64
604	1994-08-27	1994	8	27	604	239	Sat	1	N-East	12.8206033706665	9.14330291748047	16.4960308074951	4.39416646957397	50.6421699523926	74
605	1994-08-28	1994	8	28	605	240	Sun	1	N-East	11.6047229766846	7.66278457641602	15.5487203598022	5.95731830596924	58.8497467041016	57
606	1994-08-29	1994	8	29	606	241	Mon	1	N-East	13.869815826416	11.4240159988403	16.3076610565186	8.13275337219238	66.2941665649414	79
607	1994-08-30	1994	8	30	607	242	Tue	1	N-East	13.7931241989136	9.73054599761963	17.8544445037842	7.92047071456909	64.1251831054688	64
608	1994-08-31	1994	8	31	608	243	Wed	1	N-East	11.5857944488525	6.95580625534058	16.2209606170654	11.2409420013428	82.3760528564453	69
609	1994-09-01	1994	9	1	609	244	Thu	1	N-East	13.659065246582	11.9392547607422	15.3678359985352	9.9655065536499	75.107063293457	91
610	1994-09-02	1994	9	2	610	245	Fri	1	N-East	13.646782875061	7.74810934066772	19.5461578369141	6.98188352584839	56.2404365539551	92
611	1994-09-03	1994	9	3	611	246	Sat	1	N-East	12.9260387420654	7.12211418151855	18.7399063110352	10.0655069351196	74.6240539550781	68
612	1994-09-04	1994	9	4	612	247	Sun	1	N-East	14.6740140914917	12.0319318771362	17.3081111907959	8.15731906890869	62.2415542602539	87
613	1994-09-05	1994	9	5	613	248	Mon	1	N-East	12.6566362380981	8.80708122253418	16.5057048797607	4.38597822189331	54.3275337219238	72
614	1994-09-06	1994	9	6	614	249	Tue	1	N-East	10.7649335861206	5.31322479248047	16.2301197052002	7.8409423828125	74.6743087768555	80
615	1994-09-07	1994	9	7	615	250	Wed	1	N-East	11.713698387146	6.20604228973389	17.2277393341064	7.39416646957397	66.3281555175781	72
616	1994-09-08	1994	9	8	616	251	Thu	1	N-East	12.985577583313	8.56896305084229	17.4077415466309	7.76786136627197	66.2001037597656	74
617	1994-09-09	1994	9	9	617	252	Fri	1	N-East	10.9359350204468	5.68476057052612	16.1989326477051	6.39416646957397	61.1059341430664	46
618	1994-09-10	1994	9	10	618	253	Sat	1	N-East	11.8494873046875	7.70609998703003	15.9938125610352	5.52865934371948	59.3883323669434	66
619	1994-09-11	1994	9	11	619	254	Sun	1	N-East	12.5894508361816	9.8712682723999	15.3028602600098	7.64503622055054	66.8473892211914	79
620	1994-09-12	1994	9	12	620	255	Mon	1	N-East	10.5123929977417	8.64432907104492	12.3802328109741	9.93684673309326	89.8105392456055	74
621	1994-09-13	1994	9	13	621	256	Tue	1	N-East	11.4825162887573	9.5299711227417	13.4256820678711	9.42047023773193	82.6801452636719	80
622	1994-09-14	1994	9	14	622	257	Wed	1	N-East	11.1478691101074	9.30627632141113	12.9832677841187	6.60818815231323	72.7426834106445	73
623	1994-09-15	1994	9	15	623	258	Thu	1	N-East	10.9325141906738	9.31208896636963	12.5436811447144	9.68362331390381	90.0952911376953	72
624	1994-09-16	1994	9	16	624	259	Fri	1	N-East	9.63494682312012	7.1221809387207	12.1432399749756	0.402354419231415	50.7035865783691	65
625	1994-09-17	1994	9	17	625	260	Sat	1	N-East	9.66835117340088	7.00296783447266	12.3280696868896	2.89416599273682	57.842170715332	82
626	1994-09-18	1994	9	18	626	261	Sun	1	N-East	11.0766105651855	8.3690071105957	13.7805366516113	2.39826011657715	52.7609024047852	84
627	1994-09-19	1994	9	19	627	262	Mon	1	N-East	10.5502166748047	8.53582763671875	12.5579471588135	8.13275337219238	80.6702117919922	77
628	1994-09-20	1994	9	20	628	263	Tue	1	N-East	11.2190170288086	9.6204948425293	12.8053884506226	10.4245653152466	93.4678726196289	75
629	1994-09-21	1994	9	21	629	264	Wed	1	N-East	12.1001195907593	9.98602294921875	14.2037839889526	10.9122819900513	90.8573226928711	65
630	1994-09-22	1994	9	22	630	265	Thu	1	N-East	12.2800741195679	6.16215419769287	18.4094104766846	8.18188381195068	66.5942687988281	85
631	1994-09-23	1994	9	23	631	266	Fri	1	N-East	11.516040802002	5.10983657836914	17.9306507110596	5.40061473846436	64.7632522583008	82
632	1994-09-24	1994	9	24	632	267	Sat	1	N-East	9.39779663085938	6.3739595413208	12.42360496521	8.03684711456299	81.6081848144531	91
633	1994-09-25	1994	9	25	633	268	Sun	1	N-East	10.0308675765991	8.5521068572998	11.5008068084717	6.83858728408813	78.0151519775391	70
634	1994-09-26	1994	9	26	634	269	Mon	1	N-East	11.141640663147	7.53290605545044	14.750096321106	6.60818815231323	65.1245651245117	75
635	1994-09-27	1994	9	27	635	270	Tue	1	N-East	11.4328927993774	7.99516105651855	14.8675384521484	6.19999980926514	66.6081848144531	64
636	1994-09-28	1994	9	28	636	271	Wed	1	N-East	9.61258697509766	4.18114948272705	15.0568466186523	9.13275337219238	73.311164855957	65
637	1994-09-29	1994	9	29	637	272	Thu	1	N-East	13.8093729019165	11.9861755371094	15.6176061630249	8.83684730529785	70.1064453125	84
638	1994-09-30	1994	9	30	638	273	Fri	1	N-East	14.0995264053345	11.1325044631958	17.0539093017578	9.82865905761719	74.1655044555664	99
639	1994-10-01	1994	10	1	639	274	Sat	1	N-East	11.2519912719727	8.30590629577637	14.1911554336548	8.37543487548828	86.6222076416016	79
640	1994-10-02	1994	10	2	640	275	Sun	1	N-East	12.2670068740845	9.67206478118896	14.855450630188	10.3754348754883	84.5127944946289	84
641	1994-10-03	1994	10	3	641	276	Mon	1	N-East	6.24044561386108	3.22114610671997	9.26032161712646	0.679529130458832	71.7607955932617	85
642	1994-10-04	1994	10	4	642	277	Tue	1	N-East	4.96456718444824	0.124831773340702	9.81870555877686	-0.226304829120636	65.5210876464844	91
643	1994-10-05	1994	10	5	643	278	Wed	1	N-East	8.82496070861816	4.425133228302	13.2345294952393	4.33684778213501	66.6941680908203	68
644	1994-10-06	1994	10	6	644	279	Thu	1	N-East	11.5791893005371	8.57971572875977	14.5737752914429	5.24094152450562	60.466121673584	83
645	1994-10-07	1994	10	7	645	280	Fri	1	N-East	12.9376182556152	11.0332889556885	14.8302688598633	9.0368480682373	72.3824996948242	81
646	1994-10-08	1994	10	8	646	281	Sat	1	N-East	11.2527723312378	7.81104946136475	14.6882886886597	5.44329690933228	65.3994903564453	84
647	1994-10-09	1994	10	9	647	282	Sun	1	N-East	9.17544555664062	3.687908411026	14.6668071746826	3.96786141395569	65.7369537353516	82
648	1994-10-10	1994	10	10	648	283	Mon	1	N-East	9.8043851852417	3.81205153465271	15.8115949630737	7.36550664901733	77.7152481079102	79
649	1994-10-11	1994	10	11	649	284	Tue	1	N-East	10.1632833480835	2.25061273574829	18.0961589813232	2.46786141395569	50.9591636657715	85
650	1994-10-12	1994	10	12	650	285	Wed	1	N-East	10.8566045761108	6.46334171295166	15.2561769485474	8.90818786621094	80.3947830200195	77
651	1994-10-13	1994	10	13	651	286	Thu	1	N-East	7.67135524749756	2.68514585494995	12.6729612350464	6.47369527816772	82.3748168945312	80
652	1994-10-14	1994	10	14	652	287	Fri	1	N-East	10.5001382827759	3.01084399223328	18.0009117126465	5.93101358413696	61.7440147399902	67
653	1994-10-15	1994	10	15	653	288	Sat	1	N-East	9.59597301483154	6.87638854980469	12.3116960525513	9.13275337219238	89.4713363647461	80
654	1994-10-16	1994	10	16	654	289	Sun	1	N-East	7.52349758148193	6.12719345092773	8.91046237945557	1.13684749603271	60.5620307922363	72
655	1994-10-17	1994	10	17	655	290	Mon	1	N-East	6.46484136581421	3.36740851402283	9.56476974487305	1.4532243013382	62.5626411437988	79
656	1994-10-18	1994	10	18	656	291	Tue	1	N-East	8.25278282165527	6.06156206130981	10.4466323852539	1.93275344371796	60.1088027954102	79
657	1994-10-19	1994	10	19	657	292	Wed	1	N-East	8.88778781890869	6.35836982727051	11.4129676818848	7.70409440994263	82.1696014404297	76
658	1994-10-20	1994	10	20	658	293	Thu	1	N-East	10.4790678024292	8.94616413116455	11.9990320205688	8.91228199005127	86.8842315673828	75
659	1994-10-21	1994	10	21	659	294	Fri	1	N-East	10.1936683654785	7.68881702423096	12.6903209686279	9.44913005828857	86.3889465332031	86
660	1994-10-22	1994	10	22	660	295	Sat	1	N-East	11.601110458374	9.96124076843262	13.2288665771484	11.5754346847534	94.2047119140625	80
661	1994-10-23	1994	10	23	661	296	Sun	1	N-East	10.6855392456055	8.31417083740234	13.0489912033081	8.12865924835205	79.7573089599609	91
662	1994-10-24	1994	10	24	662	297	Mon	1	N-East	9.3341121673584	6.99047422409058	11.6719856262207	2.07369518280029	56.8281478881836	74
663	1994-10-25	1994	10	25	663	298	Tue	1	N-East	9.20102214813232	6.12005090713501	12.2808847427368	4.12865924835205	68.6456527709961	96
664	1994-10-26	1994	10	26	664	299	Wed	1	N-East	8.39894199371338	5.1744818687439	11.6259107589722	4.81637668609619	72.7842330932617	81
665	1994-10-27	1994	10	27	665	300	Thu	1	N-East	7.58085298538208	3.75571370124817	11.4091157913208	3.32047080993652	69.1818771362305	81
666	1994-10-28	1994	10	28	666	301	Fri	1	N-East	8.34222412109375	5.50406694412231	11.1811990737915	4.19181156158447	72.5795288085938	67
667	1994-10-29	1994	10	29	667	302	Sat	1	N-East	5.50714445114136	2.20715498924255	8.81421089172363	4.1040940284729	84.6146469116211	81
668	1994-10-30	1994	10	30	668	303	Sun	1	N-East	8.91946029663086	5.36275053024292	12.476619720459	7.99590539932251	84.4760513305664	87
669	1994-10-31	1994	10	31	669	304	Mon	1	N-East	10.3901386260986	7.42373943328857	13.3511238098145	8.62630462646484	79.2707290649414	91
670	1994-11-01	1994	11	1	670	305	Tue	1	N-East	8.90526103973389	6.72537183761597	11.113597869873	4.39764547348022	70.7636642456055	73
671	1994-11-02	1994	11	2	671	306	Wed	1	N-East	5.30222940444946	1.30207014083862	9.30687618255615	2.95731854438782	76.1398162841797	88
672	1994-11-03	1994	11	3	672	307	Thu	1	N-East	9.17645168304443	5.7004919052124	12.654016494751	9.8040943145752	93.4023590087891	69
673	1994-11-04	1994	11	4	673	308	Fri	1	N-East	11.0030784606934	9.18781661987305	12.8112363815308	10.3999996185303	87.5930404663086	65
674	1994-11-05	1994	11	5	674	309	Sat	1	N-East	9.82006645202637	8.64633464813232	10.9893550872803	10.3999996185303	96.3023529052734	90
675	1994-11-06	1994	11	6	675	310	Sun	1	N-East	9.07970142364502	6.1633768081665	11.9955272674561	5.23684787750244	72.0398101806641	78
676	1994-11-07	1994	11	7	676	311	Mon	1	N-East	6.83181047439575	3.94300365447998	9.72286605834961	6.44094181060791	90.651481628418	77
677	1994-11-08	1994	11	8	677	312	Tue	1	N-East	8.94274234771729	6.48927974700928	11.3944787979126	8.82047080993652	89.537467956543	79
678	1994-11-09	1994	11	9	678	313	Wed	1	N-East	10.2024631500244	9.08368301391602	11.3109073638916	10.2918119430542	95.2777862548828	78
679	1994-11-10	1994	11	10	679	314	Thu	1	N-East	9.40454769134521	8.92688941955566	9.87009525299072	8.95905780792236	95.1256866455078	88
680	1994-11-11	1994	11	11	680	315	Fri	1	N-East	8.74357509613037	7.95516157150269	9.52072334289551	8.28362274169922	93.5	83
681	1994-11-12	1994	11	12	681	316	Sat	1	N-East	9.01706981658936	8.31140518188477	9.71238994598389	8.42047023773193	92.9655075073242	78
682	1994-11-13	1994	11	13	682	317	Sun	1	N-East	11.5425233840942	8.26320838928223	14.8202753067017	9.34503555297852	82.8643798828125	69
683	1994-11-14	1994	11	14	683	318	Mon	1	N-East	11.9042158126831	9.45181941986084	14.3509073257446	5.38597774505615	59.0714492797852	80
684	1994-11-15	1994	11	15	684	319	Tue	1	N-East	9.97972106933594	8.48129749298096	11.4699182510376	4.81228303909302	67.8947830200195	92
685	1994-11-16	1994	11	16	685	320	Wed	1	N-East	8.77770519256592	6.78756809234619	10.7622213363647	3.41637682914734	68.4865875244141	75
686	1994-11-17	1994	11	17	686	321	Thu	1	N-East	7.22795581817627	5.25386571884155	9.19670391082764	4.04677581787109	78.7707290649414	92
687	1994-11-18	1994	11	18	687	322	Fri	1	N-East	9.03730201721191	6.16624546051025	11.9054946899414	5.76315212249756	87.4870986938477	78
688	1994-11-19	1994	11	19	688	323	Sat	1	N-East	10.4523229598999	6.50592374801636	14.3985071182251	9.89999961853027	76.607063293457	76
689	1994-11-20	1994	11	20	689	324	Sun	1	N-East	9.88812065124512	8.07087898254395	11.6981782913208	6.19999980926514	76.0818786621094	90
690	1994-11-21	1994	11	21	690	325	Mon	1	N-East	7.51128482818604	3.79928684234619	11.2225866317749	3.95322442054749	73.9527130126953	89
691	1994-11-22	1994	11	22	691	326	Tue	1	N-East	9.25847053527832	4.37009525299072	14.1518478393555	7.512282371521	80.9456481933594	74
692	1994-11-23	1994	11	23	692	327	Wed	1	N-East	11.0901021957397	7.70813179016113	14.4675064086914	9.03275299072266	70.5193405151367	96
693	1994-11-24	1994	11	24	693	328	Thu	1	N-East	7.79892063140869	5.00066900253296	10.5956802368164	4.66724634170532	79.3379669189453	73
694	1994-11-25	1994	11	25	694	329	Fri	1	N-East	8.17709541320801	3.0486307144165	13.3122634887695	7.04912996292114	79.7947845458984	95
695	1994-11-26	1994	11	26	695	330	Sat	1	N-East	11.8658905029297	9.82807159423828	13.900598526001	10.7631530761719	89.015754699707	78
696	1994-11-27	1994	11	27	696	331	Sun	1	N-East	8.29472160339355	5.03915500640869	11.5428895950317	6.20409440994263	74.0204772949219	85
697	1994-11-28	1994	11	28	697	332	Mon	1	N-East	7.00699472427368	3.26676464080811	10.7468013763428	4.62456512451172	74.7777862548828	84
698	1994-11-29	1994	11	29	698	333	Tue	1	N-East	3.50367403030396	-0.135524705052376	7.14086103439331	1.54094183444977	92.0783996582031	88
699	1994-11-30	1994	11	30	699	334	Wed	1	N-East	3.81322121620178	1.60591578483582	6.01683759689331	3.03275370597839	79.9947814941406	100
700	1994-12-01	1994	12	1	700	335	Thu	1	N-East	5.25813913345337	3.78483700752258	6.72468709945679	5.35905838012695	95.6426773071289	89
701	1994-12-02	1994	12	2	701	336	Fri	1	N-East	6.60083627700806	4.7814507484436	8.42850399017334	5.30000066757202	94.6713485717773	86
702	1994-12-03	1994	12	3	702	337	Sat	1	N-East	7.84244775772095	4.56891775131226	11.1178579330444	6.24094152450562	74.288948059082	81
703	1994-12-04	1994	12	4	703	338	Sun	1	N-East	5.8693413734436	4.30211496353149	7.42994213104248	4.2918119430542	90.1760482788086	90
704	1994-12-05	1994	12	5	704	339	Mon	1	N-East	4.76078605651855	2.74774932861328	6.76752042770386	2.47952914237976	85.8058319091797	79
705	1994-12-06	1994	12	6	705	340	Tue	1	N-East	5.91670560836792	3.79397583007812	8.03297710418701	0.424565076828003	65.524055480957	70
706	1994-12-07	1994	12	7	706	341	Wed	1	N-East	6.03407096862793	3.56335043907166	8.50068473815918	1.81637668609619	75.1292724609375	80
707	1994-12-08	1994	12	8	707	342	Thu	1	N-East	5.78481864929199	2.92259168624878	8.64289855957031	1.08771753311157	66.7514801025391	90
708	1994-12-09	1994	12	9	708	343	Fri	1	N-East	6.32246065139771	3.20951557159424	9.43200302124023	1.74094176292419	70.0432968139648	88
709	1994-12-10	1994	12	10	709	344	Sat	1	N-East	10.6260032653809	5.86657619476318	15.3901710510254	9.11228275299072	75.2602920532227	75
710	1994-12-11	1994	12	11	710	345	Sun	1	N-East	12.2299833297729	9.71773624420166	14.7395458221436	10.3122825622559	74.0596771240234	92
711	1994-12-12	1994	12	12	711	346	Mon	1	N-East	11.9287986755371	10.2643461227417	13.582480430603	5.56724643707275	68.0754318237305	89
712	1994-12-13	1994	12	13	712	347	Tue	1	N-East	6.33522701263428	4.24783515930176	8.41395664215088	3.57134079933167	82.4263076782227	76
713	1994-12-14	1994	12	14	713	348	Wed	1	N-East	2.08466029167175	0.211654812097549	3.94968843460083	-1.23449325561523	75.9029693603516	87
714	1994-12-15	1994	12	15	714	349	Thu	1	N-East	2.96696662902832	-1.75375521183014	7.69069385528564	0.391811639070511	81.6029663085938	87
715	1994-12-16	1994	12	16	715	350	Fri	1	N-East	4.83751535415649	1.31897866725922	8.35686206817627	0.859058201313019	76.4263076782227	92
716	1994-12-17	1994	12	17	716	351	Sat	1	N-East	7.05126857757568	2.29191994667053	11.8147439956665	6.0918116569519	78.9491348266602	100
717	1994-12-18	1994	12	18	717	352	Sun	1	N-East	5.03731870651245	2.95804262161255	7.10929822921753	0.316376715898514	70.4257888793945	81
718	1994-12-19	1994	12	19	718	353	Mon	1	N-East	3.58318066596985	1.68301832675934	5.47327852249146	-0.579529166221619	69.6561965942383	86
719	1994-12-20	1994	12	20	719	354	Tue	1	N-East	3.63658738136292	1.69036591053009	5.57386350631714	0.646775662899017	78.1976470947266	94
720	1994-12-21	1994	12	21	720	355	Wed	1	N-East	1.52854633331299	-0.955670833587646	4.00464344024658	-1.25905823707581	78.7310180664062	85
721	1994-12-22	1994	12	22	721	356	Thu	1	N-East	0.781191885471344	-2.21574807167053	3.77344489097595	-2.67134094238281	78.6678619384766	93
722	1994-12-23	1994	12	23	722	357	Fri	1	N-East	2.64356851577759	-1.03712725639343	6.3242974281311	-0.134493187069893	77.9251708984375	94
723	1994-12-24	1994	12	24	723	358	Sat	1	N-East	5.09567594528198	1.77362740039825	8.41402053833008	4.75322437286377	80.6251831054688	86
724	1994-12-25	1994	12	25	724	359	Sun	1	N-East	6.68609571456909	3.90228247642517	9.46358203887939	3.80000019073486	75.6234436035156	102
725	1994-12-26	1994	12	26	725	360	Mon	1	N-East	4.41020011901855	2.06515192985535	6.74643850326538	0.940941751003265	78.3087997436523	106
726	1994-12-27	1994	12	27	726	361	Tue	1	N-East	4.23153114318848	1.91093492507935	6.54635572433472	1.22221076488495	85.0754318237305	114
727	1994-12-28	1994	12	28	727	362	Wed	1	N-East	7.30581474304199	1.37043356895447	13.2494068145752	7.89181184768677	86.5094146728516	114
728	1994-12-29	1994	12	29	728	363	Thu	1	N-East	8.08903121948242	5.6588568687439	10.5145606994629	2.31228256225586	68.8708343505859	98
729	1994-12-30	1994	12	30	729	364	Fri	1	N-East	6.24450874328613	4.80752182006836	7.67241907119751	1.26550686359406	64.9913024902344	93
730	1994-12-31	1994	12	31	730	365	Sat	1	N-East	2.20927786827087	0.272974252700806	4.13560914993286	-2.61228251457214	70.6338806152344	99
731	1995-01-01	1995	1	1	731	1	Sun	1	N-East	-0.715056538581848	-1.88356423377991	0.438990414142609	-6.51811647415161	63.0649948120117	101
732	1995-01-02	1995	1	2	732	2	Mon	1	N-East	0.151681467890739	-2.16777682304382	2.46115350723267	-4.56724691390991	66.5368499755859	72
733	1995-01-03	1995	1	3	733	3	Tue	1	N-East	-1.34694683551788	-4.81785535812378	2.12059807777405	-3.33039879798889	81.5777893066406	89
734	1995-01-04	1995	1	4	734	4	Wed	1	N-East	0.398382037878036	-2.38940167427063	3.18043351173401	-0.391811639070511	87.8736953735352	82
735	1995-01-05	1995	1	5	735	5	Thu	1	N-East	3.67411875724792	1.28869152069092	6.05435419082642	3.30409407615662	90.6023559570312	103
736	1995-01-06	1995	1	6	736	6	Fri	1	N-East	4.81904649734497	3.04087471961975	6.58935260772705	1.35086989402771	76.4724731445312	110
737	1995-01-07	1995	1	7	737	7	Sat	1	N-East	5.76251554489136	0.690275609493256	10.8389387130737	4.83275365829468	81.7398147583008	91
738	1995-01-08	1995	1	8	738	8	Sun	1	N-East	6.76567363739014	4.15603685379028	9.37160682678223	1.28362333774567	72.1877212524414	112
739	1995-01-09	1995	1	9	739	9	Mon	1	N-East	7.42574596405029	4.88588285446167	9.96308517456055	4.67543506622314	74.0017395019531	88
740	1995-01-10	1995	1	10	740	10	Tue	1	N-East	4.27924060821533	2.70417523384094	5.84401702880859	1.5467756986618	80.6567077636719	79
741	1995-01-11	1995	1	11	741	11	Wed	1	N-East	1.43366646766663	-0.390304893255234	3.24655485153198	-4.37134122848511	64.2859725952148	82
742	1995-01-12	1995	1	12	742	12	Thu	1	N-East	2.65500259399414	0.52555787563324	4.77593517303467	-3.45905828475952	66.6941680908203	89
743	1995-01-13	1995	1	13	743	13	Fri	1	N-East	5.51061010360718	1.82010364532471	9.20212459564209	5.77134084701538	85.7040939331055	82
744	1995-01-14	1995	1	14	744	14	Sat	1	N-East	7.72543096542358	5.04103899002075	10.406156539917	5.78362321853638	75.5310134887695	96
745	1995-01-15	1995	1	15	745	15	Sun	1	N-East	4.58583402633667	-0.456419676542282	9.63540077209473	2.17952919006348	84.5648956298828	91
746	1995-01-16	1995	1	16	746	16	Mon	1	N-East	6.07801532745361	1.45950543880463	10.7018909454346	3.70818829536438	63.5146408081055	85
747	1995-01-17	1995	1	17	747	17	Tue	1	N-East	4.26674509048462	0.196665450930595	8.33825778961182	2.70409440994263	89.0146408081055	91
748	1995-01-18	1995	1	18	748	18	Wed	1	N-East	3.4947657585144	1.07511019706726	5.91123819351196	-0.308188378810883	70.500617980957	100
749	1995-01-19	1995	1	19	749	19	Thu	1	N-East	2.7711067199707	0.150586068630219	5.38694190979004	0.424565076828003	83.9736938476562	90
750	1995-01-20	1995	1	20	750	20	Fri	1	N-East	3.13981080055237	1.46166956424713	4.8125581741333	0.495905816555023	79.1351089477539	92
751	1995-01-21	1995	1	21	751	21	Sat	1	N-East	2.80047249794006	0.564275681972504	5.03072929382324	1.6204708814621	88.8409423828125	93
752	1995-01-22	1995	1	22	752	22	Sun	1	N-East	3.16843271255493	1.17898416519165	5.1501841545105	-3.31402230262756	59.019962310791	105
753	1995-01-23	1995	1	23	753	23	Mon	1	N-East	4.06674528121948	1.81317901611328	6.31392765045166	1.15905833244324	73.2590637207031	88
754	1995-01-24	1995	1	24	754	24	Tue	1	N-East	4.67449045181274	3.42460870742798	5.91574716567993	-0.317489892244339	66.3223342895508	94
755	1995-01-25	1995	1	25	755	25	Wed	1	N-East	1.57487714290619	-0.201342761516571	3.34314441680908	0.291811674833298	86.5064544677734	89
756	1995-01-26	1995	1	26	756	26	Thu	1	N-East	1.58976900577545	-0.323924154043198	3.49479818344116	-2.28188371658325	69.6964111328125	84
757	1995-01-27	1995	1	27	757	27	Fri	1	N-East	0.921991407871246	-1.9989777803421	3.84187197685242	-1.10644853115082	88.5104446411133	103
758	1995-01-28	1995	1	28	758	28	Sat	1	N-East	2.92169260978699	-0.76461398601532	6.60933351516724	3.28362321853638	79.2357330322266	83
759	1995-01-29	1995	1	29	759	29	Sun	1	N-East	3.8471531867981	2.23130130767822	5.45334482192993	1.51228260993958	81.5088043212891	102
760	1995-01-30	1995	1	30	760	30	Mon	1	N-East	2.52836990356445	-1.78821265697479	6.84862184524536	-0.206448584794998	89.9964141845703	109
761	1995-01-31	1995	1	31	761	31	Tue	1	N-East	3.48753356933594	0.24667389690876	6.7353458404541	9.50992870330811	92.0912017822266	98
762	1995-02-01	1995	2	1	762	32	Wed	1	N-East	6.71679258346558	4.80645942687988	8.61771011352539	2.09590578079224	67.4555816650391	106
763	1995-02-02	1995	2	2	763	33	Thu	1	N-East	4.24182891845703	0.389188259840012	8.09646129608154	-0.920470833778381	68.4432983398438	83
764	1995-02-03	1995	2	3	764	34	Fri	1	N-East	7.31420850753784	3.39390468597412	11.2362384796143	4.62865924835205	68.2135162353516	84
765	1995-02-04	1995	2	4	765	35	Sat	1	N-East	8.31571102142334	6.76510715484619	9.85905838012695	4.07308053970337	73.975944519043	90
766	1995-02-05	1995	2	5	766	36	Sun	1	N-East	8.57837200164795	5.74302816390991	11.4116306304932	5.80409383773804	79.7760467529297	104
767	1995-02-06	1995	2	6	767	37	Mon	1	N-East	9.98083782196045	8.35732841491699	11.5965518951416	5.01637649536133	67.5965194702148	91
768	1995-02-07	1995	2	7	768	38	Tue	1	N-East	6.51690530776978	4.32821989059448	8.69885444641113	2.5771746635437	81.9343872070312	96
769	1995-02-08	1995	2	8	769	39	Wed	1	N-East	1.7725293636322	0.0825186148285866	3.45421457290649	-4.08362293243408	65.0818786621094	74
770	1995-02-09	1995	2	9	770	40	Thu	1	N-East	0.667474031448364	-1.25671076774597	2.58714866638184	-3.15322422981262	74.7140197753906	97
771	1995-02-10	1995	2	10	771	41	Fri	1	N-East	2.28103041648865	0.597056925296783	3.95888018608093	1.80409419536591	89.6877212524414	97
772	1995-02-11	1995	2	11	772	42	Sat	1	N-East	6.03971862792969	2.66862845420837	9.40938282012939	4.69999980926514	92.3965148925781	79
773	1995-02-12	1995	2	12	773	43	Sun	1	N-East	7.25891065597534	4.26252841949463	10.252462387085	2.36141276359558	63.4135093688965	91
774	1995-02-13	1995	2	13	774	44	Mon	1	N-East	7.44967603683472	5.65378713607788	9.23545169830322	5.87952899932861	87.3456497192383	103
775	1995-02-14	1995	2	14	775	45	Tue	1	N-East	6.66495943069458	3.78806042671204	9.51704788208008	1.50409424304962	67.0678558349609	98
776	1995-02-15	1995	2	15	776	46	Wed	1	N-East	6.18665504455566	3.65530800819397	8.71469974517822	-0.159058228135109	58.3152542114258	95
777	1995-02-16	1995	2	16	777	47	Thu	1	N-East	6.04451656341553	3.61257934570312	8.47724342346191	0.445035934448242	63.5398178100586	86
778	1995-02-17	1995	2	17	778	48	Fri	1	N-East	5.40967607498169	3.46997284889221	7.34812211990356	-0.175434947013855	66.1801452636719	89
779	1995-02-18	1995	2	18	779	49	Sat	1	N-East	5.15084552764893	2.00042414665222	8.30611896514893	1.22630488872528	72.1970291137695	80
780	1995-02-19	1995	2	19	780	50	Sun	1	N-East	6.48235750198364	4.06707620620728	8.89720916748047	-1.75496399402618	52.3988723754883	78
781	1995-02-20	1995	2	20	781	51	Mon	1	N-East	5.7113823890686	3.05316042900085	8.349609375	1.00409424304962	72.5702209472656	81
782	1995-02-21	1995	2	21	782	52	Tue	1	N-East	4.41759014129639	1.7697229385376	7.06109857559204	-1.86315250396729	62.4965171813965	99
783	1995-02-22	1995	2	22	783	53	Wed	1	N-East	5.14279651641846	2.9441545009613	7.33569097518921	2.91637682914734	81.7111587524414	85
784	1995-02-23	1995	2	23	784	54	Thu	1	N-East	4.49828624725342	2.00989699363708	6.9820818901062	0.283623307943344	67.8853607177734	94
785	1995-02-24	1995	2	24	785	55	Fri	1	N-East	3.4880473613739	-0.316380262374878	7.2915415763855	0.291811674833298	80.0093154907227	90
786	1995-02-25	1995	2	25	786	56	Sat	1	N-East	3.92645382881165	0.944177389144897	6.90480947494507	-2.26315236091614	63.845645904541	96
787	1995-02-26	1995	2	26	787	57	Sun	1	N-East	3.12825965881348	-0.963343441486359	7.22294855117798	-5.08771705627441	55.3959045410156	89
788	1995-02-27	1995	2	27	788	58	Mon	1	N-East	6.87526512145996	1.77660632133484	11.9805030822754	4.43684768676758	75.6947784423828	75
789	1995-02-28	1995	2	28	789	59	Tue	1	N-East	9.30387306213379	6.39832639694214	12.2089214324951	5.45087003707886	69.0771713256836	92
790	1995-03-01	1995	3	1	790	60	Wed	1	N-East	4.41353416442871	0.863770544528961	7.96304130554199	0.291811674833298	81.9344940185547	86
791	1995-03-02	1995	3	2	791	61	Thu	1	N-East	1.72369873523712	-0.868989586830139	4.31085109710693	-3.2713406085968	66.2538375854492	75
792	1995-03-03	1995	3	3	792	62	Fri	1	N-East	1.57250738143921	-1.8579910993576	5.00323152542114	-3.64268159866333	67.8012313842773	80
793	1995-03-04	1995	3	4	793	63	Sat	1	N-East	0.915172874927521	-2.87925171852112	4.71106290817261	-4.01637697219849	65.3222122192383	84
794	1995-03-05	1995	3	5	794	64	Sun	1	N-East	3.05394172668457	-0.0910285040736198	6.19609260559082	0.404094189405441	74.8000030517578	98
795	1995-03-06	1995	3	6	795	65	Mon	1	N-East	3.4423451423645	0.640371978282928	6.24027729034424	-4.10644865036011	56.8660202026367	99
796	1995-03-07	1995	3	7	796	66	Tue	1	N-East	2.220134973526	-0.444772481918335	4.88084363937378	0.081268884241581	86.9262008666992	81
797	1995-03-08	1995	3	8	797	67	Wed	1	N-East	0.924649894237518	-2.21939039230347	4.06699132919312	-1.58362329006195	78.2327499389648	99
798	1995-03-09	1995	3	9	798	68	Thu	1	N-East	4.32056188583374	0.394674152135849	8.24803447723389	-1.45086991786957	59.5965232849121	101
799	1995-03-10	1995	3	10	799	69	Fri	1	N-East	7.63483238220215	4.38678598403931	10.8807592391968	1.35322427749634	58.8287620544434	96
800	1995-03-11	1995	3	11	800	70	Sat	1	N-East	6.80697536468506	5.28261423110962	8.32487678527832	5.80000019073486	89.2286529541016	104
801	1995-03-12	1995	3	12	801	71	Sun	1	N-East	5.72251892089844	-0.0341319255530834	11.4878826141357	0.249130129814148	61.9368515014648	88
802	1995-03-13	1995	3	13	802	72	Mon	1	N-East	8.6915979385376	4.08571577072144	13.2991161346436	4.83684778213501	70.9404373168945	96
803	1995-03-14	1995	3	14	803	73	Tue	1	N-East	6.65319633483887	4.64738368988037	8.65076160430908	3.22630476951599	73.5403213500977	81
804	1995-03-15	1995	3	15	804	74	Wed	1	N-East	3.4793062210083	1.04315710067749	5.9096884727478	-3.36315250396729	59.3088035583496	87
805	1995-03-16	1995	3	16	805	75	Thu	1	N-East	4.27189207077026	1.15134739875793	7.39016246795654	-0.595905840396881	62.6965179443359	97
806	1995-03-17	1995	3	17	806	76	Fri	1	N-East	4.801926612854	2.71354413032532	6.88425922393799	-0.538587391376495	71.1345901489258	90
807	1995-03-18	1995	3	18	807	77	Sat	1	N-East	4.95697355270386	1.65094232559204	8.26167011260986	-1.5467756986618	57.053840637207	103
808	1995-03-19	1995	3	19	808	78	Sun	1	N-East	3.4219753742218	-0.182001039385796	7.02553272247314	-2.67778944969177	59.0619239807129	83
809	1995-03-20	1995	3	20	809	79	Mon	1	N-East	3.9446849822998	0.400710016489029	7.48785781860352	-5.97543478012085	46.4450340270996	88
810	1995-03-21	1995	3	21	810	80	Tue	1	N-East	4.07122373580933	-0.307269752025604	8.45325756072998	-3.77952933311462	52.1696014404297	96
811	1995-03-22	1995	3	22	811	81	Wed	1	N-East	6.4090313911438	2.05197882652283	10.7686862945557	0.157318457961082	55.0152549743652	92
812	1995-03-23	1995	3	23	812	82	Thu	1	N-East	9.7262601852417	5.86862850189209	13.583062171936	-1.5771746635437	44.4035835266113	73
813	1995-03-24	1995	3	24	813	83	Fri	1	N-East	7.76933002471924	4.56961059570312	10.9668264389038	2.34503602981567	62.9684753417969	89
814	1995-03-25	1995	3	25	814	84	Sat	1	N-East	6.08948612213135	2.86593914031982	9.31226825714111	-1.76550674438477	56.5765571594238	86
815	1995-03-26	1995	3	26	815	85	Sun	1	N-East	6.71254110336304	2.60920095443726	10.8152894973755	5.24677610397339	80.2748184204102	67
816	1995-03-27	1995	3	27	816	86	Mon	1	N-East	1.68528318405151	-1.18458664417267	4.55127573013306	-4.90174007415771	59.0468826293945	76
817	1995-03-28	1995	3	28	817	87	Tue	1	N-East	0.835924685001373	-0.66576737165451	2.32864928245544	-0.195905819535255	89.226921081543	98
818	1995-03-29	1995	3	29	818	88	Wed	1	N-East	2.31474256515503	-2.41088175773621	7.04465770721436	-3.28771734237671	61.9163780212402	77
819	1995-03-30	1995	3	30	819	89	Thu	1	N-East	5.51168251037598	0.411555171012878	10.6182899475098	3.66550660133362	76.2094268798828	76
820	1995-03-31	1995	3	31	820	90	Fri	1	N-East	10.3558483123779	7.03699207305908	13.6771125793457	7.37952899932861	72.1508636474609	99
821	1995-04-01	1995	4	1	821	91	Sat	1	N-East	12.4045372009277	9.84930992126465	14.9563064575195	8.16315174102783	69.2058334350586	81
822	1995-04-02	1995	4	2	822	92	Sun	1	N-East	12.2092876434326	9.07541656494141	15.3414344787598	2.93510770797729	46.8697052001953	78
823	1995-04-03	1995	4	3	823	93	Mon	1	N-East	10.0399780273438	7.64406442642212	12.4315214157104	5.86550664901733	70.4176025390625	85
824	1995-04-04	1995	4	4	824	94	Tue	1	N-East	5.89535665512085	2.13834595680237	9.65282821655273	-1.61228263378143	59.3409423828125	99
825	1995-04-05	1995	4	5	825	95	Wed	1	N-East	9.80402565002441	6.91634607315063	12.6910333633423	6.22047090530396	72.2169952392578	75
826	1995-04-06	1995	4	6	826	96	Thu	1	N-East	11.5550851821899	7.45032930374146	15.6648483276367	5.02865886688232	61.7257919311523	86
827	1995-04-07	1995	4	7	827	97	Fri	1	N-East	11.3547029495239	7.81978273391724	14.8856449127197	3.01228284835815	63.0859756469727	85
828	1995-04-08	1995	4	8	828	98	Sat	1	N-East	5.03592729568481	1.08657419681549	8.98873710632324	-3.34268140792847	51.1473922729492	78
829	1995-04-09	1995	4	9	829	99	Sun	1	N-East	6.43137168884277	0.585833847522736	12.2863292694092	2.04913020133972	63.9730758666992	78
830	1995-04-10	1995	4	10	830	100	Mon	1	N-East	11.5532426834106	7.83059167861938	15.2757263183594	3.87778925895691	55.2509727478027	60
831	1995-04-11	1995	4	11	831	101	Tue	1	N-East	10.5079641342163	6.65260171890259	14.3649730682373	3.50235438346863	57.0345993041992	85
832	1995-04-12	1995	4	12	832	102	Wed	1	N-East	8.22621250152588	3.35033679008484	13.1092309951782	1.04913020133972	54.6210861206055	93
833	1995-04-13	1995	4	13	833	103	Thu	1	N-East	8.11159324645996	1.24245619773865	14.9938993453979	2.85731840133667	56.7831115722656	79
834	1995-04-14	1995	4	14	834	104	Fri	1	N-East	10.4538974761963	4.64205503463745	16.2754192352295	3.81463694572449	52.5824928283691	75
835	1995-04-15	1995	4	15	835	105	Sat	1	N-East	8.65249156951904	6.32868576049805	10.9709377288818	0.583623349666595	60.2543487548828	90
836	1995-04-16	1995	4	16	836	106	Sun	1	N-East	8.41014289855957	5.15815258026123	11.6597204208374	2.19181156158447	59.5099258422852	74
837	1995-04-17	1995	4	17	837	107	Mon	1	N-East	7.82514095306396	6.06138563156128	9.58285617828369	4.77134132385254	77.9696044921875	82
838	1995-04-18	1995	4	18	838	108	Tue	1	N-East	3.34103965759277	-0.174470692873001	6.85538482666016	-1.49181163311005	72.991813659668	83
839	1995-04-19	1995	4	19	839	109	Wed	1	N-East	3.6676926612854	-0.441918939352036	7.78001976013184	-2.85905838012695	56.9842376708984	75
840	1995-04-20	1995	4	20	840	110	Thu	1	N-East	4.52169466018677	0.635215163230896	8.40916728973389	-0.332753449678421	73.0046081542969	90
841	1995-04-21	1995	4	21	841	111	Fri	1	N-East	5.14631748199463	0.0803017690777779	10.2169809341431	-0.877174735069275	57.2895584106445	68
842	1995-04-22	1995	4	22	842	112	Sat	1	N-East	4.30621719360352	-0.185221195220947	8.80270576477051	2.65731859207153	81.7456588745117	72
843	1995-04-23	1995	4	23	843	113	Sun	1	N-East	8.44640445709229	4.52295732498169	12.3718576431274	4.9573187828064	66.5468826293945	88
844	1995-04-24	1995	4	24	844	114	Mon	1	N-East	7.33717775344849	4.90653944015503	9.76236915588379	5.61228227615356	86.6128997802734	82
845	1995-04-25	1995	4	25	845	115	Tue	1	N-East	8.49077796936035	5.80306625366211	11.1725435256958	5.81637668609619	82.2906799316406	89
846	1995-04-26	1995	4	26	846	116	Wed	1	N-East	5.74514389038086	4.18371963500977	7.29858160018921	-1.3976457118988	60.2953948974609	85
847	1995-04-27	1995	4	27	847	117	Thu	1	N-East	4.9475245475769	1.52992928028107	8.36409759521484	-2.39764547348022	55.5912971496582	84
848	1995-04-28	1995	4	28	848	118	Fri	1	N-East	4.60952138900757	-0.208134606480598	9.43375682830811	0.614636898040771	63.8117713928223	88
849	1995-04-29	1995	4	29	849	119	Sat	1	N-East	4.5266056060791	-0.225588575005531	9.30818271636963	1.30644857883453	65.1872024536133	73
850	1995-04-30	1995	4	30	850	120	Sun	1	N-East	11.3483505249023	6.31338739395142	16.3663578033447	5.64094209671021	64.2276382446289	88
851	1995-05-01	1995	5	1	851	121	Mon	1	N-East	12.3206720352173	6.81573295593262	17.8316555023193	7.44913053512573	65.6720657348633	86
852	1995-05-02	1995	5	2	852	122	Tue	1	N-East	14.9955453872681	9.25425624847412	20.7445964813232	7.72865915298462	54.4306030273438	96
853	1995-05-03	1995	5	3	853	123	Wed	1	N-East	15.959153175354	9.24216747283936	22.6899223327637	9.28362274169922	56.8316307067871	67
854	1995-05-04	1995	5	4	854	124	Thu	1	N-East	17.2089672088623	10.0276880264282	24.4076309204102	6.62517976760864	41.6627464294434	99
855	1995-05-05	1995	5	5	855	125	Fri	1	N-East	14.5543880462646	9.12330341339111	19.9930572509766	6.65322399139404	50.494270324707	91
856	1995-05-06	1995	5	6	856	126	Sat	1	N-East	11.9726829528809	5.35658502578735	18.6046504974365	6.22456502914429	56.9334754943848	81
857	1995-05-07	1995	5	7	857	127	Sun	1	N-East	12.7672071456909	10.4967460632324	15.0353136062622	6.42282581329346	60.445140838623	102
858	1995-05-08	1995	5	8	858	128	Mon	1	N-East	10.9950475692749	8.07205581665039	13.9160451889038	5.82456493377686	74.3842391967773	106
859	1995-05-09	1995	5	9	859	129	Tue	1	N-East	8.48974418640137	4.57443428039551	12.4069232940674	1.77369511127472	55.1445236206055	62
860	1995-05-10	1995	5	10	860	130	Wed	1	N-East	6.86791515350342	5.06570196151733	8.66288566589355	-0.0303990002721548	59.7661209106445	87
861	1995-05-11	1995	5	11	861	131	Thu	1	N-East	5.00818014144897	2.54765486717224	7.46443510055542	-2.28536319732666	55.6953964233398	74
862	1995-05-12	1995	5	12	862	132	Fri	1	N-East	4.0699291229248	-0.415697455406189	8.55655384063721	-1.66079795360565	57.7872047424316	85
863	1995-05-13	1995	5	13	863	133	Sat	1	N-East	5.08328199386597	0.984812557697296	9.18356990814209	-3.13039898872375	49.8602867126465	95
864	1995-05-14	1995	5	14	864	134	Sun	1	N-East	5.89880609512329	2.6044921875	9.19248962402344	2.36724662780762	75.5584487915039	90
865	1995-05-15	1995	5	15	865	135	Mon	1	N-East	6.2497992515564	2.70349311828613	9.799729347229	-0.640941798686981	57.3017387390137	72
866	1995-05-16	1995	5	16	866	136	Tue	1	N-East	4.66462087631226	1.06939220428467	8.26341533660889	-0.204094186425209	56.5368461608887	85
867	1995-05-17	1995	5	17	867	137	Wed	1	N-East	5.73551607131958	3.10120558738708	8.36524200439453	3.29590559005737	87.1707305908203	95
868	1995-05-18	1995	5	18	868	138	Thu	1	N-East	5.90285634994507	-0.0873681381344795	11.903413772583	2.62865924835205	63.4251823425293	74
869	1995-05-19	1995	5	19	869	139	Fri	1	N-East	9.60110378265381	4.70619440078735	14.5010604858398	0.824565052986145	51.2432975769043	86
870	1995-05-20	1995	5	20	870	140	Sat	1	N-East	8.67539691925049	6.43997049331665	10.9054117202759	3.74268174171448	78.2946701049805	79
871	1995-05-21	1995	5	21	871	141	Sun	1	N-East	9.61779117584229	5.388014793396	13.8504409790039	4.69416570663452	61.8492317199707	95
872	1995-05-22	1995	5	22	872	142	Mon	1	N-East	13.3061580657959	9.30040645599365	17.3136367797852	4.46376705169678	53.1972427368164	73
873	1995-05-23	1995	5	23	873	143	Tue	1	N-East	12.6129713058472	9.06240653991699	16.1631259918213	6.17778921127319	64.5556869506836	84
874	1995-05-24	1995	5	24	874	144	Wed	1	N-East	10.4236040115356	5.92698764801025	14.926739692688	7.3959059715271	79.0257949829102	96
875	1995-05-25	1995	5	25	875	145	Thu	1	N-East	13.4343309402466	9.11370944976807	17.7569446563721	6.03920221328735	51.8118782043457	96
876	1995-05-26	1995	5	26	876	146	Fri	1	N-East	12.747597694397	8.18122863769531	17.3210544586182	4.15967273712158	46.7375679016113	92
877	1995-05-27	1995	5	27	877	147	Sat	1	N-East	14.5594940185547	11.1661968231201	17.9514122009277	8.93275356292725	68.0252838134766	84
878	1995-05-28	1995	5	28	878	148	Sun	1	N-East	15.3152847290039	11.6960744857788	18.9352550506592	9.65731906890869	68.1445236206055	98
879	1995-05-29	1995	5	29	879	149	Mon	1	N-East	12.80202293396	8.81753444671631	16.7886028289795	6.86550664901733	57.2865943908691	81
880	1995-05-30	1995	5	30	880	150	Tue	1	N-East	13.7059421539307	9.63894844055176	17.7733974456787	6.68597745895386	58.2351036071777	73
881	1995-05-31	1995	5	31	881	151	Wed	1	N-East	12.3516826629639	8.51125335693359	16.1924896240234	6.59007167816162	61.9977531433105	82
882	1995-06-01	1995	6	1	882	152	Thu	1	N-East	12.1612110137939	9.29074859619141	15.0301637649536	7.92865943908691	77.3187255859375	87
883	1995-06-02	1995	6	2	883	153	Fri	1	N-East	11.4970808029175	8.20743656158447	14.7860155105591	7.92865943908691	76.5105438232422	80
884	1995-06-03	1995	6	3	884	154	Sat	1	N-East	11.8034181594849	7.54182910919189	16.0668926239014	9.31228256225586	83.5193481445312	89
885	1995-06-04	1995	6	4	885	155	Sun	1	N-East	11.8040294647217	8.97488307952881	14.6284551620483	8.44913005828857	77.3169860839844	79
886	1995-06-05	1995	6	5	886	156	Mon	1	N-East	11.6770715713501	8.12230396270752	15.2319974899292	5.18362331390381	59.8784027099609	74
887	1995-06-06	1995	6	6	887	157	Tue	1	N-East	13.4552450180054	10.1165151596069	16.791955947876	6.89007186889648	59.9819869995117	83
888	1995-06-07	1995	6	7	888	158	Wed	1	N-East	10.9826011657715	8.01140022277832	13.9517841339111	4.61228227615356	69.3444213867188	76
889	1995-06-08	1995	6	8	889	159	Thu	1	N-East	9.87058925628662	6.64773845672607	13.0902643203735	4.07778930664062	63.0544548034668	70
890	1995-06-09	1995	6	9	890	160	Fri	1	N-East	10.5950498580933	6.67903661727905	14.512978553772	4.33275365829468	63.4801406860352	80
891	1995-06-10	1995	6	10	891	161	Sat	1	N-East	9.45351696014404	7.36314725875854	11.5396575927734	8.61637687683105	94.5122756958008	75
892	1995-06-11	1995	6	11	892	162	Sun	1	N-East	9.47921848297119	7.98611259460449	10.9630794525146	5.16141271591187	71.5257949829102	85
893	1995-06-12	1995	6	12	893	163	Mon	1	N-East	8.61504459381104	6.15730237960815	11.0686082839966	1.92282521724701	63.0520973205566	72
894	1995-06-13	1995	6	13	894	164	Tue	1	N-East	9.86833953857422	7.42177152633667	12.3124132156372	4.34503602981567	68.4947738647461	71
895	1995-06-14	1995	6	14	895	165	Wed	1	N-East	11.9918737411499	7.61882066726685	16.366907119751	5.19007158279419	54.5749206542969	91
896	1995-06-15	1995	6	15	896	166	Thu	1	N-East	12.3572416305542	8.59876251220703	16.1180553436279	6.3532247543335	67.5135116577148	101
897	1995-06-16	1995	6	16	897	167	Fri	1	N-East	12.2139492034912	8.36440849304199	16.069709777832	6.03684759140015	63.3240509033203	81
898	1995-06-17	1995	6	17	898	168	Sat	1	N-East	13.5834302902222	9.45282363891602	17.7162647247314	7.96550703048706	60.5801467895508	91
899	1995-06-18	1995	6	18	899	169	Sun	1	N-East	11.8767232894897	7.04629278182983	16.7137775421143	3.92865943908691	50.4713401794434	86
900	1995-06-19	1995	6	19	900	170	Mon	1	N-East	15.562891960144	11.9427242279053	19.1842994689941	11.3696012496948	67.6848602294922	89
901	1995-06-20	1995	6	20	901	171	Tue	1	N-East	17.4863147735596	14.6073932647705	20.3619899749756	12.8327541351318	70.2182159423828	98
902	1995-06-21	1995	6	21	902	172	Wed	1	N-East	13.2538185119629	8.86681747436523	17.6467761993408	3.99007201194763	47.5848541259766	92
903	1995-06-22	1995	6	22	903	173	Thu	1	N-East	13.7432174682617	7.55155944824219	19.9468879699707	6.3532247543335	50.235725402832	74
904	1995-06-23	1995	6	23	904	174	Fri	1	N-East	13.0439910888672	7.44787693023682	18.6516609191895	5.9655065536499	50.9111557006836	64
905	1995-06-24	1995	6	24	905	175	Sat	1	N-East	12.3612384796143	9.62212753295898	15.100305557251	10.9204702377319	87.0187377929688	95
906	1995-06-25	1995	6	25	906	176	Sun	1	N-East	12.381667137146	9.87102890014648	14.8902826309204	9.94913005828857	93.5877151489258	91
907	1995-06-26	1995	6	26	907	177	Mon	1	N-East	14.2992811203003	8.71239471435547	19.8959827423096	6.91463708877563	54.303581237793	71
908	1995-06-27	1995	6	27	908	178	Tue	1	N-East	13.958158493042	8.16928958892822	19.7593078613281	4.0637674331665	44.1369514465332	77
909	1995-06-28	1995	6	28	909	179	Wed	1	N-East	15.6464214324951	9.33970069885254	21.9680633544922	10.1327533721924	61.5275344848633	77
910	1995-06-29	1995	6	29	910	180	Thu	1	N-East	16.763557434082	8.86853408813477	24.6796169281006	4.3269190788269	33.8229293823242	63
911	1995-06-30	1995	6	30	911	181	Fri	1	N-East	14.6512088775635	11.8845472335815	17.4166011810303	10.3122825622559	85.5532150268555	66
912	1995-07-01	1995	7	1	912	182	Sat	1	N-East	12.5284242630005	9.30392932891846	15.7511863708496	4.70644855499268	53.9912986755371	63
913	1995-07-02	1995	7	2	913	183	Sun	1	N-East	12.7765779495239	6.51344156265259	19.054313659668	7.92047071456909	58.9801406860352	70
914	1995-07-03	1995	7	3	914	184	Mon	1	N-East	12.4021167755127	9.56546974182129	15.2367687225342	5.26724720001221	61.689453125	66
915	1995-07-04	1995	7	4	915	185	Tue	1	N-East	14.4884557723999	9.10549640655518	19.8795204162598	6.37369585037231	58.9736976623535	68
916	1995-07-05	1995	7	5	916	186	Wed	1	N-East	13.2069473266602	8.59405994415283	17.8272476196289	10.2245635986328	69.6357269287109	78
917	1995-07-06	1995	7	6	917	187	Thu	1	N-East	17.12229347229	14.9100475311279	19.3329105377197	13.045036315918	67.38720703125	94
918	1995-07-07	1995	7	7	918	188	Fri	1	N-East	17.9740333557129	15.2752361297607	20.6708240509033	13.6000003814697	70.8064498901367	89
919	1995-07-08	1995	7	8	919	189	Sat	1	N-East	14.2108612060547	9.53645420074463	18.8924903869629	7.36960124969482	55.4772758483887	71
920	1995-07-09	1995	7	9	920	190	Sun	1	N-East	14.8442401885986	11.9433031082153	17.7461090087891	9.77369499206543	67.4240570068359	74
921	1995-07-10	1995	7	10	921	191	Mon	1	N-East	14.1351928710938	9.68640613555908	18.5878639221191	10.3532247543335	69.7994918823242	74
922	1995-07-11	1995	7	11	922	192	Tue	1	N-East	15.8964796066284	13.6879892349243	18.1010684967041	13.7795295715332	91.0385818481445	77
923	1995-07-12	1995	7	12	923	193	Wed	1	N-East	19.2555809020996	13.9903860092163	24.5245132446289	14.8122825622559	71.3796310424805	93
924	1995-07-13	1995	7	13	924	194	Thu	1	N-East	17.3770275115967	12.2771596908569	22.4871406555176	10.4614124298096	54.5656089782715	87
925	1995-07-14	1995	7	14	925	195	Fri	1	N-East	18.1173267364502	14.7243099212646	21.5142669677734	13.2918119430542	74.1339721679688	80
926	1995-07-15	1995	7	15	926	196	Sat	1	N-East	16.3362483978271	12.1818656921387	20.4949607849121	13.100001335144	78.5316314697266	73
927	1995-07-16	1995	7	16	927	197	Sun	1	N-East	15.7946929931641	12.1871471405029	19.401050567627	8.00235462188721	56.4345970153809	76
928	1995-07-17	1995	7	17	928	198	Mon	1	N-East	16.8320236206055	13.0846939086914	20.5806655883789	10.1777896881104	57.250358581543	75
929	1995-07-18	1995	7	18	929	199	Tue	1	N-East	18.7943553924561	13.899338722229	23.6927852630615	14.4918117523193	68.6136169433594	83
930	1995-07-19	1995	7	19	930	200	Wed	1	N-East	20.0178146362305	13.8853378295898	26.1642265319824	15.3491306304932	60.451587677002	85
931	1995-07-20	1995	7	20	931	201	Thu	1	N-East	20.8191528320312	17.953556060791	23.6833801269531	13.161413192749	58.8971366882324	83
932	1995-07-21	1995	7	21	932	202	Fri	1	N-East	16.878604888916	13.5293474197388	20.2279491424561	6.12865924835205	49.0736961364746	64
933	1995-07-22	1995	7	22	933	203	Sat	1	N-East	14.4059009552002	9.82837867736816	18.9890041351318	5.40818881988525	49.4058303833008	67
934	1995-07-23	1995	7	23	934	204	Sun	1	N-East	15.5991344451904	12.4660930633545	18.7308654785156	10.1491298675537	62.9514846801758	68
935	1995-07-24	1995	7	24	935	205	Mon	1	N-East	15.27064037323	10.9560890197754	19.5928707122803	9.87134075164795	65.3064498901367	76
936	1995-07-25	1995	7	25	936	206	Tue	1	N-East	18.3112659454346	11.9502305984497	24.7357025146484	10.9491300582886	54.7966270446777	95
937	1995-07-26	1995	7	26	937	207	Wed	1	N-East	15.5834941864014	10.1907453536987	20.9843482971191	13.1532249450684	73.970832824707	70
938	1995-07-27	1995	7	27	938	208	Thu	1	N-East	19.58176612854	14.428915977478	24.7434463500977	15.1081886291504	75.3053283691406	62
939	1995-07-28	1995	7	28	939	209	Fri	1	N-East	19.769983291626	14.3687334060669	25.1797885894775	13.975435256958	61.8766632080078	74
940	1995-07-29	1995	7	29	940	210	Sat	1	N-East	20.5223484039307	15.2550745010376	25.7963981628418	15.7918119430542	66.3673477172852	89
941	1995-07-30	1995	7	30	941	211	Sun	1	N-East	19.2025871276855	13.4895725250244	24.9263534545898	15.5959062576294	80.8731842041016	66
942	1995-07-31	1995	7	31	942	212	Mon	1	N-East	20.0793018341064	15.1142606735229	25.0526905059814	15.3204708099365	75.106559753418	81
943	1995-08-01	1995	8	1	943	213	Tue	1	N-East	20.7678260803223	15.6950168609619	25.8492946624756	16.8245639801025	78.8865966796875	80
944	1995-08-02	1995	8	2	944	214	Wed	1	N-East	20.3578052520752	15.6997022628784	25.0214557647705	15.1655073165894	64.1574249267578	87
945	1995-08-03	1995	8	3	945	215	Thu	1	N-East	16.8766212463379	14.1762142181396	19.5795936584473	13.375433921814	85.1672439575195	64
946	1995-08-04	1995	8	4	946	216	Fri	1	N-East	14.8912239074707	11.6360988616943	18.1474952697754	7.73684787750244	61.8702163696289	72
947	1995-08-05	1995	8	5	947	217	Sat	1	N-East	15.2648096084595	10.7613286972046	19.7784252166748	9.57952976226807	64.0900726318359	80
948	1995-08-06	1995	8	6	948	218	Sun	1	N-East	14.3366661071777	7.98657321929932	20.7019939422607	11.1327533721924	66.8924255371094	72
949	1995-08-07	1995	8	7	949	219	Mon	1	N-East	13.7676439285278	11.0227355957031	16.5105724334717	7.64503622055054	60.700611114502	73
950	1995-08-08	1995	8	8	950	220	Tue	1	N-East	13.4531135559082	7.08400440216064	19.8379611968994	6.74912929534912	52.1456527709961	77
951	1995-08-09	1995	8	9	951	221	Wed	1	N-East	15.544303894043	7.84504365921021	23.2620182037354	8.0269193649292	49.1024589538574	71
952	1995-08-10	1995	8	10	952	222	Thu	1	N-East	17.2404136657715	9.4416675567627	25.0592498779297	10.4900722503662	52.2007141113281	65
953	1995-08-11	1995	8	11	953	223	Fri	1	N-East	18.095796585083	11.4468755722046	24.7618637084961	13.3655071258545	64.7457580566406	79
954	1995-08-12	1995	8	12	954	224	Sat	1	N-East	19.8209400177002	14.9553203582764	24.6945648193359	10.7228260040283	46.1135101318359	82
955	1995-08-13	1995	8	13	955	225	Sun	1	N-East	16.7657203674316	12.2003726959229	21.3379249572754	10.3795289993286	60.0134086608887	82
956	1995-08-14	1995	8	14	956	226	Mon	1	N-East	16.7246608734131	11.4580001831055	21.9998817443848	11.6122827529907	63.3461570739746	76
957	1995-08-15	1995	8	15	957	227	Tue	1	N-East	19.7190380096436	13.5173187255859	25.9322280883789	12.6409425735474	54.5859794616699	65
958	1995-08-16	1995	8	16	958	228	Wed	1	N-East	19.7670783996582	12.7249441146851	26.8238620758057	13.9959058761597	60.957935333252	72
959	1995-08-17	1995	8	17	959	229	Thu	1	N-East	19.4421005249023	12.120756149292	26.7789192199707	12.710542678833	53.9118766784668	68
960	1995-08-18	1995	8	18	960	230	Fri	1	N-East	19.8179111480713	14.6141891479492	25.0335483551025	13.2982597351074	57.3311195373535	72
961	1995-08-19	1995	8	19	961	231	Sat	1	N-East	19.8162860870361	15.518669128418	24.1200428009033	15.4614124298096	74.6012268066406	64
962	1995-08-20	1995	8	20	962	232	Sun	1	N-East	20.612455368042	15.1688165664673	26.0642414093018	15.5204706192017	73.8725662231445	74
963	1995-08-21	1995	8	21	963	233	Mon	1	N-East	21.8196849822998	14.2408256530762	29.4157199859619	13.3491306304932	51.7772789001465	67
964	1995-08-22	1995	8	22	964	234	Tue	1	N-East	21.5846271514893	14.3615999221802	28.8226127624512	12.6081886291504	50.4994888305664	78
965	1995-08-23	1995	8	23	965	235	Wed	1	N-East	18.2583408355713	13.5179948806763	22.9973602294922	9.27779006958008	52.7369499206543	63
966	1995-08-24	1995	8	24	966	236	Thu	1	N-East	15.9571304321289	10.3486585617065	21.5677394866943	11.1204710006714	64.5029678344727	56
967	1995-08-25	1995	8	25	967	237	Fri	1	N-East	16.9856719970703	14.2248992919922	19.7326240539551	10.0836238861084	58.8689842224121	68
968	1995-08-26	1995	8	26	968	238	Sat	1	N-East	13.2939014434814	10.7846908569336	15.8007678985596	10.2836236953735	84.3730850219727	62
969	1995-08-27	1995	8	27	969	239	Sun	1	N-East	13.7589778900146	10.0663623809814	17.4528579711914	7.10173988342285	66.1753311157227	72
970	1995-08-28	1995	8	28	970	240	Mon	1	N-East	12.5950489044189	8.39970874786377	16.7915878295898	4.60818862915039	57.0631523132324	65
971	1995-08-29	1995	8	29	971	241	Tue	1	N-East	12.8521528244019	10.1040067672729	15.5963792800903	7.24912977218628	68.4374542236328	60
972	1995-08-30	1995	8	30	972	242	Wed	1	N-East	15.4224319458008	9.96854877471924	20.8834285736084	12.1081886291504	74.8069610595703	66
973	1995-08-31	1995	8	31	973	243	Thu	1	N-East	15.499340057373	13.4754343032837	17.5202789306641	10.6122827529907	71.0286560058594	82
974	1995-09-01	1995	9	1	974	244	Fri	1	N-East	15.6246471405029	13.2469940185547	17.9994049072266	10.4163761138916	65.9292678833008	82
975	1995-09-02	1995	9	2	975	245	Sat	1	N-East	13.5436372756958	11.6603546142578	15.4206619262695	10.1409425735474	79.3363418579102	61
976	1995-09-03	1995	9	3	976	246	Sun	1	N-East	13.4187746047974	9.81958770751953	17.0169448852539	11.5228242874146	83.8070678710938	77
977	1995-09-04	1995	9	4	977	247	Mon	1	N-East	13.4418716430664	10.7297134399414	16.1523971557617	8.13684749603271	67.2579345703125	73
978	1995-09-05	1995	9	5	978	248	Tue	1	N-East	12.1397333145142	10.1801490783691	14.0926322937012	10.1163768768311	86.9801406860352	62
979	1995-09-06	1995	9	6	979	249	Wed	1	N-East	14.1383371353149	11.4573230743408	16.8158683776855	10.9081878662109	77.3988723754883	73
980	1995-09-07	1995	9	7	980	250	Thu	1	N-East	14.0141382217407	12.3280944824219	15.6930923461914	13.399998664856	92.4228363037109	86
981	1995-09-08	1995	9	8	981	251	Fri	1	N-East	15.1235637664795	13.2963008880615	16.94580078125	15.1000003814697	93.8532257080078	89
982	1995-09-09	1995	9	9	982	252	Sat	1	N-East	13.7596006393433	11.8354368209839	15.6770267486572	10.636848449707	79.8725738525391	75
983	1995-09-10	1995	9	10	983	253	Sun	1	N-East	15.0389623641968	9.42681407928467	20.6568546295166	10.8081884384155	70.8579330444336	79
984	1995-09-11	1995	9	11	984	254	Mon	1	N-East	13.6850547790527	11.4810705184937	15.8839178085327	11.4204702377319	84.2684707641602	72
985	1995-09-12	1995	9	12	985	255	Tue	1	N-East	14.2017374038696	9.63656425476074	18.7714996337891	8.60235500335693	61.6919136047363	69
986	1995-09-13	1995	9	13	986	256	Wed	1	N-East	12.6461315155029	6.99752283096313	18.3028526306152	9.94913005828857	72.0415573120117	72
987	1995-09-14	1995	9	14	987	257	Thu	1	N-East	11.939715385437	6.57143259048462	17.3157272338867	11.057318687439	89.0023574829102	73
988	1995-09-15	1995	9	15	988	258	Fri	1	N-East	13.490553855896	11.0171661376953	15.9608297348022	9.12865924835205	71.5883331298828	73
989	1995-09-16	1995	9	16	989	259	Sat	1	N-East	13.2459583282471	9.79209613800049	16.7044334411621	9.05322456359863	69.5947799682617	82
990	1995-09-17	1995	9	17	990	260	Sun	1	N-East	13.9730472564697	11.3310899734497	16.6136379241943	12.0368480682373	85.0333786010742	66
991	1995-09-18	1995	9	18	991	261	Mon	1	N-East	14.0882616043091	11.9514684677124	16.2203998565674	12.1163768768311	87.6275405883789	68
992	1995-09-19	1995	9	19	992	262	Tue	1	N-East	14.2608728408813	11.5074052810669	17.0135746002197	11.5532245635986	80.9234313964844	72
993	1995-09-20	1995	9	20	993	263	Wed	1	N-East	13.1692142486572	9.25706672668457	17.0822734832764	7.45322418212891	64.6766662597656	90
994	1995-09-21	1995	9	21	994	264	Thu	1	N-East	12.9096193313599	7.48232078552246	18.3453178405762	9.74913024902344	70.55322265625	68
995	1995-09-22	1995	9	22	995	265	Fri	1	N-East	13.6395921707153	9.54416275024414	17.7375869750977	9.35905742645264	67.3403244018555	76
996	1995-09-23	1995	9	23	996	266	Sat	1	N-East	13.0605478286743	8.63700675964355	17.4895153045654	6.93275356292725	59.3415565490723	77
997	1995-09-24	1995	9	24	997	267	Sun	1	N-East	11.3701200485229	8.7502965927124	13.980562210083	7.00818824768066	73.6047058105469	69
998	1995-09-25	1995	9	25	998	268	Mon	1	N-East	10.5607891082764	4.5521092414856	16.580207824707	11.463152885437	85.3444137573242	76
999	1995-09-26	1995	9	26	999	269	Tue	1	N-East	12.7636623382568	9.54170608520508	15.984766960144	5.27543544769287	61.2625350952148	71
1000	1995-09-27	1995	9	27	1000	270	Wed	1	N-East	8.89780807495117	6.3305287361145	11.4623775482178	1.26724660396576	52.8344955444336	78
1001	1995-09-28	1995	9	28	1001	271	Thu	1	N-East	7.29967498779297	1.69106495380402	12.9180698394775	1.52630484104156	58.1356201171875	96
1002	1995-09-29	1995	9	29	1002	272	Fri	1	N-East	9.07942962646484	4.16545009613037	14.0629377365112	3.00000023841858	59.9181137084961	79
1003	1995-09-30	1995	9	30	1003	273	Sat	1	N-East	10.4319543838501	6.33305311203003	14.5358667373657	5.53275346755981	68.2924270629883	74
1004	1995-10-01	1995	10	1	1004	274	Sun	1	N-East	12.0486907958984	8.43575763702393	15.6615133285522	11.1403274536133	82.4572143554688	82
1005	1995-10-02	1995	10	2	1005	275	Mon	1	N-East	13.2563581466675	9.42879104614258	17.0846519470215	9.6204719543457	73.243293762207	84
1006	1995-10-03	1995	10	3	1006	276	Tue	1	N-East	13.9193572998047	11.857081413269	15.975564956665	11.8163766860962	84.1339797973633	88
1007	1995-10-04	1995	10	4	1007	277	Wed	1	N-East	14.3127031326294	11.3598909378052	17.2649822235107	10.1825304031372	74.185432434082	64
1008	1995-10-05	1995	10	5	1008	278	Thu	1	N-East	12.478949546814	9.46277618408203	15.4930505752563	5.16550636291504	55.4988784790039	71
1009	1995-10-06	1995	10	6	1009	279	Fri	1	N-East	13.0427141189575	9.50614738464355	16.5802898406982	11.5040950775146	85.6409378051758	82
1010	1995-10-07	1995	10	7	1010	280	Sat	1	N-East	14.1471786499023	11.4240560531616	16.8676700592041	10.0959062576294	74.0883331298828	83
1011	1995-10-08	1995	10	8	1011	281	Sun	1	N-East	18.2085819244385	13.8830728530884	22.5396423339844	8.66550731658936	49.1398162841797	92
1012	1995-10-09	1995	10	9	1012	282	Mon	1	N-East	16.2977409362793	12.4435005187988	20.1541080474854	12.4409418106079	74.0859756469727	74
1013	1995-10-10	1995	10	10	1013	283	Tue	1	N-East	12.2664928436279	8.09005260467529	16.4485454559326	8.34268093109131	67.3222122192383	73
1014	1995-10-11	1995	10	11	1014	284	Wed	1	N-East	11.3231954574585	6.54558229446411	16.10693359375	9.53684711456299	75.7223129272461	85
1015	1995-10-12	1995	10	12	1015	285	Thu	1	N-East	14.3047437667847	11.1310596466064	17.4780941009521	11.7918119430542	70.9421691894531	70
1016	1995-10-13	1995	10	13	1016	286	Fri	1	N-East	15.5437793731689	11.6411352157593	19.4459972381592	11.1696004867554	68.5065536499023	86
1017	1995-10-14	1995	10	14	1017	287	Sat	1	N-East	13.0129594802856	11.4025640487671	14.6206741333008	11.3286600112915	87.7544555664062	75
1018	1995-10-15	1995	10	15	1018	288	Sun	1	N-East	14.9491033554077	11.7507772445679	18.14914894104	12.0245656967163	81.0129013061523	74
1019	1995-10-16	1995	10	16	1019	289	Mon	1	N-East	13.3948926925659	10.2511196136475	16.5387210845947	9.80818843841553	71.8310089111328	70
1020	1995-10-17	1995	10	17	1020	290	Tue	1	N-East	14.5654220581055	10.7818336486816	18.3473701477051	10.4450359344482	67.5404357910156	76
1021	1995-10-18	1995	10	18	1021	291	Wed	1	N-East	10.8379106521606	7.25913715362549	14.4159078598022	4.2696008682251	56.432243347168	84
1022	1995-10-19	1995	10	19	1022	292	Thu	1	N-East	12.6406898498535	10.617621421814	14.6599102020264	8.92456436157227	71.2105407714844	83
1023	1995-10-20	1995	10	20	1023	293	Fri	1	N-East	10.2436408996582	6.76682662963867	13.7202396392822	2.34913015365601	59.3415565490723	78
1024	1995-10-21	1995	10	21	1024	294	Sat	1	N-East	6.72299909591675	1.74036312103271	11.7131471633911	2.7286593914032	65.5579376220703	90
1025	1995-10-22	1995	10	22	1025	295	Sun	1	N-East	10.484076499939	7.46966171264648	13.5004358291626	7.84913063049316	71.0234375	87
1026	1995-10-23	1995	10	23	1026	296	Mon	1	N-East	12.7567453384399	10.4547529220581	15.0537357330322	8.41054248809814	68.7977447509766	75
1027	1995-10-24	1995	10	24	1027	297	Tue	1	N-East	13.1234750747681	8.12036514282227	18.1310729980469	10.1409425735474	70.0328598022461	80
1028	1995-10-25	1995	10	25	1028	298	Wed	1	N-East	10.7301187515259	7.75267505645752	13.7057800292969	2.84094190597534	55.3988723754883	61
1029	1995-10-26	1995	10	26	1029	299	Thu	1	N-East	12.3310613632202	9.41761875152588	15.2454328536987	6.9450364112854	60.329273223877	73
1030	1995-10-27	1995	10	27	1030	300	Fri	1	N-East	9.9426383972168	7.15581607818604	12.7268161773682	3.02865934371948	63.6357192993164	74
1031	1995-10-28	1995	10	28	1031	301	Sat	1	N-East	8.75592136383057	5.23445177078247	12.276647567749	4.29590606689453	70.7163696289062	74
1032	1995-10-29	1995	10	29	1032	302	Sun	1	N-East	6.62113046646118	1.55233180522919	11.6959438323975	2.88597774505615	72.4766693115234	73
1033	1995-10-30	1995	10	30	1033	303	Mon	1	N-East	8.44078636169434	3.74715399742126	13.1408529281616	6.21637678146362	77.9906845092773	88
1034	1995-10-31	1995	10	31	1034	304	Tue	1	N-East	10.938497543335	7.27806663513184	14.5999031066895	10.4959058761597	81.7497482299805	95
1035	1995-11-01	1995	11	1	1035	305	Wed	1	N-East	9.16662216186523	7.75217962265015	10.5716876983643	5.52865934371948	77.0187377929688	62
1036	1995-11-02	1995	11	2	1036	306	Thu	1	N-East	8.23243808746338	4.38176345825195	12.0867586135864	3.51228260993958	68.9795303344727	76
1037	1995-11-03	1995	11	3	1037	307	Fri	1	N-East	6.61010551452637	4.2997088432312	8.91847133636475	2.3204710483551	69.9573211669922	81
1038	1995-11-04	1995	11	4	1038	308	Sat	1	N-East	4.70290994644165	0.0323550216853619	9.37778377532959	-1.11811649799347	62.735725402832	96
1039	1995-11-05	1995	11	5	1039	309	Sun	1	N-East	3.54702043533325	-1.28376388549805	8.38456439971924	0.345035940408707	67.9667358398438	77
1040	1995-11-06	1995	11	6	1040	310	Mon	1	N-East	5.447181224823	0.0476101972162724	10.8547811508179	2.57369518280029	76.3012313842773	90
1041	1995-11-07	1995	11	7	1041	311	Tue	1	N-East	10.2633790969849	5.33230686187744	15.1991958618164	9.7081880569458	79.5719528198242	78
1042	1995-11-08	1995	11	8	1042	312	Wed	1	N-East	10.8792247772217	8.55690574645996	13.194224357605	8.92047023773193	77.4965209960938	81
1043	1995-11-09	1995	11	9	1043	313	Thu	1	N-East	7.19546508789062	4.97183322906494	9.4151554107666	4.89999961853027	80.7070693969727	71
1044	1995-11-10	1995	11	10	1044	314	Fri	1	N-East	5.16295337677002	1.17565786838531	9.15373611450195	6.38771772384644	94.0642700195312	86
1045	1995-11-11	1995	11	11	1045	315	Sat	1	N-East	8.67679214477539	6.21927642822266	11.1322298049927	9.5836238861084	94.55322265625	79
1046	1995-11-12	1995	11	12	1046	316	Sun	1	N-East	10.5391225814819	9.7830228805542	11.2847232818604	9.89590549468994	91.5245590209961	87
1047	1995-11-13	1995	11	13	1047	317	Mon	1	N-East	10.6097650527954	9.74114513397217	11.4667510986328	9.80818843841553	90.4292678833008	100
1048	1995-11-14	1995	11	14	1048	318	Tue	1	N-East	10.6712398529053	8.7385950088501	12.5998868942261	8.10818862915039	85.1456527709961	75
1049	1995-11-15	1995	11	15	1049	319	Wed	1	N-East	8.99221611022949	7.13055229187012	10.8485593795776	8.60818862915039	92.3292694091797	79
1050	1995-11-16	1995	11	16	1050	320	Thu	1	N-East	3.81655240058899	1.69427990913391	5.93151187896729	1.85905838012695	85.5110549926758	62
1051	1995-11-17	1995	11	17	1051	321	Fri	1	N-East	0.878703951835632	-0.906225323677063	2.65599703788757	-0.371340751647949	88.1344833374023	74
1052	1995-11-18	1995	11	18	1052	322	Sat	1	N-East	2.31919026374817	-0.63444709777832	5.27144527435303	-2.00818848609924	73.007568359375	78
1053	1995-11-19	1995	11	19	1053	323	Sun	1	N-East	5.41083431243896	2.06814241409302	8.75382804870605	2.59590578079224	74.9689865112305	82
1054	1995-11-20	1995	11	20	1054	324	Mon	1	N-East	4.3649525642395	1.73220002651215	6.99481773376465	3.41637682914734	80.4883270263672	100
1055	1995-11-21	1995	11	21	1055	325	Tue	1	N-East	6.95537233352661	5.28910160064697	8.61638069152832	5.52456521987915	89.8555755615234	82
1056	1995-11-22	1995	11	22	1056	326	Wed	1	N-East	8.44330501556396	5.82827663421631	11.0535221099854	5.77134084701538	77.1081848144531	72
1057	1995-11-23	1995	11	23	1057	327	Thu	1	N-East	9.70077991485596	6.6995906829834	12.7005491256714	8.10000038146973	74.6614074707031	79
1058	1995-11-24	1995	11	24	1058	328	Fri	1	N-East	11.0875949859619	9.82985877990723	12.3368806838989	8.2426815032959	81.2338790893555	88
1059	1995-11-25	1995	11	25	1059	329	Sat	1	N-East	8.50873470306396	6.18617677688599	10.8235960006714	3.424565076828	68.1497421264648	100
1060	1995-11-26	1995	11	26	1060	330	Sun	1	N-East	6.98029327392578	4.94904899597168	9.00932502746582	7.72456502914429	92.1269226074219	82
1061	1995-11-27	1995	11	27	1061	331	Mon	1	N-East	6.8630805015564	5.0794734954834	8.64133358001709	5.83275365829468	87.4368515014648	98
1062	1995-11-28	1995	11	28	1062	332	Tue	1	N-East	6.92677640914917	4.03331470489502	9.81650447845459	6.861412525177	92.2655029296875	90
1063	1995-11-29	1995	11	29	1063	333	Wed	1	N-East	8.42710781097412	6.90172052383423	9.94485282897949	9.07952976226807	94.7754364013672	89
1064	1995-11-30	1995	11	30	1064	334	Thu	1	N-East	7.43522977828979	6.51082229614258	8.34809017181396	4.51637649536133	77.2491226196289	92
1065	1995-12-01	1995	12	1	1065	335	Fri	1	N-East	6.24109745025635	5.35764122009277	7.12455368041992	3.92456531524658	85.2713470458984	81
1066	1995-12-02	1995	12	2	1066	336	Sat	1	N-East	7.06346750259399	5.19400548934937	8.9338846206665	6.92047119140625	95.0754318237305	104
1067	1995-12-03	1995	12	3	1067	337	Sun	1	N-East	8.12180137634277	7.07788324356079	9.17236232757568	8.12047100067139	92.4801483154297	93
1068	1995-12-04	1995	12	4	1068	338	Mon	1	N-East	6.09216976165771	4.78106260299683	7.40327739715576	2.03684759140015	71.226921081543	70
1069	1995-12-05	1995	12	5	1069	339	Tue	1	N-East	3.32435607910156	1.40614485740662	5.24256753921509	-1.26550686359406	70.2864837646484	99
1070	1995-12-06	1995	12	6	1070	340	Wed	1	N-East	2.66237378120422	0.461897492408752	4.86284971237183	0.228659242391586	74.2918167114258	77
1071	1995-12-07	1995	12	7	1071	341	Thu	1	N-East	1.56445646286011	-0.143644973635674	3.27255845069885	0.03275341168046	91.6924285888672	75
1072	1995-12-08	1995	12	8	1072	342	Fri	1	N-East	-0.808545708656311	-2.63316297531128	1.02879643440247	-1.41228258609772	87.1801452636719	70
1073	1995-12-09	1995	12	9	1073	343	Sat	1	N-East	1.79511487483978	-2.34268975257874	5.97097253799438	0.795905888080597	86.0538482666016	96
1074	1995-12-10	1995	12	10	1074	344	Sun	1	N-East	5.43629693984985	1.90933668613434	8.9632568359375	5.18771743774414	85.211669921875	70
1075	1995-12-11	1995	12	11	1075	345	Mon	1	N-East	3.66702437400818	1.67148554325104	5.66256237030029	4.06724643707275	97.8198547363281	89
1076	1995-12-12	1995	12	12	1076	346	Tue	1	N-East	4.79835033416748	1.91611337661743	7.68058776855469	4.03684759140015	95.2467880249023	88
1077	1995-12-13	1995	12	13	1077	347	Wed	1	N-East	5.49644327163696	3.84632730484009	7.14655923843384	1.26141273975372	69.4602890014648	87
1078	1995-12-14	1995	12	14	1078	348	Thu	1	N-East	4.93309307098389	3.98137402534485	5.8848123550415	0.871340751647949	71.3748168945312	100
1079	1995-12-15	1995	12	15	1079	349	Fri	1	N-East	4.83497095108032	3.50518345832825	6.16475915908813	0.332753449678421	66.7187271118164	84
1080	1995-12-16	1995	12	16	1080	350	Sat	1	N-East	5.64847755432129	4.50353956222534	6.79341459274292	0.402354419231415	64.7854690551758	108
1081	1995-12-17	1995	12	17	1081	351	Sun	1	N-East	5.12298536300659	4.07071542739868	6.17525625228882	0.820470869541168	68.0818862915039	116
1082	1995-12-18	1995	12	18	1082	352	Mon	1	N-East	4.97353649139404	3.26311707496643	6.68395566940308	2.90409421920776	86.7842407226562	86
1083	1995-12-19	1995	12	19	1083	353	Tue	1	N-East	3.37881374359131	1.87081015110016	4.88681793212891	0.124565064907074	74.6941680908203	106
1084	1995-12-20	1995	12	20	1084	354	Wed	1	N-East	-0.092423141002655	-2.22098207473755	2.03613591194153	-5.08138847351074	66.0078125	97
1085	1995-12-21	1995	12	21	1085	355	Thu	1	N-East	-0.618394911289215	-5.12711477279663	3.89032459259033	-2.66724681854248	81.1743087768555	113
1086	1995-12-22	1995	12	22	1086	356	Fri	1	N-East	2.4655122756958	-1.12359380722046	6.05461883544922	4.05496406555176	98.3584442138672	125
1087	1995-12-23	1995	12	23	1087	357	Sat	1	N-East	2.71086692810059	0.928893446922302	4.49284076690674	-1.83101367950439	72.38525390625	109
1088	1995-12-24	1995	12	24	1088	358	Sun	1	N-East	-1.18642735481262	-3.94121074676514	1.56835639476776	-4.7081880569458	72.3637619018555	95
1089	1995-12-25	1995	12	25	1089	359	Mon	1	N-East	-1.22881019115448	-3.78134059906006	1.32372045516968	-2.45638298988342	79.5323333740234	101
1090	1995-12-26	1995	12	26	1090	360	Tue	1	N-East	-2.23914456367493	-4.17755222320557	-0.300736516714096	-4.5426812171936	83.280143737793	97
1091	1995-12-27	1995	12	27	1091	361	Wed	1	N-East	-2.75312876701355	-6.12799024581909	0.621732532978058	-8.11811637878418	70.0790176391602	93
1092	1995-12-28	1995	12	28	1092	362	Thu	1	N-East	-4.58659410476685	-8.65499687194824	-0.51819235086441	-7.76315259933472	74.0385818481445	119
1093	1995-12-29	1995	12	29	1093	363	Fri	1	N-East	-5.29852199554443	-9.39061164855957	-1.20643198490143	-6.70235443115234	94.0812683105469	134
1094	1995-12-30	1995	12	30	1094	364	Sat	1	N-East	-2.63877844810486	-8.49695873260498	3.21940064430237	-4.76724672317505	57.0473937988281	165
1095	1995-12-31	1995	12	31	1095	365	Sun	1	N-East	2.38864970207214	1.24374806880951	3.53355145454407	0.846775710582733	81.6397171020508	124
1096	1996-01-01	1996	1	1	1096	1	Mon	1	N-East	2.83415079116821	1.64295649528503	4.02534532546997	2.99181199073792	96.6625442504883	114
1097	1996-01-02	1996	1	2	1097	2	Tue	1	N-East	3.50310468673706	2.59401798248291	4.41219139099121	3.8327534198761	94.4409408569336	111
1098	1996-01-03	1996	1	3	1098	3	Wed	1	N-East	2.95120453834534	1.43336808681488	4.46904134750366	2.81637644767761	94.3000030517578	137
1099	1996-01-04	1996	1	4	1099	4	Thu	1	N-East	3.2359516620636	1.17314767837524	5.29875564575195	1.62456512451172	91.885368347168	121
1100	1996-01-05	1996	1	5	1100	5	Fri	1	N-East	3.81761908531189	2.24061894416809	5.39461946487427	4.72456502914429	94.7000045776367	119
1101	1996-01-06	1996	1	6	1101	6	Sat	1	N-East	4.06432342529297	2.92593121528625	5.20271635055542	3.20409440994263	91.6877136230469	98
1102	1996-01-07	1996	1	7	1102	7	Sun	1	N-East	5.28337049484253	2.25196075439453	8.31478023529053	5.59181118011475	92.6146392822266	94
1103	1996-01-08	1996	1	8	1103	8	Mon	1	N-East	7.04634761810303	4.41102647781372	9.68166732788086	6.57543468475342	91.7391967773438	116
1104	1996-01-09	1996	1	9	1104	9	Tue	1	N-East	8.17934036254883	6.93985509872437	9.41882705688477	6.88771820068359	87.9374618530273	99
1105	1996-01-10	1996	1	10	1105	10	Wed	1	N-East	7.12517118453979	6.12088918685913	8.12945556640625	5.6959056854248	89.3538436889648	113
1106	1996-01-11	1996	1	11	1106	11	Thu	1	N-East	6.2250542640686	4.33202075958252	8.11808681488037	5.64094209671021	91.6029739379883	119
1107	1996-01-12	1996	1	12	1107	12	Fri	1	N-East	7.85269355773926	5.87353563308716	9.83185195922852	6.41228246688843	81.9913024902344	110
1108	1996-01-13	1996	1	13	1108	13	Sat	1	N-East	9.44167995452881	8.26430511474609	10.6190557479858	4.93684768676758	73.3316268920898	110
1109	1996-01-14	1996	1	14	1109	14	Sun	1	N-East	7.35619258880615	6.36782360076904	8.34456157684326	5.82456493377686	84.8094177246094	98
1110	1996-01-15	1996	1	15	1110	15	Mon	1	N-East	6.08473634719849	4.87424755096436	7.29522514343262	6.18771696090698	94.2842330932617	103
1111	1996-01-16	1996	1	16	1111	16	Tue	1	N-East	4.63741493225098	2.05013942718506	7.22469043731689	5.05322408676147	92.1088104248047	91
1112	1996-01-17	1996	1	17	1112	17	Wed	1	N-East	5.19776487350464	2.91085314750671	7.48467683792114	5.54677581787109	90.8210830688477	91
1113	1996-01-18	1996	1	18	1113	18	Thu	1	N-East	5.09898853302002	4.061607837677	6.13636922836304	4.32047128677368	89.4023590087891	107
1114	1996-01-19	1996	1	19	1114	19	Fri	1	N-East	3.41580295562744	2.1212432384491	4.71036291122437	2.80818819999695	94.2344970703125	89
1115	1996-01-20	1996	1	20	1115	20	Sat	1	N-East	3.25412964820862	2.039790391922	4.46846866607666	1.98362326622009	87.7911987304688	104
1116	1996-01-21	1996	1	21	1116	21	Sun	1	N-East	1.76808512210846	0.807908535003662	2.72826218605042	-0.887717485427856	81.9485092163086	68
1117	1996-01-22	1996	1	22	1117	22	Mon	1	N-East	2.45347046852112	1.10030210018158	3.80663824081421	0.608188331127167	82.6649017333984	98
1118	1996-01-23	1996	1	23	1118	23	Tue	1	N-East	2.63827443122864	1.65032958984375	3.62621903419495	-0.987717509269714	75.6245651245117	88
1119	1996-01-24	1996	1	24	1119	24	Wed	1	N-East	2.35942792892456	1.57741844654083	3.14143705368042	-1.48771750926971	71.1631469726562	88
1120	1996-01-25	1996	1	25	1120	25	Thu	1	N-East	0.761539399623871	-0.372728526592255	1.89580714702606	-2.84527254104614	72.5079727172852	95
1121	1996-01-26	1996	1	26	1121	26	Fri	1	N-East	-0.547904312610626	-2.09180951118469	0.996001064777374	-2.72456526756287	79.6204605102539	89
1122	1996-01-27	1996	1	27	1122	27	Sat	1	N-East	-0.31956934928894	-2.22649073600769	1.5973516702652	-1.18771755695343	87.1040954589844	98
1123	1996-01-28	1996	1	28	1123	28	Sun	1	N-East	1.24225151538849	-0.319882333278656	2.80438542366028	-2.02047085762024	72.3607940673828	82
1124	1996-01-29	1996	1	29	1124	29	Mon	1	N-East	1.30231428146362	0.188052907586098	2.41657567024231	-1.82865917682648	74.8567047119141	97
1125	1996-01-30	1996	1	30	1125	30	Tue	1	N-East	2.05524706840515	1.21628880500793	2.89420557022095	-0.304094165563583	77.3245620727539	96
1126	1996-01-31	1996	1	31	1126	31	Wed	1	N-East	1.75297939777374	0.968056380748749	2.53790259361267	-1.99181163311005	73.6795272827148	107
1127	1996-02-01	1996	2	1	1127	32	Thu	1	N-East	2.04694199562073	1.12852227687836	2.96536183357239	-0.236847594380379	79.9607925415039	103
1128	1996-02-02	1996	2	2	1128	33	Fri	1	N-East	2.53094172477722	1.23048567771912	3.83139753341675	-1.20409417152405	71.4795227050781	82
1129	1996-02-03	1996	2	3	1129	34	Sat	1	N-East	2.48358964920044	0.513862192630768	4.45331716537476	0.416376709938049	83.7871017456055	120
1130	1996-02-04	1996	2	4	1130	35	Sun	1	N-East	2.96121954917908	0.301806181669235	5.62063312530518	-2.07308053970337	70.0649948120117	92
1131	1996-02-05	1996	2	5	1131	36	Mon	1	N-East	-0.857619881629944	-2.5676383972168	0.852398633956909	-4.02221059799194	76.0258026123047	99
1132	1996-02-06	1996	2	6	1132	37	Tue	1	N-East	-1.1622554063797	-2.15756607055664	-0.16694463789463	-4.97134065628052	70.5292816162109	88
1133	1996-02-07	1996	2	7	1133	38	Wed	1	N-East	-1.32960438728333	-2.45952367782593	-0.199685007333755	-2.44503593444824	88.9432907104492	103
1134	1996-02-08	1996	2	8	1134	39	Thu	1	N-East	0.792790114879608	-2.8043315410614	4.4023118019104	-1.70409417152405	78.1081848144531	104
1135	1996-02-09	1996	2	9	1135	40	Fri	1	N-East	1.35016572475433	-1.78967690467834	4.5012731552124	0.736847579479218	88.2064514160156	77
1136	1996-02-10	1996	2	10	1136	41	Sat	1	N-East	4.39423370361328	1.63553905487061	7.1529278755188	2.36550688743591	79.1240539550781	95
1137	1996-02-11	1996	2	11	1137	42	Sun	1	N-East	5.79464912414551	3.51023244857788	8.07906627655029	2.82865929603577	75.3602828979492	115
1138	1996-02-12	1996	2	12	1138	43	Mon	1	N-East	2.28870153427124	-0.152178108692169	4.72958183288574	2.35731840133667	92.3222122192383	87
1139	1996-02-13	1996	2	13	1139	44	Tue	1	N-East	2.6767201423645	0.795250177383423	4.558189868927	0.836847603321075	82.6672439575195	88
1140	1996-02-14	1996	2	14	1140	45	Wed	1	N-East	3.15195751190186	0.61738520860672	5.68653011322021	-2.95905828475952	62.5555801391602	75
1141	1996-02-15	1996	2	15	1141	46	Thu	1	N-East	4.25130748748779	-0.482049912214279	8.98466491699219	2.74503612518311	73.8456497192383	80
1142	1996-02-16	1996	2	16	1142	47	Fri	1	N-East	7.01078462600708	4.94678211212158	9.07478713989258	3.56898641586304	74.2712326049805	81
1143	1996-02-17	1996	2	17	1143	48	Sat	1	N-East	5.8965311050415	3.47982239723206	8.31324005126953	-0.00818835292011499	64.9607925415039	101
1144	1996-02-18	1996	2	18	1144	49	Sun	1	N-East	4.40321636199951	1.27001357078552	7.53641796112061	-0.0631524100899696	69.6684799194336	93
1145	1996-02-19	1996	2	19	1145	50	Mon	1	N-East	0.472800314426422	-1.57866239547729	2.52426314353943	-3.47543501853943	79.0058364868164	100
1146	1996-02-20	1996	2	20	1146	51	Tue	1	N-East	1.16093218326569	-1.65703678131104	3.97890114784241	-6.37717485427856	52.1527137756348	86
1147	1996-02-21	1996	2	21	1147	52	Wed	1	N-East	0.272028416395187	-3.57123899459839	4.11529636383057	-5.96724653244019	62.4304008483887	99
1148	1996-02-22	1996	2	22	1148	53	Thu	1	N-East	3.08712697029114	-0.67492139339447	6.84917497634888	-0.200000002980232	72.8567047119141	105
1149	1996-02-23	1996	2	23	1149	54	Fri	1	N-East	2.83547401428223	0.307509273290634	5.36343908309937	0.0614126473665237	75.7743072509766	72
1150	1996-02-24	1996	2	24	1150	55	Sat	1	N-East	5.38044452667236	3.05262160301208	7.70826816558838	3.2286593914032	80.9766616821289	100
1151	1996-02-25	1996	2	25	1151	56	Sun	1	N-East	2.79550170898438	0.538788795471191	5.05221462249756	-3.49764537811279	59.0527153015137	77
1152	1996-02-26	1996	2	26	1152	57	Mon	1	N-East	2.08595895767212	-2.17792081832886	6.34983968734741	-2.19590592384338	70.7385864257812	92
1153	1996-02-27	1996	2	27	1153	58	Tue	1	N-East	4.00149059295654	-0.533078789710999	8.53605937957764	-0.846775710582733	66.0626373291016	87
1154	1996-02-28	1996	2	28	1154	59	Wed	1	N-East	3.47985029220581	-2.72175455093384	9.68145561218262	-1.84677565097809	62.7269172668457	92
1155	1996-02-29	1996	2	29	1155	60	Thu	1	N-East	6.45064783096313	0.661863803863525	12.2394323348999	2.04094171524048	69.7918167114258	78
1156	1996-03-01	1996	3	1	1156	61	Fri	1	N-East	5.54108047485352	1.86880397796631	9.21335792541504	0.732753396034241	67.5327529907227	78
1157	1996-03-02	1996	3	2	1157	62	Sat	1	N-East	6.96424102783203	5.40393686294556	8.52454662322998	3.89590620994568	80.0976409912109	90
1158	1996-03-03	1996	3	3	1158	63	Sun	1	N-East	5.9832558631897	5.05657339096069	6.90993785858154	5.70409393310547	94.6754379272461	87
1159	1996-03-04	1996	3	4	1159	64	Mon	1	N-East	5.91043615341187	4.84567975997925	6.97519254684448	2.21228241920471	72.9286651611328	78
1160	1996-03-05	1996	3	5	1160	65	Tue	1	N-East	5.99895286560059	4.75425672531128	7.24364852905273	1.02456510066986	67.2865905761719	88
1161	1996-03-06	1996	3	6	1161	66	Wed	1	N-East	6.50819969177246	3.58333611488342	9.43306350708008	3.64503574371338	78.871955871582	93
1162	1996-03-07	1996	3	7	1162	67	Thu	1	N-East	5.8148307800293	3.28133916854858	8.34832286834717	1.89416599273682	73.9936599731445	78
1163	1996-03-08	1996	3	8	1163	68	Fri	1	N-East	2.5762460231781	1.66740202903748	3.48508977890015	-0.875434875488281	73.4310150146484	72
1164	1996-03-09	1996	3	9	1164	69	Sat	1	N-East	4.34476757049561	2.18395495414734	6.50558137893677	1.54913020133972	80.5187377929688	83
1165	1996-03-10	1996	3	10	1165	70	Sun	1	N-East	3.46024179458618	0.148227393627167	6.77225637435913	2.40409421920776	84.6163787841797	67
1166	1996-03-11	1996	3	11	1166	71	Mon	1	N-East	1.00156855583191	-0.680037379264832	2.6831750869751	-0.763152420520782	81.8269195556641	57
1167	1996-03-12	1996	3	12	1167	72	Tue	1	N-East	-0.417855381965637	-1.60251104831696	0.766800343990326	-3.44677567481995	76.6538391113281	82
1168	1996-03-13	1996	3	13	1168	73	Wed	1	N-East	-0.166943818330765	-1.45012521743774	1.11623764038086	-4.01194190979004	63.9109878540039	91
1169	1996-03-14	1996	3	14	1169	74	Thu	1	N-East	0.551882922649384	-0.98076593875885	2.08453154563904	-3.5426812171936	69.5094146728516	106
1170	1996-03-15	1996	3	15	1170	75	Fri	1	N-East	1.73618733882904	0.599975943565369	2.872398853302	-0.875434875488281	76.0146408081055	90
1171	1996-03-16	1996	3	16	1171	76	Sat	1	N-East	2.20442271232605	1.46025264263153	2.9485924243927	0.904094159603119	86.3040924072266	93
1172	1996-03-17	1996	3	17	1172	77	Sun	1	N-East	2.22943592071533	1.43218624591827	3.02668523788452	1.97952914237976	94.4403305053711	84
1173	1996-03-18	1996	3	18	1173	78	Mon	1	N-East	3.00218653678894	1.8067524433136	4.19762086868286	2.49590587615967	92.3000030517578	84
1174	1996-03-19	1996	3	19	1174	79	Tue	1	N-East	2.63775825500488	1.70525717735291	3.57025909423828	2.17134070396423	94.4648971557617	84
1175	1996-03-20	1996	3	20	1175	80	Wed	1	N-East	2.54676485061646	1.14445054531097	3.94907903671265	-0.0836232975125313	80.491813659668	85
1176	1996-03-21	1996	3	21	1176	81	Thu	1	N-East	3.31523060798645	2.09028029441833	4.54018068313599	2.40000009536743	86.7163772583008	79
1177	1996-03-22	1996	3	22	1177	82	Fri	1	N-East	2.83554768562317	1.66999220848083	4.00110340118408	1.17543494701385	89.5239562988281	83
1178	1996-03-23	1996	3	23	1178	83	Sat	1	N-East	3.4833722114563	2.11952590942383	4.84721803665161	3.6040940284729	95.424560546875	104
1179	1996-03-24	1996	3	24	1179	84	Sun	1	N-East	3.99485039710999	2.85880637168884	5.13089466094971	1.21637666225433	79.5514907836914	91
1180	1996-03-25	1996	3	25	1180	85	Mon	1	N-East	3.31145668029785	2.14547824859619	4.47743558883667	1.60818839073181	90.6877136230469	88
1181	1996-03-26	1996	3	26	1181	86	Tue	1	N-East	3.62466502189636	1.76476716995239	5.48456239700317	-0.653224289417267	76.7209777832031	78
1182	1996-03-27	1996	3	27	1182	87	Wed	1	N-East	3.32980823516846	0.642875075340271	6.01674127578735	-5.89999961853027	47.3877182006836	86
1183	1996-03-28	1996	3	28	1183	88	Thu	1	N-East	4.37622213363647	1.17759549617767	7.57484912872314	-1.83275330066681	62.3215942382812	94
1184	1996-03-29	1996	3	29	1184	89	Fri	1	N-East	3.6965970993042	0.758491694927216	6.63470315933228	-2.0017397403717	62.2216987609863	78
1185	1996-03-30	1996	3	30	1185	90	Sat	1	N-East	2.23588705062866	-0.558126151561737	5.02990102767944	-1.06724655628204	69.5187301635742	81
1186	1996-03-31	1996	3	31	1186	91	Sun	1	N-East	3.86613512039185	1.30067574977875	6.43773365020752	-2.01402235031128	64.537467956543	62
1187	1996-04-01	1996	4	1	1187	92	Mon	1	N-East	2.40884160995483	-1.97424638271332	6.79192972183228	-2.72221064567566	62.6275329589844	88
1188	1996-04-02	1996	4	2	1188	93	Tue	1	N-East	3.88249087333679	-1.30341398715973	9.06839656829834	-3.33039879798889	54.0210838317871	72
1189	1996-04-03	1996	4	3	1189	94	Wed	1	N-East	5.38521480560303	0.659270286560059	10.1111602783203	0.261412650346756	60.3591613769531	71
1190	1996-04-04	1996	4	4	1190	95	Thu	1	N-East	4.76414108276367	-0.466647088527679	9.99493026733398	-4.55844354629517	48.7562942504883	73
1191	1996-04-05	1996	4	5	1191	96	Fri	1	N-East	3.32694959640503	-2.1942720413208	8.84817123413086	-0.601739704608917	62.7568092346191	83
1192	1996-04-06	1996	4	6	1192	97	Sat	1	N-East	3.20639491081238	-0.0552928000688553	6.46808338165283	2.424565076828	82.8310089111328	87
1193	1996-04-07	1996	4	7	1193	98	Sun	1	N-East	6.94424533843994	3.81804513931274	10.0704441070557	3.24503612518311	73.9673614501953	89
1194	1996-04-08	1996	4	8	1194	99	Mon	1	N-East	8.15132427215576	2.9048011302948	13.3978481292725	4.94094181060791	66.6930465698242	82
1195	1996-04-09	1996	4	9	1195	100	Tue	1	N-East	12.0446434020996	7.14226007461548	16.9470252990723	7.7081880569458	73.3316268920898	86
1196	1996-04-10	1996	4	10	1196	101	Wed	1	N-East	10.6645412445068	8.65016555786133	12.6789169311523	7.35905790328979	76.9831085205078	80
1197	1996-04-11	1996	4	11	1197	102	Thu	1	N-East	6.49211406707764	4.93001985549927	8.05420875549316	5.28362369537354	96.7122802734375	91
1198	1996-04-12	1996	4	12	1198	103	Fri	1	N-East	3.02555322647095	1.6450629234314	4.4060435295105	-2.65496420860291	64.2497482299805	75
1199	1996-04-13	1996	4	13	1199	104	Sat	1	N-East	3.38436913490295	0.516131222248077	6.25875377655029	-2.84268164634705	60.2456474304199	84
1200	1996-04-14	1996	4	14	1200	105	Sun	1	N-East	4.73820352554321	0.645603775978088	8.842453956604	1.75322425365448	76.6544570922852	74
1201	1996-04-15	1996	4	15	1201	106	Mon	1	N-East	9.90527820587158	4.88048124313354	14.9300775527954	6.62865924835205	68.4193420410156	91
1202	1996-04-16	1996	4	16	1202	107	Tue	1	N-East	11.8329877853394	9.77733421325684	13.8886404037476	9.07134056091309	74.3854675292969	85
1203	1996-04-17	1996	4	17	1203	108	Wed	1	N-East	10.6309432983398	8.35708332061768	12.904803276062	5.15322399139404	65.4574203491211	78
1204	1996-04-18	1996	4	18	1204	109	Thu	1	N-East	8.43042945861816	5.62464809417725	11.2362098693848	3.84094190597534	68.2023544311523	69
1205	1996-04-19	1996	4	19	1205	110	Fri	1	N-East	10.5445537567139	6.30065393447876	14.7884540557861	3.14503574371338	53.1736946105957	72
1206	1996-04-20	1996	4	20	1206	111	Sat	1	N-East	10.0332736968994	6.69482374191284	13.3718614578247	7.66315269470215	86.4924240112305	71
1207	1996-04-21	1996	4	21	1207	112	Sun	1	N-East	10.0612812042236	5.09455347061157	15.0847206115723	8.50583457946777	94.1924285888672	86
1208	1996-04-22	1996	4	22	1208	113	Mon	1	N-East	10.1547574996948	6.6292576789856	13.6802558898926	2.32691955566406	48.1679649353027	81
1209	1996-04-23	1996	4	23	1209	114	Tue	1	N-East	8.83489036560059	5.81360960006714	11.8561725616455	4.35731887817383	77.1012268066406	71
1210	1996-04-24	1996	4	24	1210	115	Wed	1	N-East	9.40512752532959	6.87639379501343	11.9338598251343	3.9573187828064	62.2006149291992	66
1211	1996-04-25	1996	4	25	1211	116	Thu	1	N-East	9.75735473632812	6.48492097854614	13.0297889709473	3.40644860267639	60.2690887451172	80
1212	1996-04-26	1996	4	26	1212	117	Fri	1	N-East	12.817608833313	9.89243602752686	15.7427806854248	7.66141319274902	65.1398162841797	95
1213	1996-04-27	1996	4	27	1213	118	Sat	1	N-East	10.3069362640381	7.66871547698975	12.9451580047607	2.72047090530396	54.9450340270996	80
1214	1996-04-28	1996	4	28	1214	119	Sun	1	N-East	7.41028308868408	5.0677056312561	9.7528600692749	0.971340715885162	68.2420654296875	74
1215	1996-04-29	1996	4	29	1215	120	Mon	1	N-East	7.6159086227417	4.25494909286499	10.9768686294556	2.56960082054138	66.8462677001953	94
1216	1996-04-30	1996	4	30	1216	121	Tue	1	N-East	6.57149934768677	4.80579233169556	8.33720684051514	3.30818819999695	78.726921081543	70
1217	1996-05-01	1996	5	1	1217	122	Wed	1	N-East	5.65384101867676	4.63232374191284	6.67535877227783	4.14268159866333	88.8256912231445	70
1218	1996-05-02	1996	5	2	1218	123	Thu	1	N-East	5.38525533676147	3.56083989143372	7.2096700668335	-0.359058231115341	65.3736953735352	78
1219	1996-05-03	1996	5	3	1219	124	Fri	1	N-East	5.04837989807129	1.7340235710144	8.36273670196533	-1.86079800128937	56.7451400756836	73
1220	1996-05-04	1996	5	4	1220	125	Sat	1	N-East	5.02225732803345	0.448702037334442	9.59581279754639	-3.39355158805847	48.5234413146973	83
1221	1996-05-05	1996	5	5	1221	126	Sun	1	N-East	6.93558788299561	0.93151867389679	12.9396572113037	-1.24851548671722	45.069091796875	76
1222	1996-05-06	1996	5	6	1222	127	Mon	1	N-East	7.41151428222656	3.64567422866821	11.1773538589478	4.08597755432129	75.2345962524414	98
1223	1996-05-07	1996	5	7	1223	128	Tue	1	N-East	7.05605030059814	5.04447841644287	9.0676212310791	2.70000004768372	74.0362243652344	70
1224	1996-05-08	1996	5	8	1224	129	Wed	1	N-East	5.70517110824585	0.281190752983093	11.1291522979736	2.86960101127625	67.7930374145508	69
1225	1996-05-09	1996	5	9	1225	130	Thu	1	N-East	5.36239051818848	1.94885087013245	8.7759313583374	-2.03213882446289	54.028148651123	74
1226	1996-05-10	1996	5	10	1226	131	Fri	1	N-East	6.04178094863892	2.87484431266785	9.20871734619141	-0.27308052778244	60.9240531921387	76
1227	1996-05-11	1996	5	11	1227	132	Sat	1	N-East	5.01114892959595	3.17459487915039	6.84770154953003	4.42047119140625	90.6491317749023	74
1228	1996-05-12	1996	5	12	1228	133	Sun	1	N-East	7.09383344650269	4.86299276351929	9.32467555999756	5.80409383773804	93.7450332641602	82
1229	1996-05-13	1996	5	13	1229	134	Mon	1	N-East	9.35353946685791	4.08129739761353	14.6257839202881	4.62047100067139	60.882495880127	93
1230	1996-05-14	1996	5	14	1230	135	Tue	1	N-East	9.54402256011963	3.45830345153809	15.6297435760498	2.35148453712463	49.2498474121094	85
1231	1996-05-15	1996	5	15	1231	136	Wed	1	N-East	8.36587619781494	5.86720609664917	10.8645477294922	-1.07717478275299	55.3930435180664	81
1232	1996-05-16	1996	5	16	1232	137	Thu	1	N-East	5.77535057067871	2.9528911113739	8.59780979156494	0.669601023197174	66.537467956543	82
1233	1996-05-17	1996	5	17	1233	138	Fri	1	N-East	5.12473726272583	1.62539374828339	8.62408065795898	0.614636898040771	65.9749221801758	75
1234	1996-05-18	1996	5	18	1234	139	Sat	1	N-East	5.37424898147583	1.04685866832733	9.70163917541504	1.61873126029968	67.1328582763672	82
1235	1996-05-19	1996	5	19	1235	140	Sun	1	N-East	8.9984712600708	4.96250057220459	13.0344409942627	4.32282495498657	73.8434066772461	68
1236	1996-05-20	1996	5	20	1236	141	Mon	1	N-East	9.46648788452148	5.9227294921875	13.0102453231812	0.922825276851654	52.1135139465332	77
1237	1996-05-21	1996	5	21	1237	142	Tue	1	N-East	9.86314964294434	5.26121664047241	14.4650831222534	0.721085488796234	45.3744125366211	74
1238	1996-05-22	1996	5	22	1238	143	Wed	1	N-East	7.99539470672607	3.70233583450317	12.2884540557861	7.3040943145752	78.3731842041016	63
1239	1996-05-23	1996	5	23	1239	144	Thu	1	N-East	11.42209815979	8.56121444702148	14.2829809188843	2.88188362121582	50.7743072509766	68
1240	1996-05-24	1996	5	24	1240	145	Fri	1	N-East	12.2494649887085	8.64475727081299	15.8541736602783	3.62456488609314	52.6795310974121	72
1241	1996-05-25	1996	5	25	1241	146	Sat	1	N-East	10.9718418121338	7.21199560165405	14.731689453125	3.76550698280334	52.6702194213867	87
1242	1996-05-26	1996	5	26	1242	147	Sun	1	N-East	9.75042247772217	5.905442237854	13.5954008102417	6.67543458938599	71.0269241333008	86
1243	1996-05-27	1996	5	27	1243	148	Mon	1	N-East	10.5283222198486	7.44687604904175	13.6097679138184	4.58771753311157	68.8918151855469	87
1244	1996-05-28	1996	5	28	1244	149	Tue	1	N-East	9.7162618637085	4.36900949478149	15.0635137557983	6.65322399139404	69.007682800293	79
1245	1996-05-29	1996	5	29	1245	150	Wed	1	N-East	14.3424959182739	10.9330368041992	17.7519588470459	9.09590625762939	65.1620254516602	92
1246	1996-05-30	1996	5	30	1246	151	Thu	1	N-East	14.7551555633545	9.2565975189209	20.2537136077881	11.0672464370728	83.6854705810547	72
1247	1996-05-31	1996	5	31	1247	152	Fri	1	N-East	13.5486612319946	9.86747074127197	17.229850769043	2.03275346755981	45.4637641906738	86
1248	1996-06-01	1996	6	1	1248	153	Sat	1	N-East	10.8788118362427	7.40437078475952	14.353253364563	2.70235443115234	48.8889465332031	84
1249	1996-06-02	1996	6	2	1249	154	Sun	1	N-East	11.2903680801392	6.74529790878296	15.8354377746582	5.91637659072876	62.5848541259766	73
1250	1996-06-03	1996	6	3	1250	155	Mon	1	N-East	10.2472648620605	5.49293661117554	15.0015935897827	6.2696008682251	65.0486221313477	85
1251	1996-06-04	1996	6	4	1251	156	Tue	1	N-East	13.3818235397339	8.85019302368164	17.9134540557861	5.36141300201416	48.3702163696289	76
1252	1996-06-05	1996	6	5	1252	157	Wed	1	N-East	14.2037801742554	8.16914463043213	20.2384147644043	9.58771705627441	58.7684745788574	92
1253	1996-06-06	1996	6	6	1253	158	Thu	1	N-East	15.7825546264648	11.7577123641968	19.8073978424072	8.16141319274902	60.2708282470703	96
1254	1996-06-07	1996	6	7	1254	159	Fri	1	N-East	15.7263412475586	9.91385269165039	21.5388336181641	11.1547546386719	64.6448822021484	77
1255	1996-06-08	1996	6	8	1255	160	Sat	1	N-East	14.5720653533936	9.63726902008057	19.5068626403809	4.96376752853394	46.9229278564453	65
1256	1996-06-09	1996	6	9	1256	161	Sun	1	N-East	13.6392002105713	6.44042301177979	20.8379783630371	3.67195534706116	40.5756454467773	82
1257	1996-06-10	1996	6	10	1257	162	Mon	1	N-East	15.8408393859863	13.1468267440796	18.5348510742188	10.6163778305054	64.8906860351562	79
1258	1996-06-11	1996	6	11	1258	163	Tue	1	N-East	14.8750791549683	11.7522897720337	17.9978675842285	10.8877172470093	70.8673477172852	82
1259	1996-06-12	1996	6	12	1259	164	Wed	1	N-East	12.4461736679077	8.12383937835693	16.7685089111328	5.7426815032959	54.9075736999512	71
1260	1996-06-13	1996	6	13	1260	165	Thu	1	N-East	11.7672634124756	6.67030143737793	16.8642272949219	5.3040943145752	57.1672477722168	69
1261	1996-06-14	1996	6	14	1261	166	Fri	1	N-East	14.265510559082	7.14460372924805	21.386417388916	7.44913053512573	53.1983680725098	70
1262	1996-06-15	1996	6	15	1262	167	Sat	1	N-East	15.1389942169189	9.58257102966309	20.6954174041748	8.65322494506836	55.0591621398926	75
1263	1996-06-16	1996	6	16	1263	168	Sun	1	N-East	16.3399486541748	9.35438919067383	23.3255138397217	11.0713405609131	66.0556793212891	83
1264	1996-06-17	1996	6	17	1264	169	Mon	1	N-East	17.3327922821045	13.4247398376465	21.2408447265625	8.14503574371338	57.3269195556641	66
1265	1996-06-18	1996	6	18	1265	170	Tue	1	N-East	12.2057371139526	8.94992542266846	15.4615468978882	5.6040940284729	62.5409393310547	81
1266	1996-06-19	1996	6	19	1266	171	Wed	1	N-East	11.2864179611206	9.32763290405273	13.2452030181885	4.46960115432739	63.1456565856934	81
1267	1996-06-20	1996	6	20	1267	172	Thu	1	N-East	9.13143253326416	5.69542980194092	12.5674343109131	4.85496425628662	69.2233352661133	64
1268	1996-06-21	1996	6	21	1268	173	Fri	1	N-East	9.03314876556396	5.39349699020386	12.6727991104126	2.36960101127625	57.102970123291	73
1269	1996-06-22	1996	6	22	1269	174	Sat	1	N-East	11.0797338485718	7.50896739959717	14.6505002975464	4.32456541061401	59.9906883239746	94
1270	1996-06-23	1996	6	23	1270	175	Sun	1	N-East	11.0969715118408	5.42542505264282	16.7685165405273	6.01463651657104	58.9492340087891	74
1271	1996-06-24	1996	6	24	1271	176	Mon	1	N-East	14.6721868515015	10.2446184158325	19.0997562408447	7.78597784042358	55.9936561584473	86
1272	1996-06-25	1996	6	25	1272	177	Tue	1	N-East	15.0253219604492	8.13207530975342	21.9185676574707	10.161413192749	60.5744132995605	71
1273	1996-06-26	1996	6	26	1273	178	Wed	1	N-East	14.3776922225952	11.8341627120972	16.9212207794189	11.3163776397705	82.1146392822266	77
1274	1996-06-27	1996	6	27	1274	179	Thu	1	N-East	14.6162376403809	11.0950679779053	18.1374092102051	8.43510818481445	61.3293762207031	61
1275	1996-06-28	1996	6	28	1275	180	Fri	1	N-East	14.7886734008789	11.7127542495728	17.8645935058594	11.520471572876	74.1579360961914	83
1276	1996-06-29	1996	6	29	1276	181	Sat	1	N-East	13.0654830932617	9.89441776275635	16.2365455627441	8.90818786621094	74.4116668701172	59
1277	1996-06-30	1996	6	30	1277	182	Sun	1	N-East	13.9252281188965	10.1117563247681	17.738697052002	8.42047023773193	65.5859756469727	57
1278	1996-07-01	1996	7	1	1278	183	Mon	1	N-East	11.7005262374878	8.44835758209229	14.952693939209	8.2918119430542	74.8245697021484	85
1279	1996-07-02	1996	7	2	1279	184	Tue	1	N-East	12.2364664077759	9.32463073730469	15.1483020782471	8.53275394439697	77.9643859863281	69
1280	1996-07-03	1996	7	3	1280	185	Wed	1	N-East	13.1976385116577	10.221978187561	16.1732978820801	10.987717628479	85.2848510742188	62
1281	1996-07-04	1996	7	4	1281	186	Thu	1	N-East	12.9721050262451	10.1816339492798	15.7625780105591	7.68188381195068	71.895393371582	66
1282	1996-07-05	1996	7	5	1282	187	Fri	1	N-East	13.3934288024902	10.1820220947266	16.6048355102539	5.88597774505615	60.9421691894531	87
1283	1996-07-06	1996	7	6	1283	188	Sat	1	N-East	12.9000673294067	9.69707107543945	16.1030654907227	5.88188362121582	58.5544509887695	78
1284	1996-07-07	1996	7	7	1284	189	Sun	1	N-East	11.9756917953491	8.20969295501709	15.7416925430298	8.39999961853027	72.3607940673828	70
1285	1996-07-08	1996	7	8	1285	190	Mon	1	N-East	13.5792093276978	9.73651027679443	17.4219036102295	8.05496406555176	68.4672470092773	83
1286	1996-07-09	1996	7	9	1286	191	Tue	1	N-East	15.8165121078491	11.7770290374756	19.8559970855713	12.6040954589844	75.8702163696289	71
1287	1996-07-10	1996	7	10	1287	192	Wed	1	N-East	16.4232921600342	9.94445991516113	22.9021263122559	12.5409412384033	65.817497253418	77
1288	1996-07-11	1996	7	11	1288	193	Thu	1	N-East	18.1693820953369	15.1352672576904	21.2035007476807	11.0859785079956	62.2766647338867	70
1289	1996-07-12	1996	7	12	1289	194	Fri	1	N-East	16.7056274414062	13.6629428863525	19.7483081817627	12.4286594390869	78.6152496337891	70
1290	1996-07-13	1996	7	13	1290	195	Sat	1	N-East	16.7663421630859	12.0187616348267	21.5139255523682	13.1204719543457	68.0678634643555	89
1291	1996-07-14	1996	7	14	1291	196	Sun	1	N-East	16.0936641693115	12.3800058364868	19.8073215484619	6.97369527816772	53.8684768676758	75
1292	1996-07-15	1996	7	15	1292	197	Mon	1	N-East	12.2614908218384	8.14627933502197	16.3767032623291	5.98597764968872	58.1128959655762	65
1293	1996-07-16	1996	7	16	1293	198	Tue	1	N-East	13.4878664016724	8.77692127227783	18.1988124847412	6.76960039138794	58.5889472961426	69
1294	1996-07-17	1996	7	17	1294	199	Wed	1	N-East	14.7210540771484	7.31943416595459	22.122673034668	9.56550693511963	56.5393104553223	67
1295	1996-07-18	1996	7	18	1295	200	Thu	1	N-East	14.239972114563	9.61311817169189	18.8668270111084	10.5	71.0678634643555	79
1296	1996-07-19	1996	7	19	1296	201	Fri	1	N-East	17.4820442199707	10.6686172485352	24.2954711914062	10.56960105896	59.3907928466797	94
1297	1996-07-20	1996	7	20	1297	202	Sat	1	N-East	18.9293041229248	11.7887983322144	26.0698070526123	9.03920078277588	42.6118774414062	71
1298	1996-07-21	1996	7	21	1298	203	Sun	1	N-East	19.6593055725098	12.0772390365601	27.2413749694824	8.08423805236816	36.3668441772461	80
1299	1996-07-22	1996	7	22	1299	204	Mon	1	N-East	20.6041622161865	14.7590818405151	26.4492378234863	11.545036315918	48.4778938293457	85
1300	1996-07-23	1996	7	23	1300	205	Tue	1	N-East	18.4655323028564	13.8309001922607	23.1001644134521	14.1327533721924	74.5404357910156	85
1301	1996-07-24	1996	7	24	1301	206	Wed	1	N-East	13.9507360458374	11.3634252548218	16.5380458831787	7.36550664901733	64.8561935424805	73
1302	1996-07-25	1996	7	25	1302	207	Thu	1	N-East	15.1817073822021	7.48590135574341	22.877513885498	9.99825954437256	58.2521018981934	67
1303	1996-07-26	1996	7	26	1303	208	Fri	1	N-East	17.3778266906738	15.1291799545288	19.6264743804932	12.6122827529907	69.5743179321289	63
1304	1996-07-27	1996	7	27	1304	209	Sat	1	N-East	14.0903558731079	10.3740043640137	17.8067073822021	7.63275337219238	58.7497482299805	78
1305	1996-07-28	1996	7	28	1305	210	Sun	1	N-East	15.708927154541	11.6292905807495	19.7885646820068	6.88014364242554	50.5375671386719	62
1306	1996-07-29	1996	7	29	1306	211	Mon	1	N-East	14.5551156997681	12.560492515564	16.5497398376465	11.661413192749	87.0736999511719	59
1307	1996-07-30	1996	7	30	1307	212	Tue	1	N-East	16.2814846038818	12.7694940567017	19.7934761047363	10.624566078186	64.5514907836914	75
1308	1996-07-31	1996	7	31	1308	213	Wed	1	N-East	14.8679208755493	11.4480409622192	18.2878036499023	5.4573187828064	48.553840637207	76
1309	1996-08-01	1996	8	1	1309	214	Thu	1	N-East	14.1440124511719	11.1295957565308	17.1584300994873	7.8532247543335	60.9029693603516	76
1310	1996-08-02	1996	8	2	1310	215	Fri	1	N-East	13.6674032211304	8.73792457580566	18.5968837738037	8.92047023773193	64.6736907958984	69
1311	1996-08-03	1996	8	3	1311	216	Sat	1	N-East	14.1486282348633	9.2556209564209	19.0416374206543	7.72865915298462	54.6508712768555	61
1312	1996-08-04	1996	8	4	1312	217	Sun	1	N-East	14.226580619812	7.08773517608643	21.365421295166	7.91873121261597	51.6352081298828	78
1313	1996-08-05	1996	8	5	1313	218	Mon	1	N-East	17.0519409179688	10.8795042037964	23.2243766784668	10.6146364212036	58.1610069274902	64
1314	1996-08-06	1996	8	6	1314	219	Tue	1	N-East	14.041524887085	11.0062284469604	17.0768222808838	12.6409425735474	83.3596725463867	65
1315	1996-08-07	1996	8	7	1315	220	Wed	1	N-East	16.117223739624	13.400767326355	18.8336791992188	12.9614124298096	76.834602355957	73
1316	1996-08-08	1996	8	8	1316	221	Thu	1	N-East	15.4268217086792	12.06236743927	18.7912750244141	11.8368482589722	68.3164749145508	75
1317	1996-08-09	1996	8	9	1317	222	Fri	1	N-East	16.1586971282959	12.2397108078003	20.0776824951172	11.4655065536499	65.4843368530273	75
1318	1996-08-10	1996	8	10	1318	223	Sat	1	N-East	16.7155227661133	13.2193002700806	20.2117462158203	13.100001335144	76.1708221435547	88
1319	1996-08-11	1996	8	11	1319	224	Sun	1	N-East	14.9714765548706	10.8202619552612	19.1226940155029	13.045036315918	83.6999969482422	72
1320	1996-08-12	1996	8	12	1320	225	Mon	1	N-East	15.3315582275391	10.2081661224365	20.454948425293	11.198260307312	66.6246719360352	68
1321	1996-08-13	1996	8	13	1321	226	Tue	1	N-East	14.7570018768311	11.743522644043	17.7704811096191	11.5959062576294	80.491813659668	67
1322	1996-08-14	1996	8	14	1322	227	Wed	1	N-East	14.7360334396362	9.84317970275879	19.628885269165	9.44094085693359	66.1269149780273	65
1323	1996-08-15	1996	8	15	1323	228	Thu	1	N-East	16.4373054504395	11.0392990112305	21.8353157043457	10.1023540496826	57.8843460083008	70
1324	1996-08-16	1996	8	16	1324	229	Fri	1	N-East	18.0772914886475	12.8036489486694	23.3509330749512	10.1777896881104	50.8848495483398	63
1325	1996-08-17	1996	8	17	1325	230	Sat	1	N-East	17.2263336181641	11.6059274673462	22.8467407226562	11.4777879714966	62.1919174194336	78
1326	1996-08-18	1996	8	18	1326	231	Sun	1	N-East	21.6574211120605	14.4260950088501	28.8887462615967	9.57195568084717	42.5306091308594	65
1327	1996-08-19	1996	8	19	1327	232	Mon	1	N-East	22.3690872192383	16.7475662231445	27.9906101226807	12.6818838119507	56.6282501220703	63
1328	1996-08-20	1996	8	20	1328	233	Tue	1	N-East	18.0466537475586	13.6966695785522	22.3966426849365	13.9286584854126	70.8573226928711	80
1329	1996-08-21	1996	8	21	1329	234	Wed	1	N-East	18.063060760498	14.3729648590088	21.7531585693359	13.640941619873	73.1018447875977	69
1330	1996-08-22	1996	8	22	1330	235	Thu	1	N-East	15.7737674713135	10.3302011489868	21.2173328399658	10.9696006774902	62.2755393981934	71
1331	1996-08-23	1996	8	23	1331	236	Fri	1	N-East	15.9066305160522	12.9419393539429	18.8713207244873	12.17369556427	73.3515853881836	82
1332	1996-08-24	1996	8	24	1332	237	Sat	1	N-East	14.0336809158325	9.44807720184326	18.6192855834961	9.54329586029053	75.8041915893555	69
1333	1996-08-25	1996	8	25	1333	238	Sun	1	N-East	15.5890035629272	11.6889295578003	19.4890785217285	9.73684787750244	70.2450332641602	63
1334	1996-08-26	1996	8	26	1334	239	Mon	1	N-East	13.8838949203491	9.76544380187988	18.002347946167	9.60644817352295	64.5486221313477	78
1335	1996-08-27	1996	8	27	1335	240	Tue	1	N-East	14.2226810455322	11.0059242248535	17.4394359588623	11.9286594390869	82.7146377563477	70
1336	1996-08-28	1996	8	28	1336	241	Wed	1	N-East	13.9013242721558	11.151572227478	16.6510772705078	11.624566078186	79.166130065918	70
1337	1996-08-29	1996	8	29	1337	242	Thu	1	N-East	14.2260246276855	11.5076446533203	16.944408416748	8.3532247543335	67.6725769042969	66
1338	1996-08-30	1996	8	30	1338	243	Fri	1	N-East	13.4265489578247	10.3407917022705	16.5123062133789	8.16960144042969	66.9684753417969	70
1339	1996-08-31	1996	8	31	1339	244	Sat	1	N-East	13.3266582489014	8.51144218444824	18.1418743133545	5.33684778213501	53.6146392822266	73
1340	1996-09-01	1996	9	1	1340	245	Sun	1	N-East	13.7005996704102	8.7006721496582	18.7005271911621	7.29416608810425	55.8158645629883	78
1341	1996-09-02	1996	9	2	1341	246	Mon	1	N-East	17.058801651001	13.1340818405151	20.9835262298584	15.5081882476807	82.8105392456055	76
1342	1996-09-03	1996	9	3	1342	247	Tue	1	N-East	16.3432788848877	14.486647605896	18.1999111175537	15.2754354476929	93.425178527832	82
1343	1996-09-04	1996	9	4	1343	248	Wed	1	N-East	13.737340927124	11.8583908081055	15.6162891387939	9.6450366973877	75.3520965576172	77
1344	1996-09-05	1996	9	5	1344	249	Thu	1	N-East	13.6030797958374	11.7635641098022	15.4425935745239	8.56550693511963	69.0561904907227	70
1345	1996-09-06	1996	9	6	1345	250	Fri	1	N-East	12.1022987365723	10.5739278793335	13.630669593811	7.12047100067139	70.2105407714844	74
1346	1996-09-07	1996	9	7	1346	251	Sat	1	N-East	12.1338710784912	8.56230163574219	15.6784238815308	6.52456521987915	61.9269180297852	70
1347	1996-09-08	1996	9	8	1347	252	Sun	1	N-East	12.173210144043	8.78675651550293	15.5596628189087	9.54503536224365	76.4637603759766	74
1348	1996-09-09	1996	9	9	1348	253	Mon	1	N-East	11.6410121917725	10.0593404769897	13.2226839065552	7.65731859207153	71.386589050293	62
1349	1996-09-10	1996	9	10	1349	254	Tue	1	N-East	13.5060682296753	10.9160461425781	16.0960903167725	7.45322418212891	66.9128952026367	74
1350	1996-09-11	1996	9	11	1350	255	Wed	1	N-East	13.4118022918701	10.5530462265015	16.2705554962158	9.53684711456299	76.3286590576172	59
1351	1996-09-12	1996	9	12	1351	256	Thu	1	N-East	11.8210897445679	8.75716400146484	14.8850164413452	3.9573187828064	56.2743110656738	89
1352	1996-09-13	1996	9	13	1352	257	Fri	1	N-East	10.9406795501709	7.82297563552856	14.0583820343018	4.55731868743896	60.6006164550781	75
1353	1996-09-14	1996	9	14	1353	258	Sat	1	N-East	11.6144685745239	4.47513246536255	18.7540054321289	6.5	62.5614128112793	77
1354	1996-09-15	1996	9	15	1354	259	Sun	1	N-East	14.208179473877	7.66168069839478	20.7523250579834	9.08597755432129	65.8561935424805	90
1355	1996-09-16	1996	9	16	1355	260	Mon	1	N-East	13.230504989624	5.56754493713379	20.8934669494629	9.01054286956787	67.8369445800781	83
1356	1996-09-17	1996	9	17	1356	261	Tue	1	N-East	12.7272357940674	8.98339080810547	16.471076965332	9.29826068878174	71.4585494995117	73
1357	1996-09-18	1996	9	18	1357	262	Wed	1	N-East	12.5736684799194	10.4137058258057	14.7336320877075	9.53684711456299	75.1818771362305	71
1358	1996-09-19	1996	9	19	1358	263	Thu	1	N-East	12.350227355957	9.88821697235107	14.812237739563	8.15731906890869	68.2374649047852	88
1359	1996-09-20	1996	9	20	1359	264	Fri	1	N-East	12.1807069778442	11.1104698181152	13.2509441375732	6.25322437286377	63.0374603271484	76
1360	1996-09-21	1996	9	21	1360	265	Sat	1	N-East	12.5274705886841	10.2686653137207	14.7810869216919	6.99007225036621	67.1784057617188	79
1361	1996-09-22	1996	9	22	1361	266	Sun	1	N-East	11.4264755249023	9.10657978057861	13.6949977874756	4.14912986755371	56.3023567199707	69
1362	1996-09-23	1996	9	23	1362	267	Mon	1	N-East	11.6088523864746	8.17332077026367	15.0443849563599	5.67369508743286	62.8503608703613	61
1363	1996-09-24	1996	9	24	1363	268	Tue	1	N-East	10.5956497192383	5.96132516860962	15.2299776077271	7.03684759140015	68.7760467529297	82
1364	1996-09-25	1996	9	25	1364	269	Wed	1	N-East	14.263542175293	9.78465557098389	18.7644577026367	8.98188304901123	64.3164749145508	80
1365	1996-09-26	1996	9	26	1365	270	Thu	1	N-East	12.0190734863281	8.68942928314209	15.3487186431885	10.1163768768311	83.6122817993164	88
1366	1996-09-27	1996	9	27	1366	271	Fri	1	N-East	13.5618238449097	10.8600969314575	16.2635517120361	3.79416608810425	52.7561950683594	77
1367	1996-09-28	1996	9	28	1367	272	Sat	1	N-East	13.3110313415527	10.0631284713745	16.5589332580566	5.38188409805298	53.4035835266113	78
1368	1996-09-29	1996	9	29	1368	273	Sun	1	N-East	12.8243703842163	10.3483724594116	15.3003692626953	9.02630424499512	77.8502502441406	74
1369	1996-09-30	1996	9	30	1369	274	Mon	1	N-East	11.3676242828369	8.96405792236328	13.7711915969849	5.71029996871948	61.0802803039551	66
1370	1996-10-01	1996	10	1	1370	275	Tue	1	N-East	10.2309522628784	5.77973985671997	14.6821622848511	4.87778949737549	62.9339790344238	93
1371	1996-10-02	1996	10	2	1371	276	Wed	1	N-East	9.88801765441895	4.78816556930542	14.9878730773926	6.81228256225586	72.318733215332	81
1372	1996-10-03	1996	10	3	1372	277	Thu	1	N-East	12.4468250274658	8.51358032226562	16.3800716400146	10.0877180099487	76.561408996582	74
1373	1996-10-04	1996	10	4	1373	278	Fri	1	N-East	9.47222137451172	6.34324884414673	12.6011943817139	3.72456526756287	58.0210838317871	70
1374	1996-10-05	1996	10	5	1374	279	Sat	1	N-East	9.2020435333252	5.29240942001343	13.1116790771484	2.00409412384033	55.6467781066895	81
1375	1996-10-06	1996	10	6	1375	280	Sun	1	N-East	11.9650545120239	8.65714263916016	15.272967338562	9.04503536224365	74.4637756347656	70
1376	1996-10-07	1996	10	7	1376	281	Mon	1	N-East	14.7697496414185	11.9232501983643	17.6162528991699	10.4245653152466	69.6070709228516	86
1377	1996-10-08	1996	10	8	1377	282	Tue	1	N-East	11.3735380172729	8.07765865325928	14.6694164276123	5.14268159866333	64.5929336547852	94
1378	1996-10-09	1996	10	9	1378	283	Wed	1	N-East	9.59632015228271	5.37865734100342	13.8139848709106	5.18362331390381	64.4894561767578	74
1379	1996-10-10	1996	10	10	1379	284	Thu	1	N-East	8.88308811187744	4.02088785171509	13.745288848877	3.9573187828064	65.1480026245117	75
1380	1996-10-11	1996	10	11	1380	285	Fri	1	N-East	9.79186534881592	6.16487216949463	13.4188585281372	5.02865886688232	64.4900741577148	77
1381	1996-10-12	1996	10	12	1381	286	Sat	1	N-East	12.1954956054688	9.36489009857178	15.02610206604	8.3532247543335	71.107063293457	83
1382	1996-10-13	1996	10	13	1382	287	Sun	1	N-East	14.008885383606	10.5258445739746	17.4919261932373	10.624566078186	80.6790237426758	71
1383	1996-10-14	1996	10	14	1383	288	Mon	1	N-East	12.4826517105103	9.62285423278809	15.3424501419067	11.1081876754761	81.4708251953125	91
1384	1996-10-15	1996	10	15	1384	289	Tue	1	N-East	10.9396047592163	8.03822803497314	13.8409805297852	6.2573184967041	71.3070602416992	77
1385	1996-10-16	1996	10	16	1385	290	Wed	1	N-East	8.67197895050049	5.02636861801147	12.3089790344238	4.66141271591187	69.9520950317383	89
1386	1996-10-17	1996	10	17	1386	291	Thu	1	N-East	8.78332233428955	3.69191741943359	13.8747282028198	3.64913010597229	65.7128982543945	79
1387	1996-10-18	1996	10	18	1387	292	Fri	1	N-East	10.9180564880371	6.80416440963745	15.0319471359253	7.11637687683105	74.4228286743164	80
1388	1996-10-19	1996	10	19	1388	293	Sat	1	N-East	11.2651844024658	9.05189418792725	13.478476524353	4.83275365829468	60.7210845947266	59
1389	1996-10-20	1996	10	20	1389	294	Sun	1	N-East	12.1403064727783	9.14077854156494	15.1398334503174	11.4877185821533	87.9520950317383	74
1390	1996-10-21	1996	10	21	1390	295	Mon	1	N-East	11.8044147491455	8.51190853118896	15.0969209671021	6.56724643707275	69.7502517700195	72
1391	1996-10-22	1996	10	22	1391	296	Tue	1	N-East	10.397970199585	5.8722128868103	14.9237270355225	9.18771743774414	79.3053283691406	89
1392	1996-10-23	1996	10	23	1392	297	Wed	1	N-East	13.0811557769775	10.0690469741821	16.0932674407959	9.52456474304199	76.0357208251953	72
1393	1996-10-24	1996	10	24	1393	298	Thu	1	N-East	11.8686752319336	8.74546813964844	14.9918823242188	9.60000038146973	82.3152465820312	72
1394	1996-10-25	1996	10	25	1394	299	Fri	1	N-East	12.0706405639648	9.25528144836426	14.8859996795654	6.86550664901733	69.6374664306641	87
1395	1996-10-26	1996	10	26	1395	300	Sat	1	N-East	9.7345666885376	7.04950428009033	12.4196300506592	4.37778997421265	68.0275344848633	75
1396	1996-10-27	1996	10	27	1396	301	Sun	1	N-East	11.0122032165527	8.61355495452881	13.410852432251	6.66141271591187	67.2380828857422	80
1397	1996-10-28	1996	10	28	1397	302	Mon	1	N-East	11.9654245376587	9.79643630981445	14.1344146728516	10.8122835159302	87.8087997436523	80
1398	1996-10-29	1996	10	29	1398	303	Tue	1	N-East	7.11048269271851	4.3950138092041	9.82595062255859	-0.783623278141022	54.818733215332	65
1399	1996-10-30	1996	10	30	1399	304	Wed	1	N-East	7.61624336242676	3.63653159141541	11.5959558486938	5.63275289535522	70.590690612793	71
1400	1996-10-31	1996	10	31	1400	305	Thu	1	N-East	11.1349792480469	7.77179670333862	14.4981622695923	9.31228256225586	85.4655075073242	77
1401	1996-11-01	1996	11	1	1401	306	Fri	1	N-East	11.597056388855	7.85008525848389	15.3440275192261	6.44913053512573	67.4298858642578	78
1402	1996-11-02	1996	11	2	1402	307	Sat	1	N-East	13.9044981002808	11.1975936889648	16.6114044189453	9.44913005828857	64.1462707519531	78
1403	1996-11-03	1996	11	3	1403	308	Sun	1	N-East	12.9575862884521	11.065336227417	14.8498373031616	6.46141242980957	61.0725708007812	85
1404	1996-11-04	1996	11	4	1404	309	Mon	1	N-East	10.5273885726929	8.57669639587402	12.4780807495117	4.89416646957397	63.0960121154785	86
1405	1996-11-05	1996	11	5	1405	310	Tue	1	N-East	8.11299705505371	5.74388027191162	10.4821176528931	1.50409424304962	63.6269187927246	77
1406	1996-11-06	1996	11	6	1406	311	Wed	1	N-East	7.88204431533813	4.63277149200439	11.1313180923462	2.32865929603577	58.8275375366211	77
1407	1996-11-07	1996	11	7	1407	312	Thu	1	N-East	4.14705753326416	0.535646438598633	7.75846815109253	-0.520470857620239	71.703483581543	73
1408	1996-11-08	1996	11	8	1408	313	Fri	1	N-East	5.14862060546875	1.18348503112793	9.11375617980957	0.561412632465363	67.6281433105469	80
1409	1996-11-09	1996	11	9	1409	314	Sat	1	N-East	4.91284465789795	2.08740997314453	7.73828029632568	-0.554964065551758	63.0906829833984	80
1410	1996-11-10	1996	11	10	1410	315	Sun	1	N-East	0.37116327881813	-2.55733132362366	3.29965806007385	-0.446775704622269	92.71923828125	61
1411	1996-11-11	1996	11	11	1411	316	Mon	1	N-East	3.61099314689636	-0.819410920143127	8.04139804840088	3.35086965560913	85.5998992919922	65
1412	1996-11-12	1996	11	12	1412	317	Tue	1	N-East	5.50845003128052	3.24429631233215	7.77260255813599	-0.814022243022919	58.4357223510742	78
1413	1996-11-13	1996	11	13	1413	318	Wed	1	N-East	4.23530149459839	1.23425054550171	7.23635292053223	-0.116376705467701	70.8011245727539	58
1414	1996-11-14	1996	11	14	1414	319	Thu	1	N-East	5.79817152023315	1.70344090461731	9.89290237426758	6.44913053512573	87.8608016967773	84
1415	1996-11-15	1996	11	15	1415	320	Fri	1	N-East	8.42273616790771	6.42280864715576	10.4226627349854	7.69590616226196	87.4743041992188	86
1416	1996-11-16	1996	11	16	1416	321	Sat	1	N-East	9.6374397277832	8.0767240524292	11.1981554031372	8.012282371521	86.1070709228516	77
1417	1996-11-17	1996	11	17	1417	322	Sun	1	N-East	5.74380493164062	3.29098153114319	8.19662857055664	2.09590578079224	80.6894607543945	76
1418	1996-11-18	1996	11	18	1418	323	Mon	1	N-East	1.535893201828	-1.70032823085785	4.7721152305603	-4.28771781921387	65.8508682250977	82
1419	1996-11-19	1996	11	19	1419	324	Tue	1	N-East	0.513190388679504	-3.47837209701538	4.50475263595581	-1.90173971652985	65.5053253173828	104
1420	1996-11-20	1996	11	20	1420	325	Wed	1	N-East	2.29589486122131	0.450558543205261	4.14123153686523	-1.26141273975372	77.5537338256836	81
1421	1996-11-21	1996	11	21	1421	326	Thu	1	N-East	1.5223890542984	-1.73986279964447	4.78464126586914	-3.45087003707886	64.0924301147461	80
1422	1996-11-22	1996	11	22	1422	327	Fri	1	N-East	2.0695915222168	-0.117497146129608	4.25667953491211	0.346775710582733	84.3608016967773	71
1423	1996-11-23	1996	11	23	1423	328	Sat	1	N-East	1.46032571792603	-1.65444588661194	4.57509756088257	-1.14503598213196	79.8461608886719	81
1424	1996-11-24	1996	11	24	1424	329	Sun	1	N-East	1.14787638187408	-0.740079998970032	3.03583264350891	-1.16724669933319	85.4392013549805	86
1425	1996-11-25	1996	11	25	1425	330	Mon	1	N-East	3.15428256988525	0.242643296718597	6.06592130661011	2.20818829536438	83.5222091674805	101
1426	1996-11-26	1996	11	26	1426	331	Tue	1	N-East	3.5762791633606	1.68188107013702	5.47067737579346	-0.802354395389557	70.8186264038086	78
1427	1996-11-27	1996	11	27	1427	332	Wed	1	N-East	2.42672085762024	-0.728052735328674	5.58149433135986	1.65496397018433	88.5554733276367	83
1428	1996-11-28	1996	11	28	1428	333	Thu	1	N-East	1.50153815746307	-1.87157499790192	4.8746509552002	-1.363152384758	81.2661209106445	87
1429	1996-11-29	1996	11	29	1429	334	Fri	1	N-East	3.47238945960999	0.248545944690704	6.69623327255249	1.075434923172	76.8280410766602	89
1430	1996-11-30	1996	11	30	1430	335	Sat	1	N-East	5.75927114486694	3.40506482124329	8.11347770690918	3.01637697219849	78.9040985107422	82
1431	1996-12-01	1996	12	1	1431	336	Sun	1	N-East	6.21558046340942	2.1101861000061	10.3209753036499	4.87134075164795	76.7316284179688	94
1432	1996-12-02	1996	12	2	1432	337	Mon	1	N-East	5.31983709335327	3.44511413574219	7.19456005096436	0.867246568202972	68.7297897338867	75
1433	1996-12-03	1996	12	3	1433	338	Tue	1	N-East	4.30974578857422	1.91081857681274	6.70867300033569	3.5	92.3754348754883	85
1434	1996-12-04	1996	12	4	1434	339	Wed	1	N-East	3.29405689239502	1.07488703727722	5.5132269859314	0.704094111919403	73.8146286010742	102
1435	1996-12-05	1996	12	5	1435	340	Thu	1	N-East	3.06226444244385	1.08083522319794	5.04369401931763	0.208188354969025	77.173698425293	95
1436	1996-12-06	1996	12	6	1436	341	Fri	1	N-East	0.444487243890762	-3.18015289306641	4.06912708282471	-1.6204708814621	83.863151550293	84
1437	1996-12-07	1996	12	7	1437	342	Sat	1	N-East	0.515128314495087	-2.86742043495178	3.89767670631409	-0.675434947013855	84.6777877807617	71
1438	1996-12-08	1996	12	8	1438	343	Sun	1	N-East	3.57494306564331	0.717614650726318	6.43227100372314	3.05148458480835	87.235107421875	88
1439	1996-12-09	1996	12	9	1439	344	Mon	1	N-East	3.18931031227112	1.19604420661926	5.18257665634155	2.40644860267639	86.5064544677734	92
1440	1996-12-10	1996	12	10	1440	345	Tue	1	N-East	3.60884308815002	1.86221480369568	5.35547208786011	2.83684754371643	91.0467758178711	90
1441	1996-12-11	1996	12	11	1441	346	Wed	1	N-East	4.6438570022583	3.60296988487244	5.68844842910767	1.34913015365601	73.9210815429688	97
1442	1996-12-12	1996	12	12	1442	347	Thu	1	N-East	3.94249200820923	2.76807737350464	5.12241697311401	2.61402225494385	88.2192459106445	96
1443	1996-12-13	1996	12	13	1443	348	Fri	1	N-East	1.50204873085022	-0.452490270137787	3.45658779144287	-0.712282538414001	83.9181213378906	90
1444	1996-12-14	1996	12	14	1444	349	Sat	1	N-East	3.17188882827759	-2.00216865539551	8.34594631195068	2.00818848609924	74.5947875976562	89
1445	1996-12-15	1996	12	15	1445	350	Sun	1	N-East	6.62852907180786	4.24879741668701	9.00826168060303	4.20174026489258	80.2946701049805	108
1446	1996-12-16	1996	12	16	1446	351	Mon	1	N-East	5.81416082382202	4.64447736740112	6.9838433265686	4.1959056854248	83.2579345703125	107
1447	1996-12-17	1996	12	17	1447	352	Tue	1	N-East	3.17184948921204	0.794705450534821	5.54899406433105	2.3327534198761	86.3047103881836	106
1448	1996-12-18	1996	12	18	1448	353	Wed	1	N-East	4.08961582183838	1.13111519813538	7.0481162071228	5.40409421920776	97.0245666503906	104
1449	1996-12-19	1996	12	19	1449	354	Thu	1	N-East	4.15930795669556	3.27377486228943	5.04484081268311	-0.124565064907074	72.8625335693359	103
1450	1996-12-20	1996	12	20	1450	355	Fri	1	N-East	3.36874079704285	2.57081341743469	4.16666841506958	-3.49590587615967	58.7631530761719	110
1451	1996-12-21	1996	12	21	1451	356	Sat	1	N-East	2.69746255874634	2.1603844165802	3.24068331718445	-3.68362331390381	60.1532211303711	94
1452	1996-12-22	1996	12	22	1452	357	Sun	1	N-East	2.78741407394409	0.228132352232933	5.3246374130249	0.363152414560318	80.7431945800781	97
1453	1996-12-23	1996	12	23	1453	358	Mon	1	N-East	2.65137386322021	1.32199585437775	3.98075175285339	0.608188331127167	81.848518371582	106
1454	1996-12-24	1996	12	24	1454	359	Tue	1	N-East	2.30901980400085	1.24079549312592	3.3772439956665	-4.60992813110352	56.5404319763184	111
1455	1996-12-25	1996	12	25	1455	360	Wed	1	N-East	2.26388216018677	0.0274911541491747	4.50027418136597	2.31637668609619	91.5853576660156	104
1456	1996-12-26	1996	12	26	1456	361	Thu	1	N-East	-0.128276750445366	-1.93394339084625	1.6773898601532	-3.17134070396423	80.7743072509766	106
1457	1996-12-27	1996	12	27	1457	362	Fri	1	N-East	1.45312309265137	-1.57664465904236	4.48289155960083	-0.291811674833298	79.4795303344727	111
1458	1996-12-28	1996	12	28	1458	363	Sat	1	N-East	3.55707502365112	1.42372179031372	5.69042873382568	1.84094166755676	81.0602798461914	115
1459	1996-12-29	1996	12	29	1459	364	Sun	1	N-East	2.10184335708618	-0.153289780020714	4.35697650909424	1.74094176292419	86.6672439575195	122
1460	1996-12-30	1996	12	30	1460	365	Mon	1	N-East	2.28906035423279	0.541260659694672	4.03685998916626	-2.21228241920471	69.2444229125977	114
1461	1996-12-31	1996	12	31	1461	366	Tue	1	N-East	0.344500601291656	-1.05300903320312	1.74201011657715	-2.07952904701233	74.6251831054688	111
1462	1997-01-01	1997	1	1	1462	1	Wed	1	N-East	0.47929260134697	-0.827627122402191	1.78621232509613	-3.86315250396729	66.3006134033203	134
1463	1997-01-02	1997	1	2	1463	2	Thu	1	N-East	0.998650968074799	-0.644401609897614	2.64170360565186	-1.50173985958099	82.9152450561523	113
1464	1997-01-03	1997	1	3	1464	3	Fri	1	N-East	0.9139524102211	-0.895977199077606	2.72388195991516	-2.35086989402771	76.7743072509766	139
1465	1997-01-04	1997	1	4	1465	4	Sat	1	N-East	1.30751371383667	0.0293283518403769	2.5856990814209	-3.62305212020874	61.2899627685547	113
1466	1997-01-05	1997	1	5	1466	5	Sun	1	N-East	2.14009404182434	1.29940962791443	2.98077821731567	-2.08362317085266	72.0859756469727	111
1467	1997-01-06	1997	1	6	1467	6	Mon	1	N-East	2.59391260147095	1.22336804866791	3.96445655822754	1.91637670993805	92.7912063598633	113
1468	1997-01-07	1997	1	7	1468	7	Tue	1	N-East	1.10010528564453	0.511175751686096	1.68903470039368	-2.65087008476257	73.1678619384766	107
1469	1997-01-08	1997	1	8	1469	8	Wed	1	N-East	0.953335642814636	-0.00642348034307361	1.91309463977814	-2.3959059715271	74.2765655517578	114
1470	1997-01-09	1997	1	9	1470	9	Thu	1	N-East	2.13357925415039	0.352047383785248	3.91511082649231	0.683623254299164	85.4222030639648	125
1471	1997-01-10	1997	1	10	1471	10	Fri	1	N-East	0.663989067077637	-0.656057834625244	1.98403608798981	-0.528659224510193	85.1601791381836	103
1472	1997-01-11	1997	1	11	1472	11	Sat	1	N-East	2.18939256668091	-1.91569721698761	6.29448270797729	-0.867246568202972	91.8982543945312	115
1473	1997-01-12	1997	1	12	1473	12	Sun	1	N-East	5.6456823348999	0.190580531954765	11.1007843017578	7.14094209671021	77.3930358886719	121
1474	1997-01-13	1997	1	13	1474	13	Mon	1	N-East	9.56765651702881	8.44098663330078	10.6943264007568	6.84503555297852	76.3947830200195	94
1475	1997-01-14	1997	1	14	1475	14	Tue	1	N-East	7.9936842918396	4.53981685638428	11.4475526809692	-1.31811654567719	49.9714469909668	108
1476	1997-01-15	1997	1	15	1476	15	Wed	1	N-East	6.24265718460083	3.13008737564087	9.35522651672363	5.15322399139404	82.7865905761719	114
1477	1997-01-16	1997	1	16	1477	16	Thu	1	N-East	1.19008159637451	-1.21505057811737	3.59521436691284	0.324565052986145	92.8982620239258	102
1478	1997-01-17	1997	1	17	1478	17	Fri	1	N-East	4.18780183792114	-0.0166950840502977	8.39229965209961	2.22865915298462	92.6982574462891	118
1479	1997-01-18	1997	1	18	1479	18	Sat	1	N-East	4.58818817138672	1.89013409614563	7.28624296188354	4.18771743774414	86.9736938476562	102
1480	1997-01-19	1997	1	19	1480	19	Sun	1	N-East	3.58235859870911	1.55070352554321	5.614013671875	2.80818819999695	97.530403137207	94
1481	1997-01-20	1997	1	20	1481	20	Mon	1	N-East	3.80845785140991	1.14504587650299	6.47186946868896	0.195905819535255	78.0590515136719	114
1482	1997-01-21	1997	1	21	1482	21	Tue	1	N-East	1.14683508872986	-2.69409227371216	4.98776245117188	-1.60409426689148	78.6187362670898	114
1483	1997-01-22	1997	1	22	1483	22	Wed	1	N-East	0.0500898510217667	-1.28246331214905	1.38264286518097	-0.240941777825356	90.9777908325195	89
1484	1997-01-23	1997	1	23	1484	23	Thu	1	N-East	0.694795310497284	-1.48390090465546	2.8734917640686	-1.09826028347015	80.2467727661133	105
1485	1997-01-24	1997	1	24	1485	24	Fri	1	N-East	4.33026933670044	0.729562759399414	7.93097639083862	2.69590592384338	86.2333755493164	89
1486	1997-01-25	1997	1	25	1486	25	Sat	1	N-East	6.42473316192627	3.20468020439148	9.6447868347168	6.25087022781372	87.3883285522461	101
1487	1997-01-26	1997	1	26	1487	26	Sun	1	N-East	4.53958797454834	0.0301757119596004	9.04900074005127	1.26550686359406	75.1550674438477	106
1488	1997-01-27	1997	1	27	1488	27	Mon	1	N-East	4.63340425491333	2.24365425109863	7.02315521240234	3.60818839073181	84.877799987793	125
1489	1997-01-28	1997	1	28	1489	28	Tue	1	N-East	5.00549554824829	1.014275431633	8.9967155456543	-0.0263048242777586	68.3473815917969	97
1490	1997-01-29	1997	1	29	1490	29	Wed	1	N-East	3.22073101997375	-1.3541179895401	7.79557991027832	-0.35086989402771	75.3988647460938	98
1491	1997-01-30	1997	1	30	1491	30	Thu	1	N-East	2.88162112236023	0.622865974903107	5.14037609100342	0.136847585439682	74.4719619750977	85
1492	1997-01-31	1997	1	31	1492	31	Fri	1	N-East	1.36875236034393	-2.26289033889771	5.00039482116699	1.55731856822968	88.4426803588867	98
1493	1997-02-01	1997	2	1	1493	32	Sat	1	N-East	2.96263289451599	0.93830668926239	4.98695945739746	-0.167246595025063	80.2801361083984	89
1494	1997-02-02	1997	2	2	1494	33	Sun	1	N-East	4.6502103805542	1.67104089260101	7.6293797492981	0.846775710582733	68.8297805786133	81
1495	1997-02-03	1997	2	3	1495	34	Mon	1	N-East	3.79158568382263	-0.570798337459564	8.15396881103516	0.320470899343491	74.5169982910156	86
1496	1997-02-04	1997	2	4	1496	35	Tue	1	N-East	4.9170560836792	2.24013543128967	7.59397792816162	4.30000019073486	92.1286544799805	113
1497	1997-02-05	1997	2	5	1497	36	Wed	1	N-East	3.83127021789551	0.231614679098129	7.43092441558838	0.628659248352051	75.9561920166016	106
1498	1997-02-06	1997	2	6	1498	37	Thu	1	N-East	6.70175075531006	2.34692096710205	11.0565795898438	4.62047100067139	77.5006103515625	96
1499	1997-02-07	1997	2	7	1499	38	Fri	1	N-East	6.85953521728516	4.49356889724731	9.22550201416016	-1.93858730792999	57.0872077941895	90
1500	1997-02-08	1997	2	8	1500	39	Sat	1	N-East	5.52248668670654	2.8981716632843	8.14680099487305	2.35086989402771	76.817497253418	98
1501	1997-02-09	1997	2	9	1501	40	Sun	1	N-East	7.74619722366333	5.10296535491943	10.3894300460815	3.02456521987915	66.1128921508789	79
1502	1997-02-10	1997	2	10	1502	41	Mon	1	N-East	6.90346240997314	3.82122921943665	9.98569583892822	3.77134084701538	81.4052200317383	96
1503	1997-02-11	1997	2	11	1503	42	Tue	1	N-East	5.30968999862671	1.67688548564911	8.94249439239502	0.461412638425827	61.7035827636719	105
1504	1997-02-12	1997	2	12	1504	43	Wed	1	N-East	8.43336009979248	5.31393003463745	11.5527906417847	7.10818862915039	84.8316345214844	98
1505	1997-02-13	1997	2	13	1505	44	Thu	1	N-East	5.94174146652222	3.72937083244324	8.15411186218262	1.41228258609772	69.8222122192383	98
1506	1997-02-14	1997	2	14	1506	45	Fri	1	N-East	4.4247407913208	1.57340097427368	7.27608108520508	-1.424565076828	64.4198532104492	84
1507	1997-02-15	1997	2	15	1507	46	Sat	1	N-East	5.28670120239258	2.01905512809753	8.55434513092041	-0.412282526493073	65.94677734375	84
1508	1997-02-16	1997	2	16	1508	47	Sun	1	N-East	5.22215032577515	2.68904185295105	7.75525856018066	2.30818843841553	83.1385879516602	86
1509	1997-02-17	1997	2	17	1509	48	Mon	1	N-East	7.21712493896484	3.90002131462097	10.5342292785645	4.91637706756592	82.7310104370117	84
1510	1997-02-18	1997	2	18	1510	49	Tue	1	N-East	4.64247846603394	1.22416365146637	8.06079387664795	0.275434941053391	73.8970260620117	106
1511	1997-02-19	1997	2	19	1511	50	Wed	1	N-East	5.71827268600464	1.32262468338013	10.1139211654663	3.43275332450867	84.0596694946289	87
1512	1997-02-20	1997	2	20	1512	51	Thu	1	N-East	5.80616998672485	2.48062586784363	9.13171482086182	2.27369499206543	66.9053268432617	69
1513	1997-02-21	1997	2	21	1513	52	Fri	1	N-East	7.86844921112061	5.48375797271729	10.2531404495239	0.168622031807899	59.5076637268066	98
1514	1997-02-22	1997	2	22	1514	53	Sat	1	N-East	8.64874744415283	6.3819317817688	10.9155616760254	4.53275299072266	66.0286636352539	83
1515	1997-02-23	1997	2	23	1515	54	Sun	1	N-East	8.94383907318115	6.12691164016724	11.7607650756836	3.93275356292725	65.0579376220703	89
1516	1997-02-24	1997	2	24	1516	55	Mon	1	N-East	5.83628177642822	3.61151146888733	8.06105136871338	-0.16141265630722	60.6748199462891	100
1517	1997-02-25	1997	2	25	1517	56	Tue	1	N-East	5.76022720336914	2.19409537315369	9.32635974884033	1.25905823707581	60.3426818847656	92
1518	1997-02-26	1997	2	26	1518	57	Wed	1	N-East	4.07441377639771	2.45303177833557	5.69579553604126	2.62140679359436	87.4750671386719	70
1519	1997-02-27	1997	2	27	1519	58	Thu	1	N-East	6.3855996131897	2.73576045036316	10.0354375839233	2.79590559005737	77.2579345703125	73
1520	1997-02-28	1997	2	28	1520	59	Fri	1	N-East	8.17467212677002	5.18592977523804	11.1634130477905	-0.297645628452301	49.0363349914551	88
1521	1997-03-01	1997	3	1	1521	60	Sat	1	N-East	8.09532642364502	4.87503671646118	11.3156156539917	2.37369513511658	60.0585479736328	79
1522	1997-03-02	1997	3	2	1522	61	Sun	1	N-East	7.51403427124023	5.12390089035034	9.90416812896729	-3.13039898872375	47.3316268920898	89
1523	1997-03-03	1997	3	3	1523	62	Mon	1	N-East	5.90783452987671	3.0137050151825	8.80196285247803	-0.775434970855713	59.9327583312988	111
1524	1997-03-04	1997	3	4	1524	63	Tue	1	N-East	3.45277857780457	-2.37423038482666	9.27978801727295	-0.309928119182587	69.728141784668	87
1525	1997-03-05	1997	3	5	1525	64	Wed	1	N-East	6.86655855178833	3.31188225746155	10.4212322235107	3.31228232383728	66.8702087402344	93
1526	1997-03-06	1997	3	6	1526	65	Thu	1	N-East	4.61471128463745	0.0672201216220856	9.16220378875732	-1.49355149269104	58.3544540405273	82
1527	1997-03-07	1997	3	7	1527	66	Fri	1	N-East	8.66059303283691	4.17560434341431	13.1455812454224	5.80000019073486	68.9275360107422	95
1528	1997-03-08	1997	3	8	1528	67	Sat	1	N-East	6.66570138931274	2.90073657035828	10.4306650161743	0.812282562255859	65.0818786621094	90
1529	1997-03-09	1997	3	9	1529	68	Sun	1	N-East	5.69911098480225	1.55232977867126	9.84589099884033	3.62047076225281	79.334587097168	81
1530	1997-03-10	1997	3	10	1530	69	Mon	1	N-East	7.33792638778687	3.0190155506134	11.6568384170532	4.42047119140625	71.5333709716797	100
1531	1997-03-11	1997	3	11	1531	70	Tue	1	N-East	6.83832550048828	1.31699287891388	12.3596591949463	4.31637668609619	85.8959121704102	87
1532	1997-03-12	1997	3	12	1532	71	Wed	1	N-East	8.17117691040039	3.01976847648621	13.3225860595703	6.29590606689453	78.5409469604492	73
1533	1997-03-13	1997	3	13	1533	72	Thu	1	N-East	8.86950969696045	6.11022710800171	11.628791809082	5.32456541061401	69.833366394043	91
1534	1997-03-14	1997	3	14	1534	73	Fri	1	N-East	10.6578874588013	8.04418849945068	13.2715873718262	6.59590578079224	72.6198577880859	78
1535	1997-03-15	1997	3	15	1535	74	Sat	1	N-East	11.2411308288574	8.61416244506836	13.8681020736694	8.78771781921387	78.0854644775391	80
1536	1997-03-16	1997	3	16	1536	75	Sun	1	N-East	10.5472965240479	8.45474624633789	12.6398468017578	7.43684768676758	77.6596755981445	74
1537	1997-03-17	1997	3	17	1537	76	Mon	1	N-East	11.0488967895508	8.763427734375	13.3343648910522	8.32630443572998	81.9006042480469	79
1538	1997-03-18	1997	3	18	1538	77	Tue	1	N-East	9.49613952636719	7.96013593673706	11.0321445465088	3.84094190597534	68.1596755981445	77
1539	1997-03-19	1997	3	19	1539	78	Wed	1	N-East	8.14852905273438	5.33990049362183	10.9571580886841	2.15322422981262	66.1053237915039	85
1540	1997-03-20	1997	3	20	1540	79	Thu	1	N-East	7.40676355361938	2.82879877090454	11.9847278594971	2.01228260993958	65.0327529907227	75
1541	1997-03-21	1997	3	21	1541	80	Fri	1	N-East	4.40841245651245	0.416306227445602	8.40051937103271	-1.45496416091919	59.2824974060059	77
1542	1997-03-22	1997	3	22	1542	81	Sat	1	N-East	7.43297672271729	2.61665964126587	12.2492942810059	1.94094181060791	64.3532257080078	72
1543	1997-03-23	1997	3	23	1543	82	Sun	1	N-East	8.28383827209473	5.63344383239746	10.9342317581177	4.15322399139404	73.1462631225586	65
1544	1997-03-24	1997	3	24	1544	83	Mon	1	N-East	8.3944149017334	5.43233823776245	11.3564910888672	6.30000019073486	88.2251815795898	87
1545	1997-03-25	1997	3	25	1545	84	Tue	1	N-East	8.77962779998779	4.95394039154053	12.6053152084351	5.36550712585449	70.4199600219727	81
1546	1997-03-26	1997	3	26	1546	85	Wed	1	N-East	11.1176338195801	7.90428066253662	14.3309888839722	4.31228256225586	61.4392013549805	73
1547	1997-03-27	1997	3	27	1547	86	Thu	1	N-East	8.44927310943604	5.63919115066528	11.2593555450439	1.81637668609619	61.3655052185059	76
1548	1997-03-28	1997	3	28	1548	87	Fri	1	N-East	7.1299409866333	3.28759527206421	10.9722862243652	-1.72456502914429	50.5894584655762	92
1549	1997-03-29	1997	3	29	1549	88	Sat	1	N-East	8.75969791412354	4.32944536209106	13.1899499893188	2.138587474823	59.2438087463379	79
1550	1997-03-30	1997	3	30	1550	89	Sun	1	N-East	7.9622483253479	4.25460195541382	11.6698970794678	0.445035934448242	53.7245674133301	75
1551	1997-03-31	1997	3	31	1551	90	Mon	1	N-East	8.13648414611816	3.13361120223999	13.1427249908447	2.424565076828	55.8269233703613	83
1552	1997-04-01	1997	4	1	1552	91	Tue	1	N-East	9.70600986480713	5.76003646850586	13.6519842147827	4.8959059715271	62.2385864257812	76
1553	1997-04-02	1997	4	2	1553	92	Wed	1	N-East	9.32350730895996	4.55345010757446	14.0935649871826	3.5	56.8532257080078	71
1554	1997-04-03	1997	4	3	1554	93	Thu	1	N-East	7.07085180282593	3.57818722724915	10.563515663147	-2.63275337219238	46.9444198608398	72
1555	1997-04-04	1997	4	4	1555	94	Fri	1	N-East	5.19796323776245	-0.70199179649353	11.097918510437	-0.875434875488281	65.5719528198242	89
1556	1997-04-05	1997	4	5	1556	95	Sat	1	N-East	9.23117351531982	4.4133152961731	14.049033164978	8.2795295715332	76.4882202148438	83
1557	1997-04-06	1997	4	6	1557	96	Sun	1	N-East	6.97159242630005	4.29096174240112	9.65222358703613	4.08771753311157	75.7473907470703	87
1558	1997-04-07	1997	4	7	1558	97	Mon	1	N-East	10.2909622192383	6.40120315551758	14.1807231903076	7.46141242980957	74.1333694458008	80
1559	1997-04-08	1997	4	8	1559	98	Tue	1	N-East	11.2364149093628	7.10738849639893	15.3654403686523	3.60235452651978	52.2439155578613	89
1560	1997-04-09	1997	4	9	1560	99	Wed	1	N-East	9.92674255371094	4.086585521698	15.766900062561	4.46960115432739	60.1328582763672	82
1561	1997-04-10	1997	4	10	1561	100	Thu	1	N-East	9.73629570007324	2.70229244232178	16.770299911499	4.72865867614746	60.5842399597168	72
1562	1997-04-11	1997	4	11	1562	101	Fri	1	N-East	8.02282524108887	5.23304557800293	10.8126087188721	0.665506899356842	58.6486167907715	85
1563	1997-04-12	1997	4	12	1563	102	Sat	1	N-East	6.13438844680786	0.136864796280861	12.1850128173828	0.881883502006531	60.1421737670898	72
1564	1997-04-13	1997	4	13	1564	103	Sun	1	N-East	8.50926303863525	4.22143650054932	12.7990837097168	5.19590616226196	70.0543518066406	81
1565	1997-04-14	1997	4	14	1565	104	Mon	1	N-East	9.78529071807861	7.78887033462524	11.7817125320435	5.94503593444824	73.0135116577148	73
1566	1997-04-15	1997	4	15	1566	105	Tue	1	N-East	6.63121557235718	2.31011533737183	10.9523162841797	-0.0549640618264675	56.6152496337891	78
1567	1997-04-16	1997	4	16	1567	106	Wed	1	N-East	6.5252480506897	1.81634712219238	11.2341499328613	2.13510775566101	62.3755416870117	88
1568	1997-04-17	1997	4	17	1568	107	Thu	1	N-East	8.72286510467529	6.96319675445557	10.4825315475464	4.98188352584839	75.7018432617188	76
1569	1997-04-18	1997	4	18	1569	108	Fri	1	N-East	9.1266622543335	6.79436016082764	11.4589643478394	4.22456502914429	69.9310150146484	81
1570	1997-04-19	1997	4	19	1570	109	Sat	1	N-East	5.78840494155884	3.50603604316711	8.09156894683838	-2.73449301719666	53.8006134033203	77
1571	1997-04-20	1997	4	20	1571	110	Sun	1	N-East	6.74778461456299	3.09136891365051	10.4081697463989	-2.72221064567566	48.7766647338867	80
1572	1997-04-21	1997	4	21	1572	111	Mon	1	N-East	5.07306575775146	2.27907419204712	7.86705732345581	0.461412638425827	65.7193450927734	66
1573	1997-04-22	1997	4	22	1573	112	Tue	1	N-East	5.7126727104187	2.07255172729492	9.35279369354248	0.404094189405441	64.5883407592773	84
1574	1997-04-23	1997	4	23	1574	113	Wed	1	N-East	6.46455335617065	0.542422831058502	12.4447231292725	0.636847615242004	50.0351066589355	77
1575	1997-04-24	1997	4	24	1575	114	Thu	1	N-East	9.33915996551514	6.98337650299072	11.6949434280396	5.75087022781372	68.8601837158203	79
1576	1997-04-25	1997	4	25	1576	115	Fri	1	N-East	6.40710163116455	4.91120290756226	7.90300035476685	0.387717485427856	60.459056854248	96
1577	1997-04-26	1997	4	26	1577	116	Sat	1	N-East	6.77397203445435	4.92652225494385	8.62142181396484	5.06724643707275	89.5771789550781	82
1578	1997-04-27	1997	4	27	1578	117	Sun	1	N-East	10.9558629989624	6.58001661300659	15.3317098617554	7.89181184768677	77.0147323608398	77
1579	1997-04-28	1997	4	28	1579	118	Mon	1	N-East	12.2216844558716	9.52044582366943	14.922924041748	7.56550693511963	70.8596725463867	85
1580	1997-04-29	1997	4	29	1580	119	Tue	1	N-East	12.2440824508667	9.07365131378174	15.4145154953003	4.91637706756592	56.7713394165039	82
1581	1997-04-30	1997	4	30	1581	120	Wed	1	N-East	13.0180110931396	6.24294471740723	19.7930736541748	7.12456512451172	57.9415550231934	81
1582	1997-05-01	1997	5	1	1582	121	Thu	1	N-East	15.0200757980347	8.18677425384521	21.8533782958984	9.13213920593262	53.3847503662109	76
1583	1997-05-02	1997	5	2	1583	122	Fri	1	N-East	14.7815771102905	7.51842212677002	22.0447330474854	8.4777889251709	53.0322418212891	76
1584	1997-05-03	1997	5	3	1584	123	Sat	1	N-East	10.6854639053345	6.91098070144653	14.4599475860596	7.70409440994263	93.3432922363281	83
1585	1997-05-04	1997	5	4	1585	124	Sun	1	N-East	12.3783025741577	8.29354000091553	16.4630641937256	9.07134056091309	71.386589050293	75
1586	1997-05-05	1997	5	5	1586	125	Mon	1	N-East	6.51045846939087	3.63648819923401	9.38442897796631	2.22865915298462	82.8590545654297	75
1587	1997-05-06	1997	5	6	1587	126	Tue	1	N-East	4.18707847595215	0.208368569612503	8.16578769683838	-5.4730806350708	46.8018455505371	77
1588	1997-05-07	1997	5	7	1588	127	Wed	1	N-East	5.30696582794189	0.189553558826447	10.4243774414062	-1.35086989402771	54.5234413146973	67
1589	1997-05-08	1997	5	8	1589	128	Thu	1	N-East	5.85288190841675	2.17848944664001	9.52727508544922	2.31637668609619	74.0163803100586	76
1590	1997-05-09	1997	5	9	1590	129	Fri	1	N-East	5.97218942642212	0.311341911554337	11.6330366134644	1.57369518280029	56.8100318908691	75
1591	1997-05-10	1997	5	10	1591	130	Sat	1	N-East	6.26046466827393	1.14518094062805	11.3757486343384	5.3040943145752	82.2713470458984	74
1592	1997-05-11	1997	5	11	1592	131	Sun	1	N-East	8.02187442779541	4.10455989837646	11.9391889572144	6.42047071456909	74.6684875488281	81
1593	1997-05-12	1997	5	12	1593	132	Mon	1	N-East	9.34685039520264	6.40267610549927	12.2910251617432	4.49590587615967	63.7648963928223	82
1594	1997-05-13	1997	5	13	1594	133	Tue	1	N-East	10.6979751586914	7.19543504714966	14.2005176544189	5.80000019073486	64.6549606323242	81
1595	1997-05-14	1997	5	14	1595	134	Wed	1	N-East	11.9048948287964	7.71258783340454	16.0972023010254	5.62221050262451	56.1584434509277	81
1596	1997-05-15	1997	5	15	1596	135	Thu	1	N-East	10.2903003692627	3.38462162017822	17.1959800720215	5.96141242980957	57.9264106750488	77
1597	1997-05-16	1997	5	16	1597	136	Fri	1	N-East	9.0640230178833	5.9655065536499	12.162540435791	7.22865867614746	82.8620223999023	75
1598	1997-05-17	1997	5	17	1598	137	Sat	1	N-East	9.58310985565186	7.89347791671753	11.2727422714233	8.60409450531006	91.3877182006836	82
1599	1997-05-18	1997	5	18	1599	138	Sun	1	N-East	11.3818826675415	8.5925121307373	14.1712522506714	10.2672472000122	96.6146392822266	72
1600	1997-05-19	1997	5	19	1600	139	Mon	1	N-East	11.3770484924316	8.54006481170654	14.2140321731567	9.97952842712402	86.810546875	85
1601	1997-05-20	1997	5	20	1601	140	Tue	1	N-East	10.6136951446533	8.37965869903564	12.8477334976196	9.29590606689453	88.9719543457031	73
1602	1997-05-21	1997	5	21	1602	141	Wed	1	N-East	7.77784729003906	6.51577425003052	9.03992080688477	3.86141276359558	75.2228240966797	78
1603	1997-05-22	1997	5	22	1603	142	Thu	1	N-East	7.02763938903809	3.52416610717773	10.5311126708984	0.210542768239975	56.0872039794922	84
1604	1997-05-23	1997	5	23	1604	143	Fri	1	N-East	6.79329109191895	2.20749545097351	11.3790864944458	-0.148515477776527	51.171443939209	66
1605	1997-05-24	1997	5	24	1605	144	Sat	1	N-East	7.59095001220703	1.490842461586	13.6910581588745	0.0432961769402027	47.0778923034668	70
1606	1997-05-25	1997	5	25	1606	145	Sun	1	N-East	11.0829963684082	4.54348373413086	17.6225109100342	1.61873126029968	40.4182205200195	78
1607	1997-05-26	1997	5	26	1607	146	Mon	1	N-East	13.6433095932007	9.08878231048584	18.1978340148926	9.43684673309326	71.3398132324219	78
1608	1997-05-27	1997	5	27	1608	147	Tue	1	N-East	11.3290824890137	8.50050354003906	14.1576614379883	5.44094181060791	67.6029739379883	72
1609	1997-05-28	1997	5	28	1609	148	Wed	1	N-East	12.5583267211914	7.09162616729736	18.0250282287598	4.72865867614746	55.9427833557129	62
1610	1997-05-29	1997	5	29	1610	149	Thu	1	N-East	14.792254447937	8.10605430603027	21.4784545898438	10.3000001907349	57.2042007446289	71
1611	1997-05-30	1997	5	30	1611	150	Fri	1	N-East	16.2556743621826	8.27397346496582	24.2373733520508	10.8040943145752	54.2042999267578	82
1612	1997-05-31	1997	5	31	1612	151	Sat	1	N-East	13.2855253219604	9.34821128845215	17.2228374481201	9.57543563842773	89.5473937988281	82
1613	1997-06-01	1997	6	1	1613	152	Sun	1	N-East	12.5086975097656	8.48503112792969	16.5323638916016	5.37195539474487	57.4194488525391	83
1614	1997-06-02	1997	6	2	1614	153	Mon	1	N-East	10.4758281707764	8.16062641143799	12.7910299301147	7.54503583908081	83.1743087768555	80
1615	1997-06-03	1997	6	3	1615	154	Tue	1	N-East	11.9361133575439	8.59981155395508	15.2724170684814	7.31228303909302	70.5831146240234	73
1616	1997-06-04	1997	6	4	1616	155	Wed	1	N-East	12.2420129776001	6.71985530853271	17.7641716003418	5.12696552276611	66.4271850585938	77
1617	1997-06-05	1997	6	5	1617	156	Thu	1	N-East	14.1892967224121	8.94388103485107	19.4347114562988	7.49007225036621	56.3381843566895	80
1618	1997-06-06	1997	6	6	1618	157	Fri	1	N-East	15.527117729187	10.82825756073	20.225980758667	11.6000003814697	64.0071640014648	75
1619	1997-06-07	1997	6	7	1619	158	Sat	1	N-East	18.0393199920654	14.8009643554688	21.2776699066162	10.9450349807739	60.7773818969727	87
1620	1997-06-08	1997	6	8	1620	159	Sun	1	N-East	16.7846736907959	12.5645341873169	21.0048160552979	8.694167137146	50.0252838134766	78
1621	1997-06-09	1997	6	9	1621	160	Mon	1	N-East	14.4550914764404	9.3759183883667	19.5342655181885	5.59416627883911	49.945140838623	74
1622	1997-06-10	1997	6	10	1622	161	Tue	1	N-East	15.4640350341797	10.7858419418335	20.1422290802002	9.68188381195068	58.2580375671387	76
1623	1997-06-11	1997	6	11	1623	162	Wed	1	N-East	12.7608327865601	11.2513122558594	14.2703542709351	11.3713407516479	92.545036315918	72
1624	1997-06-12	1997	6	12	1624	163	Thu	1	N-East	13.8510541915894	11.7077207565308	15.9943857192993	12.2426815032959	93.6836242675781	87
1625	1997-06-13	1997	6	13	1625	164	Fri	1	N-East	14.5018453598022	11.4029769897461	17.6007137298584	11.9245643615723	77.3977508544922	80
1626	1997-06-14	1997	6	14	1626	165	Sat	1	N-East	10.0746774673462	8.63813781738281	11.5112180709839	5.22047090530396	73.0473861694336	70
1627	1997-06-15	1997	6	15	1627	166	Sun	1	N-East	10.2286939620972	7.47996759414673	12.9774198532104	5.08771705627441	64.8491363525391	65
1628	1997-06-16	1997	6	16	1628	167	Mon	1	N-East	11.384861946106	6.37167739868164	16.3980484008789	7.39416646957397	63.1311149597168	89
1629	1997-06-17	1997	6	17	1629	168	Tue	1	N-East	13.4629135131836	9.96551036834717	16.9603176116943	7.71463680267334	56.9030723571777	82
1630	1997-06-18	1997	6	18	1630	169	Wed	1	N-East	12.5850915908813	7.7142186164856	17.4559650421143	6.29826021194458	51.1977462768555	72
1631	1997-06-19	1997	6	19	1631	170	Thu	1	N-East	12.9085416793823	9.97337341308594	15.8437128067017	10.2327527999878	76.9380722045898	81
1632	1997-06-20	1997	6	20	1632	171	Fri	1	N-East	12.078351020813	8.2953987121582	15.8613052368164	7.60644865036011	65.2427825927734	79
1633	1997-06-21	1997	6	21	1633	172	Sat	1	N-East	12.7718648910522	9.88746166229248	15.6562700271606	10.6686429977417	83.4114456176758	91
1634	1997-06-22	1997	6	22	1634	173	Sun	1	N-East	12.9268970489502	9.8599681854248	15.9938278198242	8.49007225036621	69.8685836791992	67
1635	1997-06-23	1997	6	23	1635	174	Mon	1	N-East	11.6671543121338	9.41497611999512	13.9193315505981	5.6163763999939	67.3310165405273	75
1636	1997-06-24	1997	6	24	1636	175	Tue	1	N-East	11.2608737945557	8.2925443649292	14.2292032241821	4.41637659072876	59.3169898986816	73
1637	1997-06-25	1997	6	25	1637	176	Wed	1	N-East	9.97073364257812	8.07454204559326	11.8669233322144	9.79999923706055	89.5812683105469	79
1638	1997-06-26	1997	6	26	1638	177	Thu	1	N-East	9.51651573181152	7.63952398300171	11.3935070037842	7.60000038146973	87.0280380249023	81
1639	1997-06-27	1997	6	27	1639	178	Fri	1	N-East	10.6349620819092	8.84948062896729	12.4204435348511	8.02456569671631	81.6047058105469	73
1640	1997-06-28	1997	6	28	1640	179	Sat	1	N-East	10.513014793396	9.29572677612305	11.7303037643433	10.9918117523193	97.0877151489258	74
1641	1997-06-29	1997	6	29	1641	180	Sun	1	N-East	10.5653820037842	9.08367919921875	12.0470867156982	8.60409450531006	88.2695922851562	72
1642	1997-06-30	1997	6	30	1642	181	Mon	1	N-East	9.8675479888916	8.54363918304443	11.1914577484131	7.81228303909302	86.4836196899414	72
1643	1997-07-01	1997	7	1	1643	182	Tue	1	N-East	9.79039192199707	7.97354412078857	11.6072378158569	7.62047147750854	86.6327514648438	74
1644	1997-07-02	1997	7	2	1644	183	Wed	1	N-East	11.5693759918213	8.21522998809814	14.9235210418701	8.64094257354736	73.3602981567383	78
1645	1997-07-03	1997	7	3	1645	184	Thu	1	N-East	12.7777624130249	9.82751369476318	15.7280111312866	9.33275318145752	79.8204727172852	75
1646	1997-07-04	1997	7	4	1646	185	Fri	1	N-East	13.4155216217041	8.04600048065186	18.785041809082	10.6122827529907	73.0292739868164	88
1647	1997-07-05	1997	7	5	1647	186	Sat	1	N-East	15.1862487792969	9.82259941101074	20.5498962402344	8.14329624176025	55.7767715454102	73
1648	1997-07-06	1997	7	6	1648	187	Sun	1	N-East	17.7887325286865	12.523286819458	23.0541801452637	12.6122827529907	62.6263084411621	70
1649	1997-07-07	1997	7	7	1649	188	Mon	1	N-East	19.2704372406006	15.2649641036987	23.2759094238281	12.0532245635986	57.5561904907227	72
1650	1997-07-08	1997	7	8	1650	189	Tue	1	N-East	18.0604572296143	12.4254283905029	23.6954879760742	12.8450355529785	64.3298950195312	59
1651	1997-07-09	1997	7	9	1651	190	Wed	1	N-East	19.0272941589355	13.324990272522	24.7295951843262	14.7918119430542	66.1129989624023	67
1652	1997-07-10	1997	7	10	1652	191	Thu	1	N-East	15.9499063491821	12.4744644165039	19.4253482818604	11.9795293807983	72.0656127929688	82
1653	1997-07-11	1997	7	11	1653	192	Fri	1	N-East	16.5668392181396	12.2663297653198	20.8673515319824	11.3877172470093	70.3439102172852	83
1654	1997-07-12	1997	7	12	1654	193	Sat	1	N-East	16.6095294952393	11.9416799545288	21.2773761749268	11.057318687439	60.9720573425293	72
1655	1997-07-13	1997	7	13	1655	194	Sun	1	N-East	17.8671588897705	13.6855878829956	22.0487289428711	12.2023553848267	61.6381797790527	70
1656	1997-07-14	1997	7	14	1656	195	Mon	1	N-East	15.7516717910767	11.6888189315796	19.814525604248	7.46960115432739	52.874927520752	83
1657	1997-07-15	1997	7	15	1657	196	Tue	1	N-East	16.0118618011475	11.3520593643188	20.671667098999	12.1081886291504	66.7105407714844	58
1658	1997-07-16	1997	7	16	1658	197	Wed	1	N-East	16.8523826599121	14.4757375717163	19.2290325164795	11.9163761138916	67.1696014404297	68
1659	1997-07-17	1997	7	17	1659	198	Thu	1	N-East	14.4786672592163	11.152515411377	17.804817199707	10.8000001907349	76.3789138793945	81
1660	1997-07-18	1997	7	18	1660	199	Fri	1	N-East	15.5098495483398	11.8901119232178	19.1295890808105	11.7204713821411	76.1152572631836	67
1661	1997-07-19	1997	7	19	1661	200	Sat	1	N-East	16.5266132354736	10.1226348876953	22.9305934906006	10.9696006774902	63.6597747802734	60
1662	1997-07-20	1997	7	20	1662	201	Sun	1	N-East	15.5547618865967	9.48108291625977	21.6284370422363	11.4122819900513	77.5123825073242	72
1663	1997-07-21	1997	7	21	1663	202	Mon	1	N-East	15.851336479187	8.56850910186768	23.1341648101807	9.66550731658936	55.9896697998047	82
1664	1997-07-22	1997	7	22	1664	203	Tue	1	N-East	14.7479848861694	11.1871767044067	18.3087940216064	12.6999998092651	85.879020690918	72
1665	1997-07-23	1997	7	23	1665	204	Wed	1	N-East	18.0609245300293	13.3430738449097	22.7787761688232	11.7310132980347	65.1586532592773	59
1666	1997-07-24	1997	7	24	1666	205	Thu	1	N-East	16.5871677398682	13.2778263092041	19.8965091705322	14.8918113708496	85.2169952392578	79
1667	1997-07-25	1997	7	25	1667	206	Fri	1	N-East	16.375431060791	12.3245468139648	20.4263134002686	10.4655065536499	67.1275405883789	86
1668	1997-07-26	1997	7	26	1668	207	Sat	1	N-East	14.8845615386963	11.6837453842163	18.0853786468506	11.9614124298096	77.0094146728516	69
1669	1997-07-27	1997	7	27	1669	208	Sun	1	N-East	16.02463722229	11.359842300415	20.6894340515137	9.62691879272461	59.3778915405273	68
1670	1997-07-28	1997	7	28	1670	209	Mon	1	N-East	17.3044185638428	13.5874452590942	21.0213966369629	11.9491300582886	66.349739074707	80
1671	1997-07-29	1997	7	29	1671	210	Tue	1	N-East	17.4827098846436	11.0941925048828	23.8712310791016	12.0368480682373	57.1702156066895	65
1672	1997-07-30	1997	7	30	1672	211	Wed	1	N-East	16.3940048217773	13.2048282623291	19.5831813812256	9.33101367950439	57.6287651062012	66
1673	1997-07-31	1997	7	31	1673	212	Thu	1	N-East	15.1528854370117	12.6199989318848	17.68577003479	10.7631530761719	70.8724594116211	63
1674	1997-08-01	1997	8	1	1674	213	Fri	1	N-East	18.0854320526123	14.361759185791	21.8091049194336	14.6672468185425	77.9215927124023	67
1675	1997-08-02	1997	8	2	1675	214	Sat	1	N-East	14.3702535629272	10.1331119537354	18.6073970794678	8.98188304901123	62.3070602416992	74
1676	1997-08-03	1997	8	3	1676	215	Sun	1	N-East	15.5789022445679	12.225209236145	18.932596206665	9.45557880401611	58.0235443115234	58
1677	1997-08-04	1997	8	4	1677	216	Mon	1	N-East	14.2786655426025	9.35057830810547	19.2067527770996	10.7146377563477	66.2550659179688	57
1678	1997-08-05	1997	8	5	1678	217	Tue	1	N-East	14.9505043029785	11.5228424072266	18.3781661987305	11.1573181152344	71.1111526489258	60
1679	1997-08-06	1997	8	6	1679	218	Wed	1	N-East	17.8364849090576	13.8248300552368	21.8481407165527	15.024564743042	79.2994918823242	78
1680	1997-08-07	1997	8	7	1680	219	Thu	1	N-East	19.3583011627197	15.0414180755615	23.6751861572266	15.8286600112915	75.7878189086914	64
1681	1997-08-08	1997	8	8	1681	220	Fri	1	N-East	19.8670825958252	12.1849012374878	27.5492668151855	14.2859773635864	55.582088470459	70
1682	1997-08-09	1997	8	9	1682	221	Sat	1	N-East	20.6043434143066	16.9787883758545	24.2298984527588	15.3999996185303	69.7234420776367	74
1683	1997-08-10	1997	8	10	1683	222	Sun	1	N-East	17.9261379241943	12.9655160903931	22.8867568969727	15.4286594390869	75.3556823730469	71
1684	1997-08-11	1997	8	11	1684	223	Mon	1	N-East	19.745246887207	15.5975818634033	23.8929100036621	16.136848449707	79.3421783447266	73
1685	1997-08-12	1997	8	12	1685	224	Tue	1	N-East	22.5614223480225	16.3560085296631	28.7668380737305	16.3163757324219	61.3468818664551	80
1686	1997-08-13	1997	8	13	1686	225	Wed	1	N-East	19.5733070373535	17.2919464111328	21.854663848877	17.2245655059814	82.7094192504883	76
1687	1997-08-14	1997	8	14	1687	226	Thu	1	N-East	19.9960689544678	15.2733697891235	24.7187728881836	13.4187316894531	63.9264068603516	54
1688	1997-08-15	1997	8	15	1688	227	Fri	1	N-East	18.8696842193604	13.3284721374512	24.4108963012695	13.9286584854126	62.4122848510742	69
1689	1997-08-16	1997	8	16	1689	228	Sat	1	N-East	20.0284729003906	12.8625526428223	27.1943950653076	13.4900712966919	55.4890518188477	60
1690	1997-08-17	1997	8	17	1690	229	Sun	1	N-East	19.2027740478516	13.2734718322754	25.1320762634277	16.020471572876	75.0439071655273	75
1691	1997-08-18	1997	8	18	1691	230	Mon	1	N-East	18.0929355621338	14.8367919921875	21.3490810394287	14.9245653152466	75.6322326660156	61
1692	1997-08-19	1997	8	19	1692	231	Tue	1	N-East	18.8421878814697	15.1724910736084	22.5118846893311	16.112283706665	82.1895599365234	72
1693	1997-08-20	1997	8	20	1693	232	Wed	1	N-East	20.8611240386963	14.7100801467896	27.0121650695801	11.9310131072998	47.1598777770996	67
1694	1997-08-21	1997	8	21	1694	233	Thu	1	N-East	18.7630615234375	16.9859924316406	20.5401306152344	16.9672470092773	85.6988754272461	74
1695	1997-08-22	1997	8	22	1695	234	Fri	1	N-East	16.7035179138184	12.8951635360718	20.5118732452393	11.1327533721924	62.276050567627	67
1696	1997-08-23	1997	8	23	1696	235	Sat	1	N-East	13.4747867584229	10.8622179031372	16.0873565673828	13.0795297622681	89.5099258422852	75
1697	1997-08-24	1997	8	24	1697	236	Sun	1	N-East	14.2605142593384	13.1931667327881	15.32785987854	12.8409414291382	91.7245635986328	72
1698	1997-08-25	1997	8	25	1698	237	Mon	1	N-East	16.4564800262451	12.4711122512817	20.4744148254395	10.9105434417725	68.3100357055664	69
1699	1997-08-26	1997	8	26	1699	238	Tue	1	N-East	15.3943176269531	10.0182619094849	20.7703742980957	9.69826030731201	58.054557800293	63
1700	1997-08-27	1997	8	27	1700	239	Wed	1	N-East	15.2593908309937	12.4861001968384	18.0326805114746	13.6286582946777	82.2544555664062	72
1701	1997-08-28	1997	8	28	1701	240	Thu	1	N-East	12.9793787002563	8.66370105743408	17.2950553894043	10.6105432510376	70.6621246337891	76
1702	1997-08-29	1997	8	29	1702	241	Fri	1	N-East	14.7689266204834	10.7025890350342	18.8352642059326	9.67369556427002	63.6006164550781	77
1703	1997-08-30	1997	8	30	1703	242	Sat	1	N-East	15.1586141586304	9.34793186187744	20.9692993164062	9.86550712585449	64.8568115234375	82
1704	1997-08-31	1997	8	31	1704	243	Sun	1	N-East	12.030179977417	7.97746753692627	16.0828895568848	11.7163772583008	87.6801452636719	71
1705	1997-09-01	1997	9	1	1705	244	Mon	1	N-East	15.3037338256836	12.1715831756592	18.4358806610107	12.9204711914062	79.1163787841797	62
1706	1997-09-02	1997	9	2	1706	245	Tue	1	N-East	14.0201959609985	9.19555282592773	18.844841003418	9.9163761138916	63.7432899475098	80
1707	1997-09-03	1997	9	3	1707	246	Wed	1	N-East	15.2999782562256	13.2625427246094	17.3374137878418	14.020471572876	87.5801467895508	66
1708	1997-09-04	1997	9	4	1708	247	Thu	1	N-East	13.6948537826538	9.12599277496338	18.2637138366699	9.73684787750244	63.0889472961426	72
1709	1997-09-05	1997	9	5	1709	248	Fri	1	N-East	15.1020612716675	11.7480802536011	18.4560413360596	8.89590454101562	61.1450347900391	74
1710	1997-09-06	1997	9	6	1710	249	Sat	1	N-East	13.4244623184204	10.1956052780151	16.6533184051514	10.5672473907471	79.0140228271484	79
1711	1997-09-07	1997	9	7	1711	250	Sun	1	N-East	15.5160064697266	12.1422061920166	18.8898105621338	10.8795280456543	69.0584487915039	58
1712	1997-09-08	1997	9	8	1712	251	Mon	1	N-East	15.4639911651611	12.3451547622681	18.5828247070312	9.37952899932861	60.715763092041	74
1713	1997-09-09	1997	9	9	1713	252	Tue	1	N-East	13.8838834762573	9.29611206054688	18.4716548919678	5.21637678146362	52.86376953125	85
1714	1997-09-10	1997	9	10	1714	253	Wed	1	N-East	13.1866426467896	5.5879921913147	20.7852916717529	6.74503564834595	53.7128982543945	86
1715	1997-09-11	1997	9	11	1715	254	Thu	1	N-East	13.9711313247681	9.29174613952637	18.6505165100098	8.22282600402832	58.7106475830078	61
1716	1997-09-12	1997	9	12	1716	255	Fri	1	N-East	11.5354108810425	8.90123653411865	14.1731767654419	3.88188362121582	57.0357246398926	78
1717	1997-09-13	1997	9	13	1717	256	Sat	1	N-East	9.87942504882812	6.12849950790405	13.6303491592407	3.15496397018433	57.9321365356445	65
1718	1997-09-14	1997	9	14	1718	257	Sun	1	N-East	11.8740158081055	7.37530899047852	16.3296546936035	7.04503631591797	61.8514823913574	64
1719	1997-09-15	1997	9	15	1719	258	Mon	1	N-East	14.9109201431274	11.8609733581543	17.960865020752	9.57134056091309	62.9187278747559	77
1720	1997-09-16	1997	9	16	1720	259	Tue	1	N-East	14.2684755325317	10.8416557312012	17.6952953338623	11.5245656967163	68.6193466186523	71
1721	1997-09-17	1997	9	17	1721	260	Wed	1	N-East	13.2814197540283	9.00951194763184	17.5533275604248	7.3532247543335	62.4766616821289	73
1722	1997-09-18	1997	9	18	1722	261	Thu	1	N-East	10.9994611740112	8.50356864929199	13.4953536987305	8.13684749603271	78.4105453491211	65
1723	1997-09-19	1997	9	19	1723	262	Fri	1	N-East	9.48376750946045	4.5816798210144	14.3925971984863	4.86550664901733	61.156192779541	82
1724	1997-09-20	1997	9	20	1724	263	Sat	1	N-East	9.73488235473633	4.39730310440063	15.0724601745605	7.62047147750854	70.5883331298828	80
1725	1997-09-21	1997	9	21	1725	264	Sun	1	N-East	11.1977815628052	4.72074222564697	17.7457733154297	6.49007225036621	63.3305053710938	78
1726	1997-09-22	1997	9	22	1726	265	Mon	1	N-East	10.3080244064331	3.63283634185791	16.9832153320312	5.9228253364563	63.3240509033203	73
1727	1997-09-23	1997	9	23	1727	266	Tue	1	N-East	9.98506450653076	3.35552358627319	16.6146049499512	6.00235414505005	66.5176010131836	82
1728	1997-09-24	1997	9	24	1728	267	Wed	1	N-East	11.3398752212524	4.78930282592773	17.8904476165771	7.38188362121582	68.0626449584961	71
1729	1997-09-25	1997	9	25	1729	268	Thu	1	N-East	11.9980773925781	6.98097944259644	17.0151748657227	8.85322380065918	75.5094146728516	81
1730	1997-09-26	1997	9	26	1730	269	Fri	1	N-East	11.9649324417114	10.5904016494751	13.3394622802734	10.4450359344482	84.2520980834961	64
1731	1997-09-27	1997	9	27	1731	270	Sat	1	N-East	12.2887392044067	10.7882699966431	13.7892084121704	9.94913005828857	81.7257995605469	79
1732	1997-09-28	1997	9	28	1732	271	Sun	1	N-East	13.9758100509644	10.5700426101685	17.3815803527832	8.32836723327637	66.1171646118164	81
1733	1997-09-29	1997	9	29	1733	272	Mon	1	N-East	14.5642385482788	11.9332485198975	17.1952285766602	9.80818843841553	65.4590606689453	78
1734	1997-09-30	1997	9	30	1734	273	Tue	1	N-East	12.1489477157593	8.3348913192749	15.9630041122437	8.01637649536133	74.1333694458008	87
1735	1997-10-01	1997	10	1	1735	274	Wed	1	N-East	14.4569053649902	10.4320363998413	18.4817752838135	11.3549633026123	71.1830062866211	88
1736	1997-10-02	1997	10	2	1736	275	Thu	1	N-East	12.0766439437866	8.86159801483154	15.2916898727417	6.7204704284668	65.5391998291016	68
1737	1997-10-03	1997	10	3	1737	276	Fri	1	N-East	12.8575372695923	8.2781400680542	17.4369316101074	10.0040941238403	76.0303955078125	71
1738	1997-10-04	1997	10	4	1738	277	Sat	1	N-East	15.4456310272217	12.5311470031738	18.3601131439209	11.5245656967163	71.114013671875	88
1739	1997-10-05	1997	10	5	1739	278	Sun	1	N-East	15.0048761367798	12.7986450195312	17.2111053466797	6.98188352584839	56.5988731384277	74
1740	1997-10-06	1997	10	6	1740	279	Mon	1	N-East	12.9475660324097	10.1374387741089	15.7576951980591	11.1122827529907	82.0339813232422	92
1741	1997-10-07	1997	10	7	1741	280	Tue	1	N-East	11.0622539520264	8.58127880096436	13.5432300567627	7.3040943145752	74.7169876098633	75
1742	1997-10-08	1997	10	8	1742	281	Wed	1	N-East	11.4463567733765	7.53788661956787	15.3548288345337	7.36141300201416	67.5936584472656	70
1743	1997-10-09	1997	10	9	1743	282	Thu	1	N-East	12.0863475799561	8.26191329956055	15.9107837677002	6.39416646957397	67.6544494628906	93
1744	1997-10-10	1997	10	10	1744	283	Fri	1	N-East	10.7086753845215	7.78515005111694	13.6321992874146	6.7204704284668	69.8596649169922	82
1745	1997-10-11	1997	10	11	1745	284	Sat	1	N-East	9.1572208404541	6.48414897918701	11.8302888870239	3.94913029670715	70.9286575317383	74
1746	1997-10-12	1997	10	12	1746	285	Sun	1	N-East	6.67536592483521	3.36278629302979	9.98794555664062	-0.918116450309753	58.1316299438477	70
1747	1997-10-13	1997	10	13	1747	286	Mon	1	N-East	7.26803874969482	4.48358249664307	10.0524969100952	0.994166076183319	62.0380783081055	79
1748	1997-10-14	1997	10	14	1748	287	Tue	1	N-East	5.3563175201416	2.31814646720886	8.39448642730713	2.55322432518005	74.7450256347656	68
1749	1997-10-15	1997	10	15	1749	288	Wed	1	N-East	7.81233882904053	5.67126512527466	9.95341300964355	7.79590606689453	90.7304000854492	70
1750	1997-10-16	1997	10	16	1750	289	Thu	1	N-East	11.4831504821777	8.12412261962891	14.8421783447266	9.98808670043945	91.274543762207	79
1751	1997-10-17	1997	10	17	1751	290	Fri	1	N-East	14.8983306884766	11.5713844299316	18.2252731323242	11.9204702377319	74.9473876953125	77
1752	1997-10-18	1997	10	18	1752	291	Sat	1	N-East	15.4868202209473	10.3774309158325	20.5962085723877	11.3409423828125	67.28076171875	72
1753	1997-10-19	1997	10	19	1753	292	Sun	1	N-East	9.5347261428833	6.29932117462158	12.7701320648193	7.61463689804077	85.2825012207031	63
1754	1997-10-20	1997	10	20	1754	293	Mon	1	N-East	8.09952354431152	6.44131660461426	9.75773239135742	-0.285363048315048	55.7223129272461	71
1755	1997-10-21	1997	10	21	1755	294	Tue	1	N-East	7.82922649383545	5.94673299789429	9.71172142028809	0.824565052986145	55.5965194702148	73
1756	1997-10-22	1997	10	22	1756	295	Wed	1	N-East	5.68852186203003	0.960944950580597	10.4160985946655	2.05731844902039	72.1163787841797	83
1757	1997-10-23	1997	10	23	1757	296	Thu	1	N-East	6.80822992324829	4.71599292755127	8.90046787261963	-0.522210657596588	55.8807601928711	84
1758	1997-10-24	1997	10	24	1758	297	Fri	1	N-East	5.5320520401001	1.91498994827271	9.14911460876465	-2.61402225494385	54.9807548522949	80
1759	1997-10-25	1997	10	25	1759	298	Sat	1	N-East	6.8031849861145	1.67007124423981	11.9362983703613	3.36550664901733	67.8824996948242	84
1760	1997-10-26	1997	10	26	1760	299	Sun	1	N-East	7.53683042526245	5.56683778762817	9.50682258605957	3.48188352584839	68.7035827636719	103
1761	1997-10-27	1997	10	27	1761	300	Mon	1	N-East	8.81018352508545	6.71559190750122	10.9047746658325	7.81228303909302	86.9631500244141	77
1762	1997-10-28	1997	10	28	1762	301	Tue	1	N-East	5.22701692581177	2.036780834198	8.41725444793701	-0.897645592689514	61.5503578186035	61
1763	1997-10-29	1997	10	29	1763	302	Wed	1	N-East	3.04953408241272	-3.23603558540344	9.33510398864746	-4.10992813110352	56.9900703430176	77
1764	1997-10-30	1997	10	30	1764	303	Thu	1	N-East	6.08655834197998	-0.233005285263062	12.4061212539673	6.12456512451172	81.1555786132812	89
1765	1997-10-31	1997	10	31	1765	304	Fri	1	N-East	8.35207557678223	2.77816486358643	13.9259843826294	5.80644845962524	84.1538391113281	78
1766	1997-11-01	1997	11	1	1766	305	Sat	1	N-East	9.83336544036865	5.1128568649292	14.5538740158081	8.16550731658936	81.7859725952148	77
1767	1997-11-02	1997	11	2	1767	306	Sun	1	N-East	10.1762704849243	8.35089206695557	12.0016479492188	7.83275413513184	85.3456573486328	77
1768	1997-11-03	1997	11	3	1768	307	Mon	1	N-East	9.0491418838501	7.57768774032593	10.5205965042114	6.13275337219238	80.682502746582	66
1769	1997-11-04	1997	11	4	1769	308	Tue	1	N-East	8.6397705078125	7.53015947341919	9.74938011169434	5.10818815231323	75.4146423339844	86
1770	1997-11-05	1997	11	5	1770	309	Wed	1	N-East	10.2243661880493	8.06838035583496	12.3803548812866	10.1081886291504	90.0398178100586	96
1771	1997-11-06	1997	11	6	1771	310	Thu	1	N-East	10.2004823684692	8.36132335662842	12.0396404266357	8.6204719543457	86.6965179443359	91
1772	1997-11-07	1997	11	7	1772	311	Fri	1	N-East	6.37619924545288	3.06014394760132	9.69225597381592	4.19181156158447	82.3239517211914	82
1773	1997-11-08	1997	11	8	1773	312	Sat	1	N-East	5.22027349472046	1.0221483707428	9.41839790344238	7.62865972518921	90.7006149291992	76
1774	1997-11-09	1997	11	9	1774	313	Sun	1	N-East	5.42640352249146	3.82219481468201	7.03061151504517	4.91228246688843	91.4637756347656	81
1775	1997-11-10	1997	11	10	1775	314	Mon	1	N-East	6.57419681549072	3.78745698928833	9.36093711853027	4.08188343048096	78.4509735107422	79
1776	1997-11-11	1997	11	11	1776	315	Tue	1	N-East	8.73455619812012	5.63187313079834	11.8372383117676	5.33275413513184	77.2275390625	90
1777	1997-11-12	1997	11	12	1777	316	Wed	1	N-East	7.24510526657104	3.24961829185486	11.2405910491943	3.27369523048401	72.303581237793	83
1778	1997-11-13	1997	11	13	1778	317	Thu	1	N-East	5.47437763214111	2.04202747344971	8.90672874450684	3.25322437286377	78.2473907470703	83
1779	1997-11-14	1997	11	14	1779	318	Fri	1	N-East	5.28382778167725	0.268716514110565	10.2989377975464	2.8327534198761	85.8661117553711	77
1780	1997-11-15	1997	11	15	1780	319	Sat	1	N-East	8.21380996704102	3.56875801086426	12.8588619232178	6.80000019073486	88.2374649047852	93
1781	1997-11-16	1997	11	16	1781	320	Sun	1	N-East	11.6984424591064	8.55283164978027	14.8440542221069	12.5385885238647	88.1743087768555	73
1782	1997-11-17	1997	11	17	1782	321	Mon	1	N-East	11.7389793395996	10.0527448654175	13.4252138137817	9.90409374237061	83.9913101196289	97
1783	1997-11-18	1997	11	18	1783	322	Tue	1	N-East	10.4891157150269	8.47977828979492	12.4984550476074	7.52456521987915	86.0514907836914	74
1784	1997-11-19	1997	11	19	1784	323	Wed	1	N-East	9.9927225112915	8.56693172454834	11.4185132980347	8.55322456359863	84.1404266357422	88
1785	1997-11-20	1997	11	20	1785	324	Thu	1	N-East	9.34212207794189	8.44461441040039	10.2396306991577	8.37952899932861	92.9000015258789	81
1786	1997-11-21	1997	11	21	1786	325	Fri	1	N-East	7.04347085952759	4.46445369720459	9.62248706817627	3.83684754371643	76.228141784668	73
1787	1997-11-22	1997	11	22	1787	326	Sat	1	N-East	5.50931262969971	4.18283367156982	6.83579063415527	4.41637659072876	87.8620223999023	83
1788	1997-11-23	1997	11	23	1788	327	Sun	1	N-East	6.34010028839111	4.54455709457397	8.13564395904541	5.32865953445435	86.257926940918	71
1789	1997-11-24	1997	11	24	1789	328	Mon	1	N-East	7.13193273544312	6.21566867828369	8.04819583892822	5.72865867614746	84.1982650756836	92
1790	1997-11-25	1997	11	25	1790	329	Tue	1	N-East	7.2269229888916	6.56380271911621	7.8900408744812	4.31228256225586	77.2245635986328	95
1791	1997-11-26	1997	11	26	1791	330	Wed	1	N-East	7.99217748641968	6.8550853729248	9.12927055358887	7.90409421920776	93.5	77
1792	1997-11-27	1997	11	27	1792	331	Thu	1	N-East	8.37116527557373	7.32407331466675	9.41825675964355	8.87134075164795	97.371337890625	88
1793	1997-11-28	1997	11	28	1793	332	Fri	1	N-East	8.06830787658691	7.01539039611816	9.12122631072998	7.39999961853027	93.2040863037109	83
1794	1997-11-29	1997	11	29	1794	333	Sat	1	N-East	8.1725606918335	6.98676443099976	9.35835647583008	7.90000009536743	90.2736892700195	86
1795	1997-11-30	1997	11	30	1795	334	Sun	1	N-East	5.37285900115967	3.57674169540405	7.16897630691528	3.21811652183533	83.8560791015625	84
1796	1997-12-01	1997	12	1	1796	335	Mon	1	N-East	1.682746052742	-1.0561957359314	4.42168807983398	-2.9713408946991	70.6695938110352	83
1797	1997-12-02	1997	12	2	1797	336	Tue	1	N-East	0.105355143547058	-2.3466534614563	2.55736374855042	-0.995905816555023	86.3519897460938	90
1798	1997-12-03	1997	12	3	1798	337	Wed	1	N-East	2.08761239051819	0.23859603703022	3.93662929534912	1.1204708814621	86.9286575317383	79
1799	1997-12-04	1997	12	4	1799	338	Thu	1	N-East	3.19018793106079	1.49831342697144	4.8820629119873	0.608188331127167	79.4263076782227	72
1800	1997-12-05	1997	12	5	1800	339	Fri	1	N-East	5.78300714492798	1.98086667060852	9.58514881134033	0.769600987434387	65.9947814941406	82
1801	1997-12-06	1997	12	6	1801	340	Sat	1	N-East	8.94182777404785	6.11098098754883	11.7726755142212	7.8959059715271	76.1760406494141	82
1802	1997-12-07	1997	12	7	1802	341	Sun	1	N-East	9.12192821502686	6.85474586486816	11.4261655807495	4.94913053512573	78.1947860717773	91
1803	1997-12-08	1997	12	8	1803	342	Mon	1	N-East	9.14635848999023	7.35540580749512	10.9354963302612	5.99181222915649	75.6555786132812	79
1804	1997-12-09	1997	12	9	1804	343	Tue	1	N-East	9.51955032348633	7.3886547088623	11.6491594314575	4.62865924835205	70.4275283813477	70
1805	1997-12-10	1997	12	10	1805	344	Wed	1	N-East	9.19619178771973	5.81910467147827	12.5730056762695	8.46315288543701	82.6210861206055	102
1806	1997-12-11	1997	12	11	1806	345	Thu	1	N-East	7.5329794883728	5.34271287918091	9.72463321685791	6.2081880569458	86.4333648681641	80
1807	1997-12-12	1997	12	12	1807	346	Fri	1	N-East	5.07711362838745	2.69802975654602	7.46146678924561	-1	67.6058349609375	79
1808	1997-12-13	1997	12	13	1808	347	Sat	1	N-East	6.41863870620728	3.69857144355774	9.14303588867188	6.03858757019043	83.0918121337891	92
1809	1997-12-14	1997	12	14	1809	348	Sun	1	N-East	4.27796936035156	1.02729392051697	7.53434705734253	3.78771758079529	92.8789138793945	87
1810	1997-12-15	1997	12	15	1810	349	Mon	1	N-East	4.58163642883301	2.99929285049438	6.16025924682617	0.804094195365906	70.8017349243164	83
1811	1997-12-16	1997	12	16	1811	350	Tue	1	N-East	4.74942207336426	4.06587934494019	5.43296384811401	-1.67543482780457	61.5310173034668	69
1812	1997-12-17	1997	12	17	1812	351	Wed	1	N-East	3.98087763786316	2.40554928779602	5.55620670318604	-1.49590599536896	65.7918167114258	75
1813	1997-12-18	1997	12	18	1813	352	Thu	1	N-East	4.38942766189575	1.66272461414337	7.11613082885742	5.10409355163574	89.6999969482422	86
1814	1997-12-19	1997	12	19	1814	353	Fri	1	N-East	6.66358613967896	5.64799356460571	7.67917919158936	6.91228294372559	96.4941635131836	95
1815	1997-12-20	1997	12	20	1815	354	Sat	1	N-East	6.39922428131104	4.59638833999634	8.20205974578857	4.86315250396729	87.5263061523438	97
1816	1997-12-21	1997	12	21	1816	355	Sun	1	N-East	6.62795400619507	5.14355373382568	8.11235427856445	5.69181156158447	88.6105346679688	97
1817	1997-12-22	1997	12	22	1817	356	Mon	1	N-East	4.33852958679199	2.86485004425049	5.81220865249634	3.32456493377686	90.7859802246094	89
1818	1997-12-23	1997	12	23	1818	357	Tue	1	N-East	6.54570865631104	3.3013710975647	9.79004669189453	4.7918119430542	86.2719573974609	66
1819	1997-12-24	1997	12	24	1819	358	Wed	1	N-East	8.30723667144775	5.42700290679932	11.1874723434448	4.63275337219238	83.1538391113281	82
1820	1997-12-25	1997	12	25	1820	359	Thu	1	N-East	7.12496709823608	5.35619163513184	8.89374351501465	4.0918116569519	82.5000076293945	94
1821	1997-12-26	1997	12	26	1821	360	Fri	1	N-East	5.79134368896484	4.47812080383301	7.10456800460815	2.17134070396423	75.9157562255859	98
1822	1997-12-27	1997	12	27	1822	361	Sat	1	N-East	5.2642936706543	3.83444809913635	6.69413900375366	2.74677562713623	79.9239501953125	86
1823	1997-12-28	1997	12	28	1823	362	Sun	1	N-East	4.38518476486206	3.48954510688782	5.28082513809204	2.18362331390381	82.6081848144531	105
1824	1997-12-29	1997	12	29	1824	363	Mon	1	N-East	3.36513829231262	1.13229846954346	5.59797763824463	1.7713406085968	92.2467803955078	92
1825	1997-12-30	1997	12	30	1825	364	Tue	1	N-East	5.85746097564697	2.39878368377686	9.31613826751709	5.32047128677368	83.598876953125	118
1826	1997-12-31	1997	12	31	1826	365	Wed	1	N-East	6.38406753540039	4.00116872787476	8.76696681976318	0.845035970211029	68.2626419067383	95
1827	1998-01-01	1998	1	1	1827	1	Thu	1	N-East	4.06086874008179	0.391666978597641	7.73007106781006	0.300000011920929	81.6491241455078	121
1828	1998-01-02	1998	1	2	1828	2	Fri	1	N-East	5.19867515563965	2.31556677818298	8.08178329467773	1.89181172847748	76.1169967651367	95
1829	1998-01-03	1998	1	3	1829	3	Sat	1	N-East	5.8491735458374	3.87221741676331	7.8261284828186	2.75496387481689	74.9157562255859	87
1830	1998-01-04	1998	1	4	1830	4	Sun	1	N-East	4.1718111038208	2.37631225585938	5.96730947494507	0.728659212589264	75.0620346069336	91
1831	1998-01-05	1998	1	5	1831	5	Mon	1	N-East	3.03978896141052	1.30523121356964	4.77434635162354	0.591811656951904	81.1245651245117	83
1832	1998-01-06	1998	1	6	1832	6	Tue	1	N-East	3.07350134849548	1.13107872009277	5.01592350006104	0.304094165563583	81.6818771362305	116
1833	1998-01-07	1998	1	7	1833	7	Wed	1	N-East	3.91774845123291	1.96928918361664	5.86620807647705	1.0450359582901	72.4123840332031	100
1834	1998-01-08	1998	1	8	1834	8	Thu	1	N-East	5.46877574920654	2.14366579055786	8.79388427734375	1.97952914237976	86.4006118774414	88
1835	1998-01-09	1998	1	9	1835	9	Fri	1	N-East	8.12957096099854	2.84500813484192	13.414134979248	8.08771800994873	72.6532211303711	103
1836	1998-01-10	1998	1	10	1836	10	Sat	1	N-East	11.0746593475342	9.44685077667236	12.7024669647217	7.23275327682495	69.0129013061523	93
1837	1998-01-11	1998	1	11	1837	11	Sun	1	N-East	8.42644119262695	5.20452260971069	11.6483612060547	4.02456521987915	80.3456497192383	82
1838	1998-01-12	1998	1	12	1838	12	Mon	1	N-East	7.4193320274353	4.9612717628479	9.87739372253418	5.17543506622314	84.3637619018555	105
1839	1998-01-13	1998	1	13	1839	13	Tue	1	N-East	7.26701593399048	5.38425397872925	9.14977931976318	7.97543478012085	96.8350982666016	88
1840	1998-01-14	1998	1	14	1840	14	Wed	1	N-East	5.64073324203491	3.46892046928406	7.81254577636719	2.20000004768372	78.3999938964844	89
1841	1998-01-15	1998	1	15	1841	15	Thu	1	N-East	6.05216503143311	3.75036406517029	8.35396671295166	2.5	71.735725402832	92
1842	1998-01-16	1998	1	16	1842	16	Fri	1	N-East	4.86278867721558	2.63414430618286	7.09143400192261	0.19181165099144	70.9754333496094	91
1843	1998-01-17	1998	1	17	1843	17	Sat	1	N-East	5.77918195724487	3.09066867828369	8.46769428253174	3.22047090530396	73.2520980834961	112
1844	1998-01-18	1998	1	18	1844	18	Sun	1	N-East	5.44644403457642	4.01324939727783	6.87963914871216	5.32865953445435	94.2169952392578	98
1845	1998-01-19	1998	1	19	1845	19	Mon	1	N-East	1.88115406036377	-0.0407553017139435	3.80306339263916	-3.44677567481995	70.3432922363281	89
1846	1998-01-20	1998	1	20	1846	20	Tue	1	N-East	1.32936477661133	-0.565957844257355	3.22468757629395	-1.17952919006348	76.946159362793	71
1847	1998-01-21	1998	1	21	1847	21	Wed	1	N-East	2.09591841697693	-0.757763087749481	4.9495997428894	-0.0344931781291962	83.0889434814453	91
1848	1998-01-22	1998	1	22	1848	22	Thu	1	N-East	4.53029012680054	2.23573970794678	6.82483863830566	4.94913053512573	91.0310134887695	90
1849	1998-01-23	1998	1	23	1849	23	Fri	1	N-East	4.23335361480713	2.13966870307922	6.3270378112793	4.43275356292725	93.7122802734375	80
1850	1998-01-24	1998	1	24	1850	24	Sat	1	N-East	3.79243564605713	1.98161053657532	5.60326099395752	0.0368475876748562	71.5088043212891	88
1851	1998-01-25	1998	1	25	1851	25	Sun	1	N-East	3.25977611541748	1.18485641479492	5.33469581604004	-1.46724665164948	68.0754318237305	85
1852	1998-01-26	1998	1	26	1852	26	Mon	1	N-East	2.72594165802002	1.24193251132965	4.20995044708252	0.387717485427856	78.1549606323242	86
1853	1998-01-27	1998	1	27	1853	27	Tue	1	N-East	1.01955711841583	-1.52298927307129	3.56210350990295	-2.66724681854248	72.6374588012695	95
1854	1998-01-28	1998	1	28	1854	28	Wed	1	N-East	1.1996523141861	-1.21125638484955	3.61056113243103	-0.542681574821472	80.9836196899414	87
1855	1998-01-29	1998	1	29	1855	29	Thu	1	N-East	3.46790051460266	0.690404176712036	6.24539709091187	0.345035940408707	73.4064559936523	88
1856	1998-01-30	1998	1	30	1856	30	Fri	1	N-East	4.50494623184204	1.80614829063416	7.20374536514282	0.24503593146801	73.6877136230469	93
1857	1998-01-31	1998	1	31	1857	31	Sat	1	N-East	3.93390226364136	2.78573656082153	5.08206796646118	-0.204094186425209	72.2245635986328	97
1858	1998-02-01	1998	2	1	1858	32	Sun	1	N-East	3.17133092880249	0.306112051010132	6.03655052185059	0.591811656951904	80.4198532104492	88
1859	1998-02-02	1998	2	2	1859	33	Mon	1	N-East	3.23324775695801	0.468899488449097	5.99759531021118	-2.25086975097656	65.4169921875	83
1860	1998-02-03	1998	2	3	1860	34	Tue	1	N-East	2.70974779129028	-1.3836590051651	6.80315446853638	-2.15086984634399	65.2316284179688	79
1861	1998-02-04	1998	2	4	1861	35	Wed	1	N-East	5.33717679977417	2.48996424674988	8.18438911437988	1.87952923774719	69.3672485351562	96
1862	1998-02-05	1998	2	5	1862	36	Thu	1	N-East	7.43395948410034	5.75749492645264	9.11042499542236	3.60818839073181	72.2596740722656	92
1863	1998-02-06	1998	2	6	1863	37	Fri	1	N-East	7.49130392074585	6.09982109069824	8.88278770446777	2.85322427749634	67.9216995239258	96
1864	1998-02-07	1998	2	7	1864	38	Sat	1	N-East	4.98369455337524	2.37377238273621	7.5936164855957	-0.704094111919403	65.9795303344727	83
1865	1998-02-08	1998	2	8	1865	39	Sun	1	N-East	6.78128862380981	3.15116453170776	10.4114112854004	4.46141290664673	72.3439102172852	93
1866	1998-02-09	1998	2	9	1866	40	Mon	1	N-East	9.54116249084473	7.42035055160522	11.6619758605957	6.03275394439697	72.0310211181641	99
1867	1998-02-10	1998	2	10	1867	41	Tue	1	N-East	9.25585746765137	7.20791053771973	11.3038015365601	3.0777895450592	65.3386917114258	98
1868	1998-02-11	1998	2	11	1868	42	Wed	1	N-East	10.3827123641968	7.76635360717773	12.9990730285645	7.33684778213501	70.1497497558594	90
1869	1998-02-12	1998	2	12	1869	43	Thu	1	N-East	11.7030954360962	10.4253606796265	12.9808292388916	8.33684730529785	74.788330078125	112
1870	1998-02-13	1998	2	13	1870	44	Fri	1	N-East	13.0882997512817	10.2989921569824	15.8776082992554	8.22456455230713	67.2766647338867	88
1871	1998-02-14	1998	2	14	1871	45	Sat	1	N-East	12.6146306991577	9.98070430755615	15.2485589981079	7.66141319274902	68.1363372802734	89
1872	1998-02-15	1998	2	15	1872	46	Sun	1	N-East	12.6116704940796	10.7522459030151	14.4710941314697	8.60000038146973	71.213508605957	81
1873	1998-02-16	1998	2	16	1873	47	Mon	1	N-East	9.76901531219482	7.59842491149902	11.9396057128906	4.60818862915039	71.6473922729492	74
1874	1998-02-17	1998	2	17	1874	48	Tue	1	N-East	7.87882089614868	2.66484713554382	13.092794418335	6.42047071456909	75.681884765625	99
1875	1998-02-18	1998	2	18	1875	49	Wed	1	N-East	7.66538953781128	4.14905881881714	11.1817207336426	5.41228246688843	79.7842254638672	75
1876	1998-02-19	1998	2	19	1876	50	Thu	1	N-East	8.06135749816895	3.9741313457489	12.1485815048218	6.32047128677368	74.9988632202148	98
1877	1998-02-20	1998	2	20	1877	51	Fri	1	N-East	10.0323143005371	7.62651681900024	12.4381103515625	6.78362321853638	74.6620254516602	88
1878	1998-02-21	1998	2	21	1878	52	Sat	1	N-East	8.00182819366455	5.33147430419922	10.6721811294556	3.49181175231934	75.061408996582	87
1879	1998-02-22	1998	2	22	1879	53	Sun	1	N-East	6.31791114807129	2.30582118034363	10.3300008773804	0.883623242378235	68.0362319946289	84
1880	1998-02-23	1998	2	23	1880	54	Mon	1	N-East	8.75263500213623	5.68213272094727	11.8231363296509	6.77952909469604	73.0648880004883	89
1881	1998-02-24	1998	2	24	1881	55	Tue	1	N-East	11.1141052246094	8.95012664794922	13.2780828475952	5.89181137084961	69.1485214233398	84
1882	1998-02-25	1998	2	25	1882	56	Wed	1	N-East	7.03266620635986	2.54495787620544	11.5203733444214	1.84094166755676	60.9135131835938	77
1883	1998-02-26	1998	2	26	1883	57	Thu	1	N-East	7.53515434265137	5.50786781311035	9.56243896484375	2.26724648475647	64.7099304199219	105
1884	1998-02-27	1998	2	27	1884	58	Fri	1	N-East	7.06946229934692	3.98356890678406	10.1553554534912	2.12865924835205	64.1585540771484	80
1885	1998-02-28	1998	2	28	1885	59	Sat	1	N-East	2.4690113067627	-0.370186269283295	5.30820894241333	-3.87778925895691	62.5946731567383	82
1886	1998-03-01	1998	3	1	1886	60	Sun	1	N-East	1.07262241840363	-3.53742718696594	5.68267250061035	-1.2286593914032	80.7215881347656	107
1887	1998-03-02	1998	3	2	1887	61	Mon	1	N-East	4.72426843643188	0.186303898692131	9.26223182678223	-0.608188331127167	60.4754333496094	78
1888	1998-03-03	1998	3	3	1888	62	Tue	1	N-East	8.06793594360352	5.64874792098999	10.4871263504028	7.08362293243408	79.6316299438477	108
1889	1998-03-04	1998	3	4	1889	63	Wed	1	N-East	4.04623031616211	0.229446619749069	7.86301279067993	-0.854964017868042	64.6473922729492	94
1890	1998-03-05	1998	3	5	1890	64	Thu	1	N-East	3.8501443862915	0.847248315811157	6.85304117202759	-1.73684751987457	62.3508720397949	81
1891	1998-03-06	1998	3	6	1891	65	Fri	1	N-East	2.57143998146057	-1.02021241188049	6.16309213638306	-0.124565064907074	86.6806564331055	72
1892	1998-03-07	1998	3	7	1892	66	Sat	1	N-East	6.40332508087158	1.63606679439545	11.1705827713013	5.12865924835205	71.1807556152344	99
1893	1998-03-08	1998	3	8	1893	67	Sun	1	N-East	3.99855947494507	1.63867890834808	6.35844087600708	-2.26141262054443	58.6584434509277	93
1894	1998-03-09	1998	3	9	1894	68	Mon	1	N-East	2.38509154319763	-3.43940234184265	8.20958518981934	-1.98771750926971	62.7374610900879	102
1895	1998-03-10	1998	3	10	1895	69	Tue	1	N-East	4.45773983001709	1.65148591995239	7.26399421691895	1.42865920066833	79.5596771240234	99
1896	1998-03-11	1998	3	11	1896	70	Wed	1	N-East	6.00408601760864	2.75135159492493	9.25682067871094	-3.79181170463562	47.5655059814453	94
1897	1998-03-12	1998	3	12	1897	71	Thu	1	N-East	3.99658799171448	-0.548702895641327	8.54187870025635	0.495905816555023	75.3327560424805	84
1898	1998-03-13	1998	3	13	1898	72	Fri	1	N-East	7.66737079620361	4.20783996582031	11.1269006729126	4.25087022781372	72.0970306396484	102
1899	1998-03-14	1998	3	14	1899	73	Sat	1	N-East	9.29946136474609	4.86617040634155	13.7327527999878	5.40000009536743	72.8818817138672	100
1900	1998-03-15	1998	3	15	1900	74	Sun	1	N-East	10.3674640655518	7.73709297180176	12.9978361129761	5.9081883430481	69.5181121826172	89
1901	1998-03-16	1998	3	16	1901	75	Mon	1	N-East	10.4260702133179	7.7819390296936	13.070198059082	6.12865924835205	73.6579360961914	94
1902	1998-03-17	1998	3	17	1902	76	Tue	1	N-East	10.5183124542236	7.54663419723511	13.489990234375	6.25905847549438	75.6683731079102	87
1903	1998-03-18	1998	3	18	1903	77	Wed	1	N-East	8.27194309234619	5.71605205535889	10.8278350830078	2.19764566421509	62.9332656860352	95
1904	1998-03-19	1998	3	19	1904	78	Thu	1	N-East	6.61230373382568	1.63455605506897	11.5900506973267	1.5163768529892	62.7000007629395	97
1905	1998-03-20	1998	3	20	1905	79	Fri	1	N-East	9.1625280380249	6.72010707855225	11.6049480438232	4.32456541061401	67.4286575317383	97
1906	1998-03-21	1998	3	21	1906	80	Sat	1	N-East	9.00711250305176	6.61390829086304	11.4003190994263	2.09416604042053	59.4486198425293	112
1907	1998-03-22	1998	3	22	1907	81	Sun	1	N-East	6.32552242279053	0.624509155750275	12.026535987854	1.09416604042053	59.6322402954102	101
1908	1998-03-23	1998	3	23	1908	82	Mon	1	N-East	6.5190749168396	5.54959678649902	7.48855257034302	2.59416604042053	71.1042022705078	105
1909	1998-03-24	1998	3	24	1909	83	Tue	1	N-East	6.52442312240601	3.99231195449829	9.05653381347656	4.63684749603271	84.5187377929688	90
1910	1998-03-25	1998	3	25	1910	84	Wed	1	N-East	8.62236785888672	5.37902355194092	11.8657112121582	6.81228256225586	82.6924285888672	93
1911	1998-03-26	1998	3	26	1911	85	Thu	1	N-East	10.918420791626	7.96012401580811	13.8767185211182	7.32047128677368	70.3187255859375	84
1912	1998-03-27	1998	3	27	1912	86	Fri	1	N-East	9.71248912811279	6.0802059173584	13.3447723388672	6.12865924835205	68.894775390625	106
1913	1998-03-28	1998	3	28	1913	87	Sat	1	N-East	12.716420173645	8.39446640014648	17.0383720397949	6.55731821060181	61.3778915405273	107
1914	1998-03-29	1998	3	29	1914	88	Sun	1	N-East	9.43863010406494	5.82390880584717	13.0533514022827	7.49590539932251	86.7251739501953	87
1915	1998-03-30	1998	3	30	1915	89	Mon	1	N-East	11.1729860305786	8.08481407165527	14.2611570358276	10.0549650192261	81.5088043212891	107
1916	1998-03-31	1998	3	31	1916	90	Tue	1	N-East	9.79927062988281	7.23466014862061	12.3638820648193	4.35322427749634	68.4193420410156	90
1917	1998-04-01	1998	4	1	1917	91	Wed	1	N-East	6.36921405792236	5.27014684677124	7.46828079223633	2.28362345695496	71.7204666137695	80
1918	1998-04-02	1998	4	2	1918	92	Thu	1	N-East	6.02522993087769	4.36194086074829	7.68851900100708	4.45496416091919	89.1707305908203	97
1919	1998-04-03	1998	4	3	1919	93	Fri	1	N-East	8.2178258895874	4.71268606185913	11.7229671478271	4.37778997421265	67.9293823242188	93
1920	1998-04-04	1998	4	4	1920	94	Sat	1	N-East	7.7234992980957	5.42955207824707	10.01744556427	7.27543497085571	89.8982620239258	104
1921	1998-04-05	1998	4	5	1921	95	Sun	1	N-East	9.28234767913818	6.99824237823486	11.5664548873901	6.92865991592407	86.5947799682617	89
1922	1998-04-06	1998	4	6	1922	96	Mon	1	N-East	8.37889862060547	5.33533000946045	11.4224672317505	4.69416570663452	74.9837341308594	89
1923	1998-04-07	1998	4	7	1923	97	Tue	1	N-East	7.54290866851807	5.78988409042358	9.29593372344971	5.73684740066528	87.2415542602539	97
1924	1998-04-08	1998	4	8	1924	98	Wed	1	N-East	6.27685546875	4.79273128509521	7.76098012924194	5.00409412384033	87.061408996582	70
1925	1998-04-09	1998	4	9	1925	99	Thu	1	N-East	4.81959915161133	2.41004657745361	7.2291522026062	-1.96724665164948	60.1234397888184	83
1926	1998-04-10	1998	4	10	1926	100	Fri	1	N-East	3.08800673484802	0.368684381246567	5.80732917785645	-2.27543473243713	60.8204689025879	85
1927	1998-04-11	1998	4	11	1927	101	Sat	1	N-East	3.64033770561218	0.935428559780121	6.34524726867676	-3.72630500793457	53.2865905761719	82
1928	1998-04-12	1998	4	12	1928	102	Sun	1	N-East	3.12340831756592	-0.732079088687897	6.97889518737793	-2.69764566421509	62.6591606140137	91
1929	1998-04-13	1998	4	13	1929	103	Mon	1	N-East	3.09213805198669	-0.494222968816757	6.67849826812744	-5.13449335098267	51.7275352478027	84
1930	1998-04-14	1998	4	14	1930	104	Tue	1	N-East	2.44895172119141	-1.90803492069244	6.80593824386597	-6.47717475891113	48.1135101318359	87
1931	1998-04-15	1998	4	15	1931	105	Wed	1	N-East	3.49275064468384	-1.96304595470428	8.94854736328125	-2.80583381652832	55.4462661743164	79
1932	1998-04-16	1998	4	16	1932	106	Thu	1	N-East	3.54268455505371	-0.895639479160309	7.98100900650024	0.640941798686981	86.1859817504883	92
1933	1998-04-17	1998	4	17	1933	107	Fri	1	N-East	4.4024486541748	2.07514071464539	6.75285053253174	1.46550679206848	76.788948059082	84
1934	1998-04-18	1998	4	18	1934	108	Sat	1	N-East	6.80455684661865	3.32138919830322	10.2877254486084	2.84094190597534	71.2719497680664	84
1935	1998-04-19	1998	4	19	1935	109	Sun	1	N-East	7.64568471908569	4.42058515548706	10.8707847595215	3.55731868743896	72.9421691894531	79
1936	1998-04-20	1998	4	20	1936	110	Mon	1	N-East	9.72187519073486	6.22830486297607	13.2154445648193	7.28362321853638	84.841552734375	87
1937	1998-04-21	1998	4	21	1937	111	Tue	1	N-East	8.16361999511719	3.76025629043579	12.5544157028198	3.99007201194763	61.5761528015137	95
1938	1998-04-22	1998	4	22	1938	112	Wed	1	N-East	11.5129890441895	8.10869979858398	14.9172792434692	7.88771772384644	77.5486145019531	95
1939	1998-04-23	1998	4	23	1939	113	Thu	1	N-East	11.5293750762939	8.58456611633301	14.4741849899292	8.53684711456299	74.5030670166016	98
1940	1998-04-24	1998	4	24	1940	114	Fri	1	N-East	11.3773021697998	7.78479051589966	14.9698152542114	7.34503602981567	69.3473892211914	86
1941	1998-04-25	1998	4	25	1941	115	Sat	1	N-East	10.8868389129639	7.39241647720337	14.3707399368286	1.64913010597229	49.284236907959	74
1942	1998-04-26	1998	4	26	1942	116	Sun	1	N-East	9.36964893341064	6.28322792053223	12.4560670852661	4.18188333511353	64.3983612060547	79
1943	1998-04-27	1998	4	27	1943	117	Mon	1	N-East	9.18003273010254	4.17419099807739	14.1858730316162	1.83920192718506	51.1287651062012	82
1944	1998-04-28	1998	4	28	1944	118	Tue	1	N-East	8.55810642242432	4.96491527557373	12.1512985229492	4.19007158279419	66.3673477172852	84
1945	1998-04-29	1998	4	29	1945	119	Wed	1	N-East	8.96117782592773	3.81690216064453	14.1288452148438	5.37778949737549	70.091911315918	90
1946	1998-04-30	1998	4	30	1946	120	Thu	1	N-East	7.8487868309021	6.73063850402832	8.96693420410156	4.15731811523438	75.6176071166992	100
1947	1998-05-01	1998	5	1	1947	121	Fri	1	N-East	9.0636625289917	6.05920791625977	12.0681190490723	3.38188362121582	65.9977493286133	72
1948	1998-05-02	1998	5	2	1948	122	Sat	1	N-East	8.03045749664307	2.87207961082458	13.1888341903687	2.48188376426697	54.1421737670898	91
1949	1998-05-03	1998	5	3	1949	123	Sun	1	N-East	8.54940605163574	5.25594520568848	11.8428659439087	0.461412638425827	56.3643836975098	76
1950	1998-05-04	1998	5	4	1950	124	Mon	1	N-East	10.9195690155029	4.82461071014404	17.0145244598389	4.22865915298462	55.6900672912598	66
1951	1998-05-05	1998	5	5	1951	125	Tue	1	N-East	9.82175827026367	6.74122381210327	12.9022941589355	4.50818824768066	63.6631546020508	93
1952	1998-05-06	1998	5	6	1952	126	Wed	1	N-East	10.2568473815918	6.79213523864746	13.7215585708618	3.56550693511963	59.8351097106934	80
1953	1998-05-07	1998	5	7	1953	127	Thu	1	N-East	12.6526956558228	9.13003635406494	16.1753520965576	5.65731859207153	53.611156463623	93
1954	1998-05-08	1998	5	8	1954	128	Fri	1	N-East	12.8327560424805	9.57972526550293	16.085786819458	7.67134094238281	71.9409408569336	93
1955	1998-05-09	1998	5	9	1955	129	Sat	1	N-East	14.6009683609009	8.98374080657959	20.2181930541992	7.84913063049316	56.8684768676758	85
1956	1998-05-10	1998	5	10	1956	130	Sun	1	N-East	10.3232736587524	6.91727161407471	13.7292747497559	1.7105427980423	50.4527130126953	84
1957	1998-05-11	1998	5	11	1957	131	Mon	1	N-East	8.88290786743164	7.5009880065918	10.2648296356201	6.42456531524658	84.5941696166992	81
1958	1998-05-12	1998	5	12	1958	132	Tue	1	N-East	10.7506504058838	7.15380477905273	14.3474969863892	6.94094181060791	74.2199478149414	83
1959	1998-05-13	1998	5	13	1959	133	Wed	1	N-East	11.9942770004272	8.99391174316406	14.9946422576904	9.78362274169922	88.090690612793	74
1960	1998-05-14	1998	5	14	1960	134	Thu	1	N-East	14.0217151641846	8.78669548034668	19.2567348480225	10.0590591430664	68.3731918334961	73
1961	1998-05-15	1998	5	15	1961	135	Fri	1	N-East	12.9401321411133	7.29963493347168	18.5806312561035	8.45322418212891	67.7785110473633	74
1962	1998-05-16	1998	5	16	1962	136	Sat	1	N-East	13.3252124786377	8.05761909484863	18.5928077697754	8.3532247543335	64.1920166015625	70
1963	1998-05-17	1998	5	17	1963	137	Sun	1	N-East	13.7949075698853	7.09822225570679	20.4915924072266	6.69007158279419	48.5551719665527	82
1964	1998-05-18	1998	5	18	1964	138	Mon	1	N-East	16.2308654785156	9.61573123931885	22.8460006713867	8.71873188018799	51.7715492248535	84
1965	1998-05-19	1998	5	19	1965	139	Tue	1	N-East	13.2793674468994	8.12465763092041	18.4340763092041	9.012282371521	72.7591552734375	77
1966	1998-05-20	1998	5	20	1966	140	Wed	1	N-East	11.9873628616333	9.64055824279785	14.3341665267944	8.89181137084961	77.6240539550781	66
1967	1998-05-21	1998	5	21	1967	141	Thu	1	N-East	11.7745971679688	8.82733917236328	14.7218551635742	2.78188347816467	53.7947807312012	69
1968	1998-05-22	1998	5	22	1968	142	Fri	1	N-East	11.7031564712524	6.47986555099487	16.9264450073242	6.39181184768677	60.7257957458496	77
1969	1998-05-23	1998	5	23	1969	143	Sat	1	N-East	12.267840385437	8.90473175048828	15.6309490203857	9.3040943145752	72.5702209472656	80
1970	1998-05-24	1998	5	24	1970	144	Sun	1	N-East	15.1382570266724	10.7726888656616	19.5038242340088	6.6040940284729	59.057315826416	66
1971	1998-05-25	1998	5	25	1971	145	Mon	1	N-East	13.4591159820557	9.55198764801025	17.3662452697754	7.89181184768677	64.7566986083984	82
1972	1998-05-26	1998	5	26	1972	146	Tue	1	N-East	9.55416107177734	7.5779504776001	11.5303726196289	1.83684754371643	54.7316284179688	80
1973	1998-05-27	1998	5	27	1973	147	Wed	1	N-East	9.45591068267822	5.74323797225952	13.1754722595215	5.59416627883911	71.7632522583008	75
1974	1998-05-28	1998	5	28	1974	148	Thu	1	N-East	8.60597038269043	5.24089670181274	11.9836082458496	8.32865905761719	84.1251831054688	83
1975	1998-05-29	1998	5	29	1975	149	Fri	1	N-East	10.7805652618408	9.94770431518555	11.6134243011475	10.8426809310913	97.2935485839844	86
1976	1998-05-30	1998	5	30	1976	150	Sat	1	N-East	10.8783359527588	9.42409133911133	12.3325805664062	10.2877178192139	94.4269256591797	74
1977	1998-05-31	1998	5	31	1977	151	Sun	1	N-East	12.7281923294067	9.41419315338135	16.0421905517578	10.3959054946899	87.024055480957	75
1978	1998-06-01	1998	6	1	1978	152	Mon	1	N-East	9.77231788635254	8.74644470214844	10.7981910705566	7.78362321853638	89.7058334350586	66
1979	1998-06-02	1998	6	2	1979	153	Tue	1	N-East	8.32257652282715	7.30382490158081	9.34132766723633	6.17543506622314	82.5256881713867	76
1980	1998-06-03	1998	6	3	1980	154	Wed	1	N-East	8.57338619232178	5.95091915130615	11.1958532333374	4.28597784042358	75.8497467041016	81
1981	1998-06-04	1998	6	4	1981	155	Thu	1	N-East	9.21655941009521	3.14686489105225	15.2862539291382	3.39826011657715	51.8837280273438	68
1982	1998-06-05	1998	6	5	1982	156	Fri	1	N-East	11.0193634033203	6.99416399002075	15.0445642471313	4.18423795700073	55.282600402832	85
1983	1998-06-06	1998	6	6	1983	157	Sat	1	N-East	12.1858501434326	9.56924819946289	14.8024492263794	11.0754346847534	97.4000015258789	79
1984	1998-06-07	1998	6	7	1984	158	Sun	1	N-East	14.4848003387451	10.8268957138062	18.1427040100098	9.88188362121582	71.1410522460938	73
1985	1998-06-08	1998	6	8	1985	159	Mon	1	N-East	12.5426092147827	10.0757350921631	15.0094833374023	7.51637649536133	76.7736892700195	68
1986	1998-06-09	1998	6	9	1986	160	Tue	1	N-East	14.4787254333496	11.1853370666504	17.7721118927002	10.987717628479	72.4801483154297	73
1987	1998-06-10	1998	6	10	1987	161	Wed	1	N-East	12.9738788604736	9.00976085662842	16.9379997253418	5.89416646957397	52.5644836425781	101
1988	1998-06-11	1998	6	11	1988	162	Thu	1	N-East	8.88861656188965	5.80429458618164	11.9729375839233	0.908188343048096	54.8713417053223	81
1989	1998-06-12	1998	6	12	1989	163	Fri	1	N-East	10.234395980835	5.60479784011841	14.863995552063	1.74913012981415	51.1743125915527	57
1990	1998-06-13	1998	6	13	1990	164	Sat	1	N-East	8.34660911560059	3.64080595970154	13.0524110794067	5.84094190597534	71.5064468383789	90
1991	1998-06-14	1998	6	14	1991	165	Sun	1	N-East	10.5903186798096	9.77660274505615	11.4040336608887	10.5549650192261	97.371337890625	83
1992	1998-06-15	1998	6	15	1992	166	Mon	1	N-East	11.6688203811646	10.0516929626465	13.2859449386597	10.3245649337769	88.8988800048828	77
1993	1998-06-16	1998	6	16	1993	167	Tue	1	N-East	11.4749813079834	8.65528774261475	14.2946748733521	7.80000066757202	75.2736968994141	67
1994	1998-06-17	1998	6	17	1994	168	Wed	1	N-East	12.0223064422607	6.42940759658813	17.6152038574219	6.00644826889038	57.0755424499512	74
1995	1998-06-18	1998	6	18	1995	169	Thu	1	N-East	12.7532386779785	7.9247088432312	17.6017532348633	9.90818881988525	70.8527145385742	76
1996	1998-06-19	1998	6	19	1996	170	Fri	1	N-East	17.9184684753418	12.4271755218506	23.4169864654541	13.8450365066528	65.2744140625	84
1997	1998-06-20	1998	6	20	1997	171	Sat	1	N-East	20.9162330627441	15.5848569869995	26.2476062774658	13.8614130020142	56.0533256530762	83
1998	1998-06-21	1998	6	21	1998	172	Sun	1	N-East	18.6413764953613	15.6936082839966	21.5891399383545	10.9532241821289	57.1128997802734	73
1999	1998-06-22	1998	6	22	1999	173	Mon	1	N-East	14.9218235015869	11.7824115753174	18.0612392425537	6.71054267883301	52.0223197937012	80
[truncated: 49,131 more rows]
